# Supplementary material for: Solvent-free zinc-mediated Béchamp reduction using mechanochemistry
Source: Royal Society of Chemistry journal article supplement (doi:10.1039/d4mr00138a), 2025-01-01
Supplement: d4mr00138a1.pdf [file d4mr00138a1.pdf]

## **Solvent-free Zinc-mediated Béchamp Reduction Using Mechanochemistry**

Koji Kubota<sup>\*a,b</sup>, Asahi Nagao<sup>a</sup>, and Hajime Ito<sup>\*a,b</sup>

*<sup>a</sup>Division of Applied Chemistry, Graduate School of Engineering, Hokkaido University, Sapporo, Hokkaido, 060-8628, Japan.*

*<sup>b</sup>Institute for Chemical Reaction Design and Discovery (WPI-ICReDD), Hokkaido University, Sapporo, Hokkaido 001-0021, Japan.*

*e-mail: hajito@eng.hokudai.ac.jp, kbt@eng.hokudai.ac.jp*

### **Table of contents**

- 1. Chemicals and instrumentation**
- 2. List of substrates**
- 3. General procedure of zinc-mediated Béchamp reduction using mechanochemistry**
- 4. Procedure of gram-scale reaction**
- 5. Calculation of E-factors**
- 6. Characterization of products**
- 7. References**
- 8. NMR Spectra**

## 1. Chemicals and instrumentation

Materials were obtained from commercial suppliers and used as received. Zinc powder ( $<10\ \mu\text{m}$ ) was used in this study. Solvents for the synthesis of starting materials were also purchased from commercial suppliers and dried over molecular sieves (MS 4A) prior to use. All mechanochemical reactions were carried out using grinding vessels in a Retsch MM400 mill (Figure S1). Both jars (25 and 5 mL) and balls (10 mm) are made of stainless (SUS400B and SUS420J2, respectively) (Figure S2). A heat gun Takagi HG-1450B with a temperature control function was used for high-temperature ball-milling reactions (Figure S3). NMR spectra were recorded on JEOL JNM-EC X400P and JNM-ECS400 spectrometers ( $^1\text{H}$ : 396 or 401 MHz,  $^{13}\text{C}$ : 392 MHz). Tetramethylsilane ( $^1\text{H}$ ),  $\text{CDCl}_3$  ( $^{13}\text{C}$ ) were employed as external standards, respectively. Multiplicity was recorded as follows: s = singlet, brs = broad singlet, d = doublet, t = triplet, q = quartet, dd = double doublet, dt = double triplet, m = multiplet. Dibromomethane was used as an internal standard to determine NMR yields. High-resolution mass spectra were recorded at the Global Facility Center, Hokkaido University.

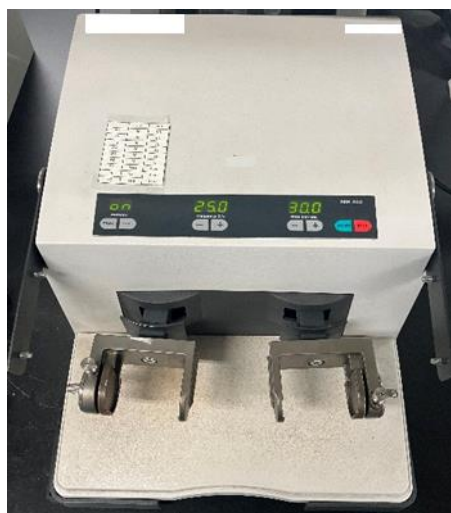

**Figure S1.** Retsch MM400 used in this study.

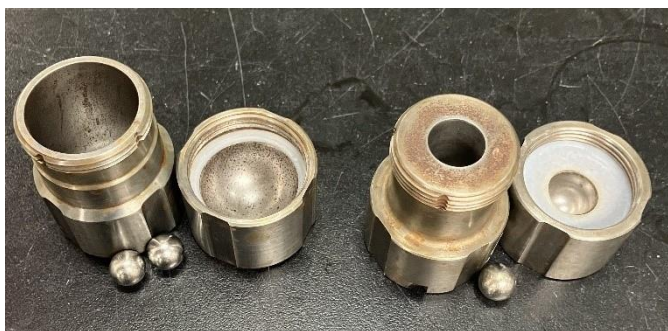

**Figure S2.** Stainless jar (25 mL and 5 mL) and balls (10 mm) used in this study.

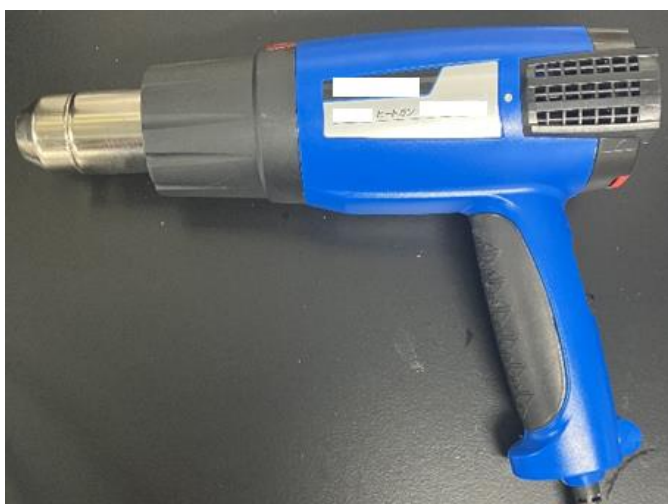

**Figure S3.** The temperature controllable heat gun Takagi HG-1450B used in this study.

## 2. List of substrates

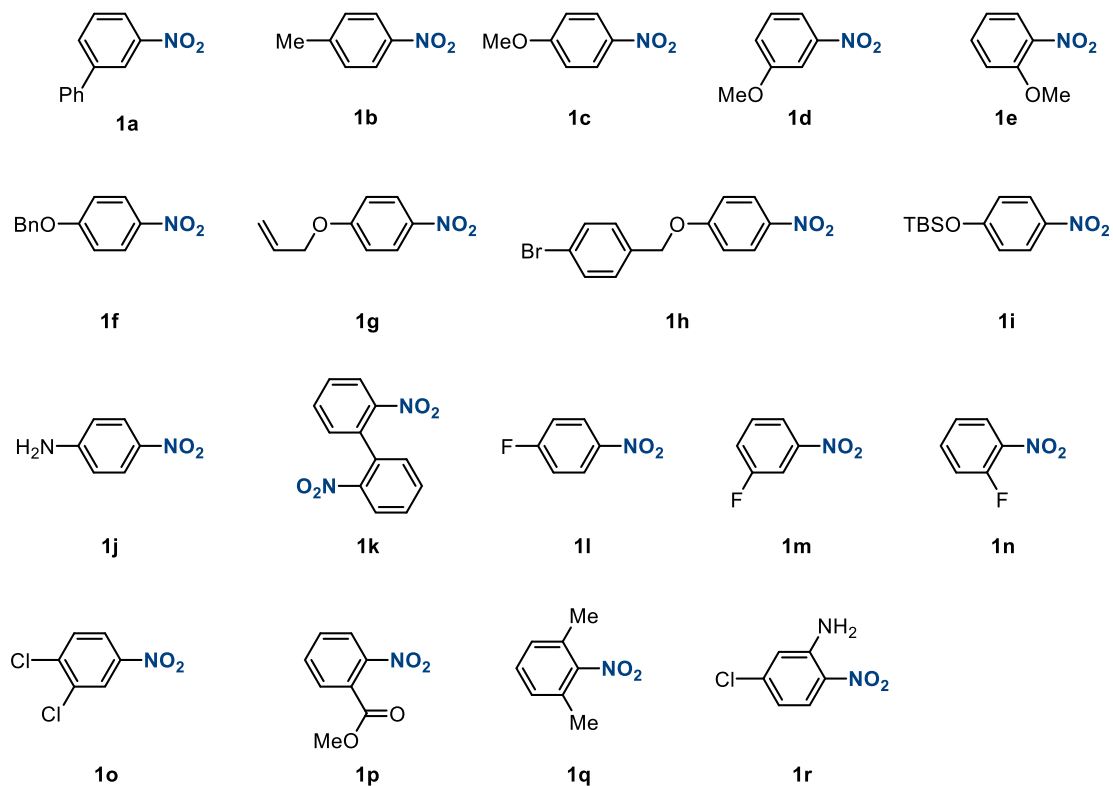

**1b–1e** and **1j–1r** were purchased from commercial supplier and used as received. **1a** was prepared via Suzuki-Miyaura coupling of the corresponding bromide with phenylboronic acid. **1f** and **1h** were prepared via benzyl protection of the corresponding phenol with benzyl bromide and  $K_2CO_3$ . **1g** was prepared via allylation of the corresponding phenol with allyl bromide and  $K_2CO_3$ . **1i** was prepared via *tert*-butyl dimethyl silyl (TBS) protection of the corresponding phenol with TBS chloride and imidazole.

### 3. General procedure of zinc-mediated Béchamp reduction using mechanochemistry

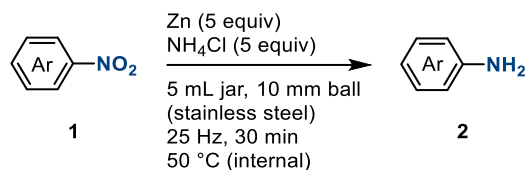

**General procedure A:** Commercially available Zn metal powder (2.5 mmol, 5.0 equiv), an aryl nitro compound (0.5 mmol, 1.0 equiv), an ammonium chloride (2.5 mmol, 5.0 equiv) were placed in a stainless milling jar (5 mL) with stainless ball (10 mm, diameter) in air. After the jar was closed without purging with inert gas, the jar was placed in the ball mill (Retsch MM 400, 30 min, 25 Hz). The heat gun was fixed with clamps and placed directly above the ball milling jar (distance between the heat gun and ball milling jar: ca. 1 cm, preset temperature: 70 °C, internal temperature in the jar : 50 °C). After grinding for 30 min, the jar was cooled to room temperature, opened in air, and then extracted with EtOAc or CH<sub>2</sub>Cl<sub>2</sub> three times. The resultant solution was dried over MgSO<sub>4</sub>, filtrated, and evaporated under a vacuum, after removal of the solvents under reduced pressure. NMR yields of the corresponding products were determined by <sup>1</sup>H NMR analysis with dibromomethane as the internal standard. The crude material was purified by flash chromatography (SiO<sub>2</sub>, typically EtOAc/hexane, typically 0:100–10:90) to give the corresponding product.

**General procedure B:** Commercially available Zn metal powder (2.5 mmol, 5.0 equiv), an aryl nitro compound (0.5 mmol, 1.0 equiv), an ammonium chloride (2.5 mmol, 5.0 equiv) were placed in a stainless milling jar (5 mL) with stainless ball (10 mm, diameter) in air. After the jar was closed without purging with inert gas, the jar was placed in the ball mill (Retsch MM 400, 30 min, 25 Hz). The heat gun was fixed with clamps and placed directly above the ball milling jar (distance between the heat gun and ball milling jar: ca. 1 cm, preset temperature: 70 °C, internal temperature in the jar : 50 °C). After grinding for 30 min, the jar was cooled to room temperature, opened in air, and then CDCl<sub>3</sub> was added in the jar. NMR yields of the corresponding products were determined by <sup>1</sup>H NMR analysis with dibromomethane as the internal standard.

#### Set-up procedure for high-temperature ball milling

The heat gun was fixed with clamps and placed directly above the ball milling jar (distance between the heat gun and ball milling jar: ca. 1 cm). The set-up procedure for high-temperature ball-milling reactions is shown in Figure S4. After the ball milling jar was closed, the jar was placed in the ball mill (Retsch MM400), and a heat gun was placed directly above the ball milling jar. The mechanochemical reduction of aryl nitro compound was conducted while applying heated air to the outside of the milling jar (the preset temperature at 70 °C). The temperature inside the milling jar of the mechanochemical reaction was confirmed by thermography immediately after opening the jar

(preset temperature: 70 °C, internal temperature in the jar : 50 °C).

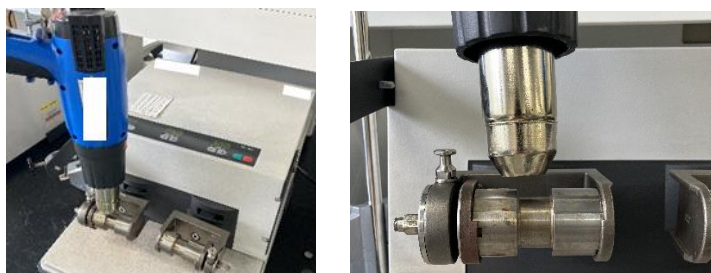

**Figure S4.** The set-up procedure for a heat gun on MM400.

#### 4. Procedure of gram-scale reaction

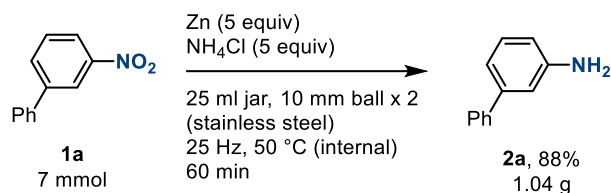

Commercially available Zn metal powder (2.5 mmol, 5.0 equiv), an aryl nitro compound (0.5 mmol, 1.0 equiv), an ammonium chloride (2.5 mmol, 5.0 equiv) were placed in a stainless milling jar (5 mL) with stainless ball (10 mm, diameter) in air. After the jar was closed without purging with inert gas, the jar was placed in the ball mill (Retsch MM 400, 60 min, 25 Hz). A heat gun was set in a downward direction approximately 1 cm above the jar and was turned on (preset temperature: 70 °C, internal temperature in the jar: ca. 50 °C). After grinding for 60 min, the jar was cooled to room temperature, opened in air, and then extracted with EtOAc three times. The resultant solution was dried over MgSO<sub>4</sub>, filtrated, and evaporated under a vacuum, after removal of the solvents under reduced pressure. NMR yields of the corresponding products were determined by <sup>1</sup>H NMR analysis with dibromomethane as the internal standard. The crude material was purified by flash chromatography (SiO<sub>2</sub>, EtOAc/hexane, typically 0:100–5:95) to give the corresponding product **2a** (88%, 1.038 g) as a yellow oil.

## 5. Calculation of E-factors

this work

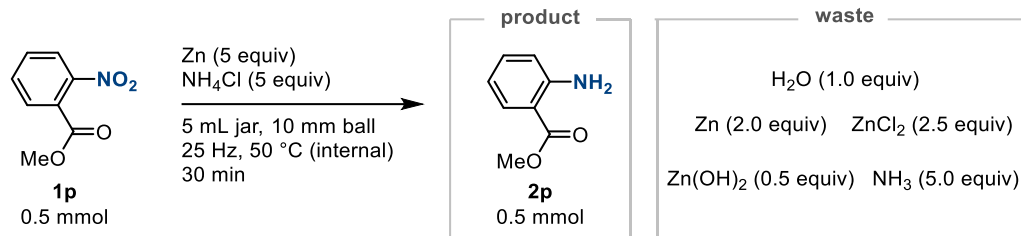

|                       | MW     | mmol | mg     |
|-----------------------|--------|------|--------|
| product ( <b>2p</b> ) | 151.17 | 0.5  | 75.59  |
| waste                 | MW     | mmol | mg     |
| H <sub>2</sub> O      | 18.02  | 1.0  | 9.01   |
| Zn                    | 65.38  | 0.5  | 65.38  |
| ZnCl <sub>2</sub>     | 136.28 | 1.0  | 170.35 |
| Zn(OH) <sub>2</sub>   | 99.39  | 1.0  | 24.85  |
| NH <sub>3</sub>       | 17.03  | 2.0  | 42.58  |
| total                 |        |      | 312.17 |

$$E = 312.17 / 75.59 = 4.1$$

in solution

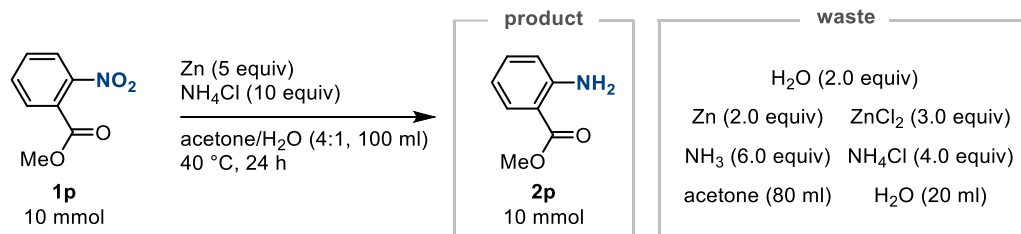

|                       | MW     | mmol | ml | density | g     |
|-----------------------|--------|------|----|---------|-------|
| product ( <b>2p</b> ) | 151.17 | 10   |    |         | 1.51  |
| waste                 | MW     | mmol |    |         | g     |
| H <sub>2</sub> O      | 18.02  | 20   |    |         | 0.36  |
| Zn                    | 65.38  | 20   |    |         | 1.31  |
| ZnCl <sub>2</sub>     | 136.28 | 30   |    |         | 4.09  |
| NH <sub>3</sub>       | 17.03  | 60   |    |         | 1.02  |
| NH <sub>4</sub> Cl    | 53.49  | 40   |    |         | 2.14  |
| acetone               |        |      | 80 | 0.79    | 63.04 |
| H <sub>2</sub> O      |        |      | 20 | 1.00    | 20.00 |
| total                 |        |      |    |         | 91.96 |

$$E = 91.96 / 1.51 = 60.9$$

## 6. Characterization of products

### 3-Aminobiphenyl (**2a**).

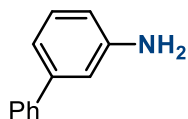

The reaction was conducted according to the general procedure A using 3-nitro-1,1'-biphenyl (**1a**, 99.5 mg, 0.5 mmol), Zn (164.2 mg, 2.5 mmol), and ammonium chloride (133.4 mg, 2.5 mmol). The resulting crude mixture was analyzed by  $^1\text{H}$  NMR with dibromomethane as an internal standard to determine the NMR yield of **2a** (95%). The crude mixture was purified by silica-gel column chromatography ( $\text{SiO}_2$ , EtOAc/hexane, 0:100–10:90) to afford **2a** as a yellow oil (68.5 mg, 0.40 mmol, 81% yield).  $^1\text{H}$  and  $^{13}\text{C}$  NMR were in agreement with the literature.<sup>1</sup>

$^1\text{H}$  NMR (396 MHz,  $\text{CDCl}_3$ ,  $\delta$ ): 3.71 (brs, 2H), 6.65–6.73 (m, 1H), 6.90 (t,  $J = 1.6$  Hz, 1H), 6.96–7.04 (m, 1H), 7.22 (t,  $J = 7.5$  Hz, 1H), 7.29–7.37 (m, 1H), 7.37–7.48 (m, 2H), 7.53–7.63 (m, 2H).  $^{13}\text{C}$  NMR (392 MHz,  $\text{CDCl}_3$ ,  $\delta$ ): 113.8 (CH), 114.0 (CH), 117.6 (CH), 127.1 (CH), 127.2 (CH), 128.6 (CH), 129.6 (CH), 141.3 (C), 142.4 (C), 146.7 (C). HRMS-ESI ( $m/z$ ):  $[\text{M}+\text{H}]^+$  calcd for  $\text{C}_{12}\text{H}_{12}\text{N}$ , 170.0964; found, 170.0962.

### *p*-Toluidine (**2b**).

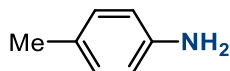

The reaction was conducted according to the general procedure A using 1-methyl-4-nitrobenzene (**2a**, 70.0 mg, 0.5 mmol), Zn (165.7 mg, 2.5 mmol), and ammonium chloride (134.2 mg, 2.5 mmol). The resulting crude mixture was analyzed by  $^1\text{H}$  NMR with dibromomethane as an internal standard to determine the NMR yield of **2b** (97%). The crude mixture was purified by silica-gel column chromatography ( $\text{SiO}_2$ , EtOAc/hexane, 0:100–20:80) to afford **2b** as a yellow oil (43.4 mg, 0.41 mmol, 79% yield).  $^1\text{H}$  and  $^{13}\text{C}$  NMR were in agreement with the literature.<sup>2</sup>

$^1\text{H}$  NMR (401 MHz,  $\text{CDCl}_3$ ,  $\delta$ ): 2.24 (s, 3H), 3.52 (brs, 2H), 6.57–6.67 (m, 2H), 6.96 (d,  $J = 8.4$  Hz, 2H).  $^{13}\text{C}$  NMR (392 MHz,  $\text{CDCl}_3$ ,  $\delta$ ): 20.4 ( $\text{CH}_3$ ), 115.2 (CH), 127.7 (C), 129.7 (CH), 143.8 (C). HRMS-ESI ( $m/z$ ):  $[\text{M}+\text{H}]^+$  calcd for  $\text{C}_7\text{H}_{10}\text{N}$ , 108.0808; found, 108.0810.

***p*-Anisidine (2c).**

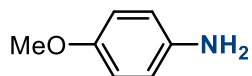

The reaction was conducted according to the general procedure A using 4-nitroanisole (**1c**, 76.2 mg, 0.5 mmol), Zn (164.8 mg, 2.5 mmol), and ammonium chloride (134.6 mg, 2.5 mmol). The resulting crude mixture was analyzed by <sup>1</sup>H NMR with dibromomethane as an internal standard to determine the NMR yield of **2c** (78%). The crude mixture was purified by silica-gel column chromatography (SiO<sub>2</sub>, EtOAc/hexane, 0:100–50:50) to afford **2c** as a brown solid (39.1 mg, 0.32 mmol, 61% yield). <sup>1</sup>H and <sup>13</sup>C NMR were in agreement with the literature.<sup>1</sup>

<sup>1</sup>H NMR (396 MHz, CDCl<sub>3</sub>, δ): 3.42 (brs, 2H), 3.75 (s, 3H), 6.63–6.69 (m, 2H), 6.72–6.77 (m, 2H). <sup>13</sup>C NMR (392 MHz, CDCl<sub>3</sub>, δ): 55.7 (CH<sub>3</sub>), 114.8 (CH), 116.4 (CH), 139.9 (C), 152.7 (C). HRMS-ESI (*m/z*): [M+H]<sup>+</sup> calcd for C<sub>7</sub>H<sub>10</sub>ON, 124.0757; found, 124.0757.

***m*-Anisidine (2d).**

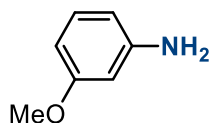

The reaction was conducted according to the general procedure A using 3-nitroanisole (**1d**, 76.0 mg, 0.5 mmol), Zn (164.1 mg, 2.5 mmol), and ammonium chloride (134.1 mg, 2.5 mmol). The resulting crude mixture was analyzed by <sup>1</sup>H NMR with dibromomethane as an internal standard to determine the NMR yield of **2d** (80%). The crude mixture was purified by silica-gel column chromatography (SiO<sub>2</sub>, EtOAc/hexane, 0:100–20:80) to afford **2d** as a brown oil (39.9 mg, 0.32 mmol, 65% yield). <sup>1</sup>H and <sup>13</sup>C NMR were in agreement with the literature.<sup>3</sup>

<sup>1</sup>H NMR (396 MHz, CDCl<sub>3</sub>, δ): 3.66 (brs, 2H), 3.76 (s, 3H), 6.24 (t, *J* = 2.4 Hz, 1H), 6.27–6.37 (m, 2H), 7.06 (t, *J* = 8.3 Hz, 1H). <sup>13</sup>C NMR (392 MHz, CDCl<sub>3</sub>, δ): 55.1 (CH<sub>3</sub>), 101.0 (CH), 103.9 (CH), 107.9 (CH), 130.1 (CH), 147.7 (C), 160.7 (C). HRMS-ESI (*m/z*): [M+H]<sup>+</sup> calcd for C<sub>7</sub>H<sub>10</sub>ON, 124.0757; found, 124.0757.

#### *o*-Anisidine (**2e**).

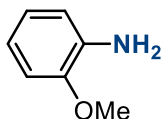

The reaction was conducted according to the general procedure A using 2-nitroanisole (**1e**, 73.6 mg, 0.5 mmol), Zn (163.7 mg, 2.5 mmol), and ammonium chloride (134.7 mg, 2.5 mmol). The resulting crude mixture was analyzed by <sup>1</sup>H NMR with dibromomethane as an internal standard to determine the NMR yield of **2e** (97%). The crude mixture was purified by silica-gel column chromatography (SiO<sub>2</sub>, EtOAc/hexane, 0:100–20:80) to afford **2e** as a yellow oil (45.3 mg, 0.37 mmol, 77% yield). <sup>1</sup>H and <sup>13</sup>C NMR were in agreement with the literature.<sup>2</sup>

<sup>1</sup>H NMR (396 MHz, CDCl<sub>3</sub>, δ): 3.74 (brs, 2H), 3.84 (s, 3H), 6.68–6.77 (m, 2H), 6.76–6.85 (m, 2H). <sup>13</sup>C NMR (392 MHz, CDCl<sub>3</sub>, δ): 55.3 (CH<sub>3</sub>), 110.3 (CH), 115.0 (CH), 118.4 (CH), 121.0 (CH), 136.1 (C), 147.2 (C). HRMS-ESI (*m/z*): [M+H]<sup>+</sup> calcd for C<sub>7</sub>H<sub>10</sub>ON, 124.0757; found, 124.0757.

#### 4-(Benzyloxy)aniline (**2f**).

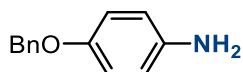

The reaction was conducted according to the general procedure A using benzyl 4-nitrophenyl ether (**1f**, 113.7 mg, 0.5 mmol), Zn (164.9 mg, 2.5 mmol), and ammonium chloride (136.6 mg, 2.6 mmol). The resulting crude mixture was analyzed by <sup>1</sup>H NMR with dibromomethane as an internal standard to determine the NMR yield of **2f** (75%). The crude mixture was purified by silica-gel column chromatography (SiO<sub>2</sub>, EtOAc/hexane, 0:100–10:90) to afford **2f** as a brown solid (62.6 mg, 0.31 mmol, 63% yield). <sup>1</sup>H and <sup>13</sup>C NMR were in agreement with the literature.<sup>4</sup>

<sup>1</sup>H NMR (401 MHz, CDCl<sub>3</sub>, δ): 3.43 (brs, 2H), 4.99 (s, 2H), 6.61–6.69 (m, 2H), 6.79–6.86 (m, 2H), 7.27–7.47 (m, 5H). <sup>13</sup>C NMR (392 MHz, CDCl<sub>3</sub>, δ): 70.7 (CH<sub>2</sub>), 116.0 (CH), 116.3 (CH), 127.5 (CH), 127.8 (CH), 128.5 (CH), 137.5 (C), 140.2 (C), 152.0 (C). HRMS-ESI (*m/z*): [M+H]<sup>+</sup> calcd for C<sub>13</sub>H<sub>14</sub>ON, 200.1070; found, 200.1065.

#### 4-(Allyloxy)aniline (**2g**).

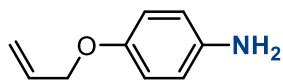

The reaction was conducted according to the general procedure A using 1-allyloxy-4-nitrobenzene (**1g**, 90.4 mg, 0.5 mmol), Zn (164.9 mg, 2.5 mmol), and ammonium chloride (135.4 mg, 2.5 mmol). The resulting crude mixture was analyzed by  $^1\text{H}$  NMR with dibromomethane as an internal standard to determine the NMR yield of **2g** (97%). The crude mixture was purified by silica-gel column chromatography ( $\text{SiO}_2$ , EtOAc/hexane, 0:100–40:60) to afford **2g** as a brown oil (63.2 mg, 0.42 mmol, 84% yield).  $^1\text{H}$  and  $^{13}\text{C}$  NMR were in agreement with the literature.<sup>5</sup>

$^1\text{H}$  NMR (401 MHz,  $\text{CDCl}_3$ ,  $\delta$ ): 3.43 (brs, 2H), 4.43–4.52 (m, 2H), 5.23–5.29 (m, 1H), 5.35–5.43 (m, 1H), 5.99–6.11 (m, 1H), 6.61–6.68 (m, 2H), 6.73–6.80 (m, 2H).  $^{13}\text{C}$  NMR (392 MHz,  $\text{CDCl}_3$ ,  $\delta$ ): 69.5 ( $\text{CH}_2$ ), 115.9 (CH), 116.3 (CH), 117.3 ( $\text{CH}_2$ ), 133.8 (CH), 140.1 (C), 151.7 (C). HRMS-ESI ( $m/z$ ):  $[\text{M}+\text{H}]^+$  calcd for  $\text{C}_9\text{H}_{12}\text{ON}$ , 150.0913; found, 150.0911.

#### 4-[(4-Bromobenzyl)oxy]aniline (**2h**).

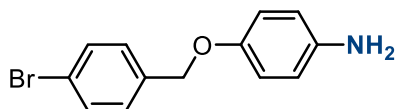

The reaction was conducted according to the general procedure A (reaction time is 60 min) using 1-bromo-4-[(4-nitrophenoxy)methyl]benzene (**1h**, 153.2 mg, 0.5 mmol), Zn (164.8 mg, 2.5 mmol), and ammonium chloride (134.6 mg, 2.5 mmol). The crude mixture was purified by silica-gel column chromatography ( $\text{SiO}_2$ , EtOAc/hexane, 0:100–20:80) to afford **2h** as a brown solid (66.6 mg, 0.24 mmol, 48% yield).

$^1\text{H}$  NMR (401 MHz,  $\text{CDCl}_3$ ,  $\delta$ ): 3.44 (brs, 2H), 4.93 (s, 2H), 6.63 (d,  $J = 8.4$  Hz, 2H), 6.78 (d,  $J = 8.8$  Hz, 2H), 7.29 (d,  $J = 7.6$  Hz, 2H), 7.49 (d,  $J = 8.4$  Hz, 2H).  $^{13}\text{C}$  NMR (392 MHz,  $\text{CDCl}_3$ ,  $\delta$ ): 70.0 ( $\text{CH}_2$ ), 116.0 (CH), 116.3 (CH), 121.6 (C), 129.1 (CH), 131.6 (CH), 136.5 (C), 140.4 (C), 151.6 (C). HRMS-ESI ( $m/z$ ):  $[\text{M}+\text{H}]^+$  calcd for  $\text{C}_{13}\text{H}_{13}\text{ONBr}$ , 278.0175; found, 278.0171.

#### 4-[(*tert*-Butyldimethylsilyl)oxy]aniline (**2i**).

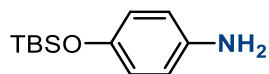

The reaction was conducted according to the general procedure A using *tert*-butyldimethyl(4-nitrophenoxy)silane (**1i**, 124.5 mg, 0.5 mmol), Zn (194.5 mg, 3.0 mmol), and ammonium chloride (137.2 mg, 2.6 mmol). The resulting crude mixture was analyzed by <sup>1</sup>H NMR with dibromomethane as an internal standard to determine the NMR yield of **2i** (99%). The crude mixture was purified by silica-gel column chromatography (SiO<sub>2</sub>, EtOAc/hexane, 0:100–10:90) to afford **2i** as a brown oil (94.0 mg, 0.42 mmol, 86% yield). <sup>1</sup>H and <sup>13</sup>C NMR were in agreement with the literature.<sup>6</sup>

<sup>1</sup>H NMR (396 MHz, CDCl<sub>3</sub>, δ): 0.15 (s, 6H), 0.97 (s, 9H), 3.40 (brs, 2H), 6.55–6.60 (m, 2H), 6.63–6.68 (m, 2H). <sup>13</sup>C NMR (392 MHz, CDCl<sub>3</sub>, δ): –4.5 (CH<sub>3</sub>), 18.1 (C), 25.7 (CH<sub>3</sub>), 116.2 (CH), 120.6 (CH), 140.2 (C), 148.1 (C). HRMS-ESI (*m/z*): [M+H]<sup>+</sup> calcd for C<sub>12</sub>H<sub>22</sub>ONSi, 224.1465; found, 224.1459.

#### 1,4-Diaminobenzene (**2j**).

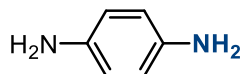

The reaction was conducted according to the general procedure A (work up was carried out by passing through a short silica gel column eluting with EtOAc) using 4-nitro-aniline (**1j**, 69.3 mg, 0.5 mmol), Zn (161.5 mg, 2.5 mmol), and ammonium chloride (135.4 mg, 2.5 mmol). The crude mixture was evaporated under a vacuum, after removal of the solvents under reduced pressure to afford **2j** as a brown solid (28.7 mg, 0.27 mmol, 53% yield). <sup>1</sup>H and <sup>13</sup>C NMR were in agreement with the literature.<sup>1</sup> <sup>1</sup>H NMR (401 MHz, CDCl<sub>3</sub>, δ): 3.33 (brs, 4H), 6.52–6.63 (m, 4H). <sup>13</sup>C NMR (392 MHz, CDCl<sub>3</sub>, δ): 116.7 (CH), 138.5 (C). HRMS-ESI (*m/z*): [M+H]<sup>+</sup> calcd for C<sub>6</sub>H<sub>9</sub>N<sub>2</sub>, 109.0760; found, 109.0757.

#### 1,1'-Biphenyl-2,2'-diamine (**2k**).

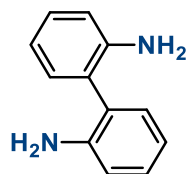

The reaction was conducted according to the general procedure A using 1-nitro-2-(2-nitrophenyl)benzene (**1k**, 122.5 mg, 0.5 mmol), Zn (325.5 mg, 5.0 mmol), and ammonium chloride (267.1 mg, 5.0 mmol). The resulting crude mixture was analyzed by <sup>1</sup>H NMR with dibromomethane

as an internal standard to determine the NMR yield of **2k** (94%). The crude mixture was purified by silica-gel column chromatography (SiO<sub>2</sub>, EtOAc/CH<sub>2</sub>Cl<sub>2</sub>, 0:100–5:95) to afford **2k** as a white solid (71.5 mg, 0.39 mmol, 77% yield). <sup>1</sup>H and <sup>13</sup>C NMR were in agreement with the literature.<sup>7</sup>

<sup>1</sup>H NMR (396 MHz, CDCl<sub>3</sub>, δ): 3.71 (brs, 4H), 6.79 (dd, *J* = 0.79 Hz, 8.3 Hz, 2H), 6.84 (td, *J* = 1.6 Hz, 7.3 Hz, 2H), 7.13 (dd, *J* = 1.6 Hz, 7.7 Hz, 2H), 7.18 (td, *J* = 1.2 Hz, 7.7 Hz, 2H). <sup>13</sup>C NMR 392 MHz, CDCl<sub>3</sub>, δ): 115.5 (CH), 118.7 (CH), 124.5 (C), 128.8 (CH), 131.0 (CH), 144.1 (C). HRMS-ESI (*m/z*): [M+H]<sup>+</sup> calcd for C<sub>12</sub>H<sub>13</sub>N<sub>2</sub>, 185.1073; found, 185.1071.

#### 4-Fluoroaniline (**2l**).

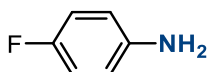

The reaction was conducted according to the general procedure B using 4-fluoronitrobenzene (**1l**, 69.8 mg, 0.5 mmol), Zn (165.3 mg, 2.5 mmol), and ammonium chloride (133.4 mg, 2.5 mmol). The resulting crude mixture was analyzed by <sup>1</sup>H NMR with dibromomethane as an internal standard to determine the NMR yield of **2l** (65%). Because of the low boiling point of the product, only crude NMR yield was collected. <sup>1</sup>H was in agreement with the literature.<sup>2</sup>

<sup>1</sup>H NMR (401 MHz, CDCl<sub>3</sub>, δ): 3.54 (brs, 2H), 6.59–6.67 (m, 2H), 6.81–6.90 (m, 2H).

#### 3-Fluoroaniline (**2m**).

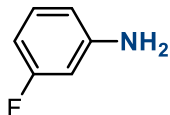

The reaction was conducted according to the general procedure B using 3-fluoronitrobenzene (**1m**, 69.0 mg, 0.5 mmol), Zn (165.7 mg, 2.5 mmol), and ammonium chloride (135.7 mg, 2.5 mmol). The resulting crude mixture was analyzed by <sup>1</sup>H NMR with dibromomethane as an internal standard to determine the NMR yield of **2m** (85%). Because of the low boiling point of the product, only crude NMR yield was collected. <sup>1</sup>H was in agreement with the literature.<sup>2</sup>

<sup>1</sup>H NMR (401 MHz, CDCl<sub>3</sub>, δ): 3.76 (brs, 2H), 6.38 (dt, *J* = 2.4 Hz, 10.7 Hz, 1H), 6.40–6.48 (m, 2H), 7.04–7.12 (m, 1H).

### 2-Fluoroaniline (**2n**).

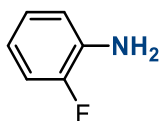

The reaction was conducted according to the general procedure B using 2-fluoronitrobenzene (**1n**, 69.1 mg, 0.5 mmol), Zn (163.7 mg, 2.5 mmol), and ammonium chloride (132.9 mg, 2.5 mmol). The resulting crude mixture was analyzed by  $^1\text{H}$  NMR with dibromomethane as an internal standard to determine the NMR yield of **2n** (89%). Because of the low boiling point of the product, only crude NMR yield was collected.  $^1\text{H}$  was in agreement with the literature.<sup>2</sup>

$^1\text{H}$  NMR (401 MHz,  $\text{CDCl}_3$ ,  $\delta$ ): 3.71 (brs, 2H), 6.65–6.74 (m, 1H), 6.74–6.82 (m, 1H), 6.89–7.03 (m, 2H).

### 3,4-Dichloroaniline (**2o**).

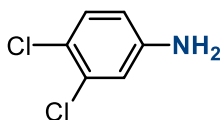

The reaction was conducted according to the general procedure A using 3,4-dichloronitrobenzene (**1o**, 96.5 mg, 0.5 mmol), Zn (165.0 mg, 2.5 mmol), and ammonium chloride (134.0 mg, 2.5 mmol). The resulting crude mixture was analyzed by  $^1\text{H}$  NMR with dibromomethane as an internal standard to determine the NMR yield of **2o** (96%). The crude mixture was purified by silica-gel column chromatography ( $\text{SiO}_2$ , EtOAc/hexane, 0:100–15:85) to afford **2o** as a yellow solid (66.4 mg, 0.41 mmol, 82% yield).  $^1\text{H}$  and  $^{13}\text{C}$  NMR were in agreement with the literature.<sup>8</sup>

$^1\text{H}$  NMR (401 MHz,  $\text{CDCl}_3$ ,  $\delta$ ): 3.72 (brs, 2H), 6.51 (dd,  $J = 2.4$  Hz, 8.2 Hz, 1H), 6.77 (d,  $J = 2.8$  Hz, 1H), 7.17 (d,  $J = 8.4$  Hz, 1H).  $^{13}\text{C}$  NMR (99 MHz,  $\text{CDCl}_3$ ,  $\delta$ ): 114.6 (CH), 116.4 (CH), 121.0 (C), 130.7 (CH), 132.6 (C), 146.0 (C). HRMS-EI ( $m/z$ ):  $[\text{M}]^+$  calcd for  $\text{C}_6\text{H}_5\text{Cl}_2\text{N}$ , 160.9794; found, 160.9795.

### 2-Carbomethoxyaniline (**2p**).

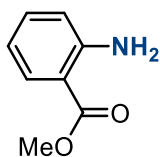

The reaction was conducted according to the general procedure A using methyl 2-nitrobenzoate (**1p**, 89.7 mg, 0.5 mmol), Zn (167.5 mg, 2.6 mmol), and ammonium chloride (135.2 mg, 2.5 mmol). The resulting crude mixture was analyzed by  $^1\text{H}$  NMR with dibromomethane as an internal standard to determine the NMR yield of **2p** (97%). The crude mixture was purified by silica-gel column chromatography ( $\text{SiO}_2$ , EtOAc/hexane, 0:100–20:80) to afford **2p** as a yellow oil (65.4 mg, 0.43 mmol, 87% yield).  $^1\text{H}$  and  $^{13}\text{C}$  NMR were in agreement with the literature.<sup>9</sup>

$^1\text{H}$  NMR (401 MHz,  $\text{CDCl}_3$ ,  $\delta$ ): 3.87 (s, 3H), 5.71 (brs, 2H), 6.61–6.69 (m, 2H), 7.23–7.29 (m, 1H), 7.85 (dd,  $J = 1.6$  Hz, 8.2 Hz, 1H).  $^{13}\text{C}$  NMR (392 MHz,  $\text{CDCl}_3$ ,  $\delta$ ): 51.5 ( $\text{CH}_3$ ), 110.7 (C), 116.2 (CH), 116.6 (CH), 131.2 (CH), 134.0 (CH), 150.4 (C), 168.6 (C). HRMS-ESI ( $m/z$ ):  $[\text{M}+\text{H}]^+$  calcd for  $\text{C}_8\text{H}_{10}\text{O}_2\text{N}$ , 152.0706; found, 152.0704.

### 2,6-Dimethylaniline (**2q**).

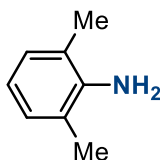

The reaction was conducted according to the general procedure A using 2,6-dimethylnitrobenzene (**1q**, 75.0 mg, 0.5 mmol), Zn (166.5 mg, 2.5 mmol), and ammonium chloride (135.5 mg, 2.5 mmol). The resulting crude mixture was analyzed by  $^1\text{H}$  NMR with dibromomethane as an internal standard to determine the NMR yield of **2q** (>99%). The crude mixture was purified by silica-gel column chromatography ( $\text{SiO}_2$ , EtOAc/hexane, 0:100–20:80) to afford **2q** as a pale yellow oil (50.7 mg, 0.42 mmol, 84% yield).  $^1\text{H}$  and  $^{13}\text{C}$  NMR were in agreement with the literature.<sup>3</sup>

$^1\text{H}$  NMR (401 MHz,  $\text{CDCl}_3$ ,  $\delta$ ): 2.18 (s, 6H), 3.55 (brs, 2H), 6.64 (t,  $J = 7.6$  Hz, 1H), 6.94 (d,  $J = 7.6$  Hz, 2H).  $^{13}\text{C}$  NMR (392 MHz,  $\text{CDCl}_3$ ,  $\delta$ ): 17.6 ( $\text{CH}_3$ ), 117.9 (CH), 121.6 (C), 128.2 (CH), 142.7 (C). HRMS-ESI ( $m/z$ ):  $[\text{M}+\text{H}]^+$  calcd for  $\text{C}_8\text{H}_{12}\text{N}$ , 122.0964; found, 122.0965.

**4-Chloro-1,2-phenylenediamine (2r).**

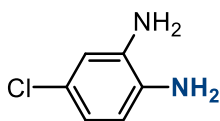

The reaction was conducted according to the general procedure A using 5-chloro-2-nitroaniline (**1r**, 86.4 mg, 0.5 mmol), Zn (162.3 mg, 2.5 mmol), and ammonium chloride (134.3 mg, 2.5 mmol). The resulting crude mixture was analyzed by  $^1\text{H}$  NMR with dibromomethane as an internal standard to determine the NMR yield of **2r** (77%). The crude mixture was purified by silica-gel column chromatography ( $\text{SiO}_2$ ,  $\text{MeOH}/\text{CH}_2\text{Cl}_2$ , 0:100–3:97) to afford **2r** as a brown solid (48.9 mg, 0.34 mmol, 70% yield).  $^1\text{H}$  and  $^{13}\text{C}$  NMR were in agreement with the literature.<sup>10</sup>

$^1\text{H}$  NMR (396 MHz,  $\text{CDCl}_3$ ,  $\delta$ ): 3.40 (brs, 4H), 6.59–6.71 (m, 3H).  $^{13}\text{C}$  NMR (392 MHz,  $\text{CDCl}_3$ ,  $\delta$ ): 116.2 (CH), 117.5 (CH), 119.6 (CH), 124.8 (C), 133.0 (C), 136.1 (C). HRMS-ESI ( $m/z$ ):  $[\text{M}+\text{H}]^+$  calcd for  $\text{C}_6\text{H}_8\text{N}_2\text{Cl}$ , 143.0371; found, 143.0368.

## 7. References

1. Choi, K.; Brunn, J. N.; Borate, K.; Kaduskar, R.; Pueyo, C. L.; Shinde, H.; Goetz, R.; Hartwig, J. F. *J. Am. Chem. Soc.* **2024**, *146*, 19414–19424.
2. Li, H.; Yuan, Z.; Chen, W.; Yang, M.; Sun, Y.; Zhang, S.; Ma, P.; Wang, J.; Niu, J. *J. Mater. Chem. A.* **2023**, *11*, 10813–10822
3. Kancherla, R.; Muralirajan, K.; Dutta, S.; Pal, K.; Li, B.; Maity, B.; Cavallo, L.; Rueping, M. *Angew. Chem. Int. Ed.* **2024**, *63*, e202314508.
4. Cheung, C. W.; Surry, D. S.; Buchwald, S. L. *Org. Lett.* **2013**, *15*, 3734–3737.
5. Orlandi, M.; Toshi, F.; Bonsignore, M. Benaglia, M. *Org. Lett.* **2015**, *17*, 3941–3943
6. Maeda, K.; Matsubara, R.; Hayashi, M.; *Org. Lett.* **2021**, *23*, 1530–1534.
7. Shi, Y.; Liu, J.; Yang, Y.; You, J.; *Chem. Commun.* **2019**, *55*, 5475–5478.
8. Behnke, N. E.; Kwon, Y. D.; Davenport, M. T.; Ess, D. H.; Kurti, Laszlo.; *J. Org. Chem.* **2023**, *88*, 11847–11854.
9. Powell, A. B.; Stahl, S. S.; *Org. Lett.* **2013**, *15*, 5072–5075.
10. Goyal, V.; Bhatt, T.; Dewangan, C.; Narani, A.; Naik, G.; Balaraman, E.; Natte, K.; Jagadeesh, R. V. *J. Org. Chem.* **2023**, *88*, 2245–2259.

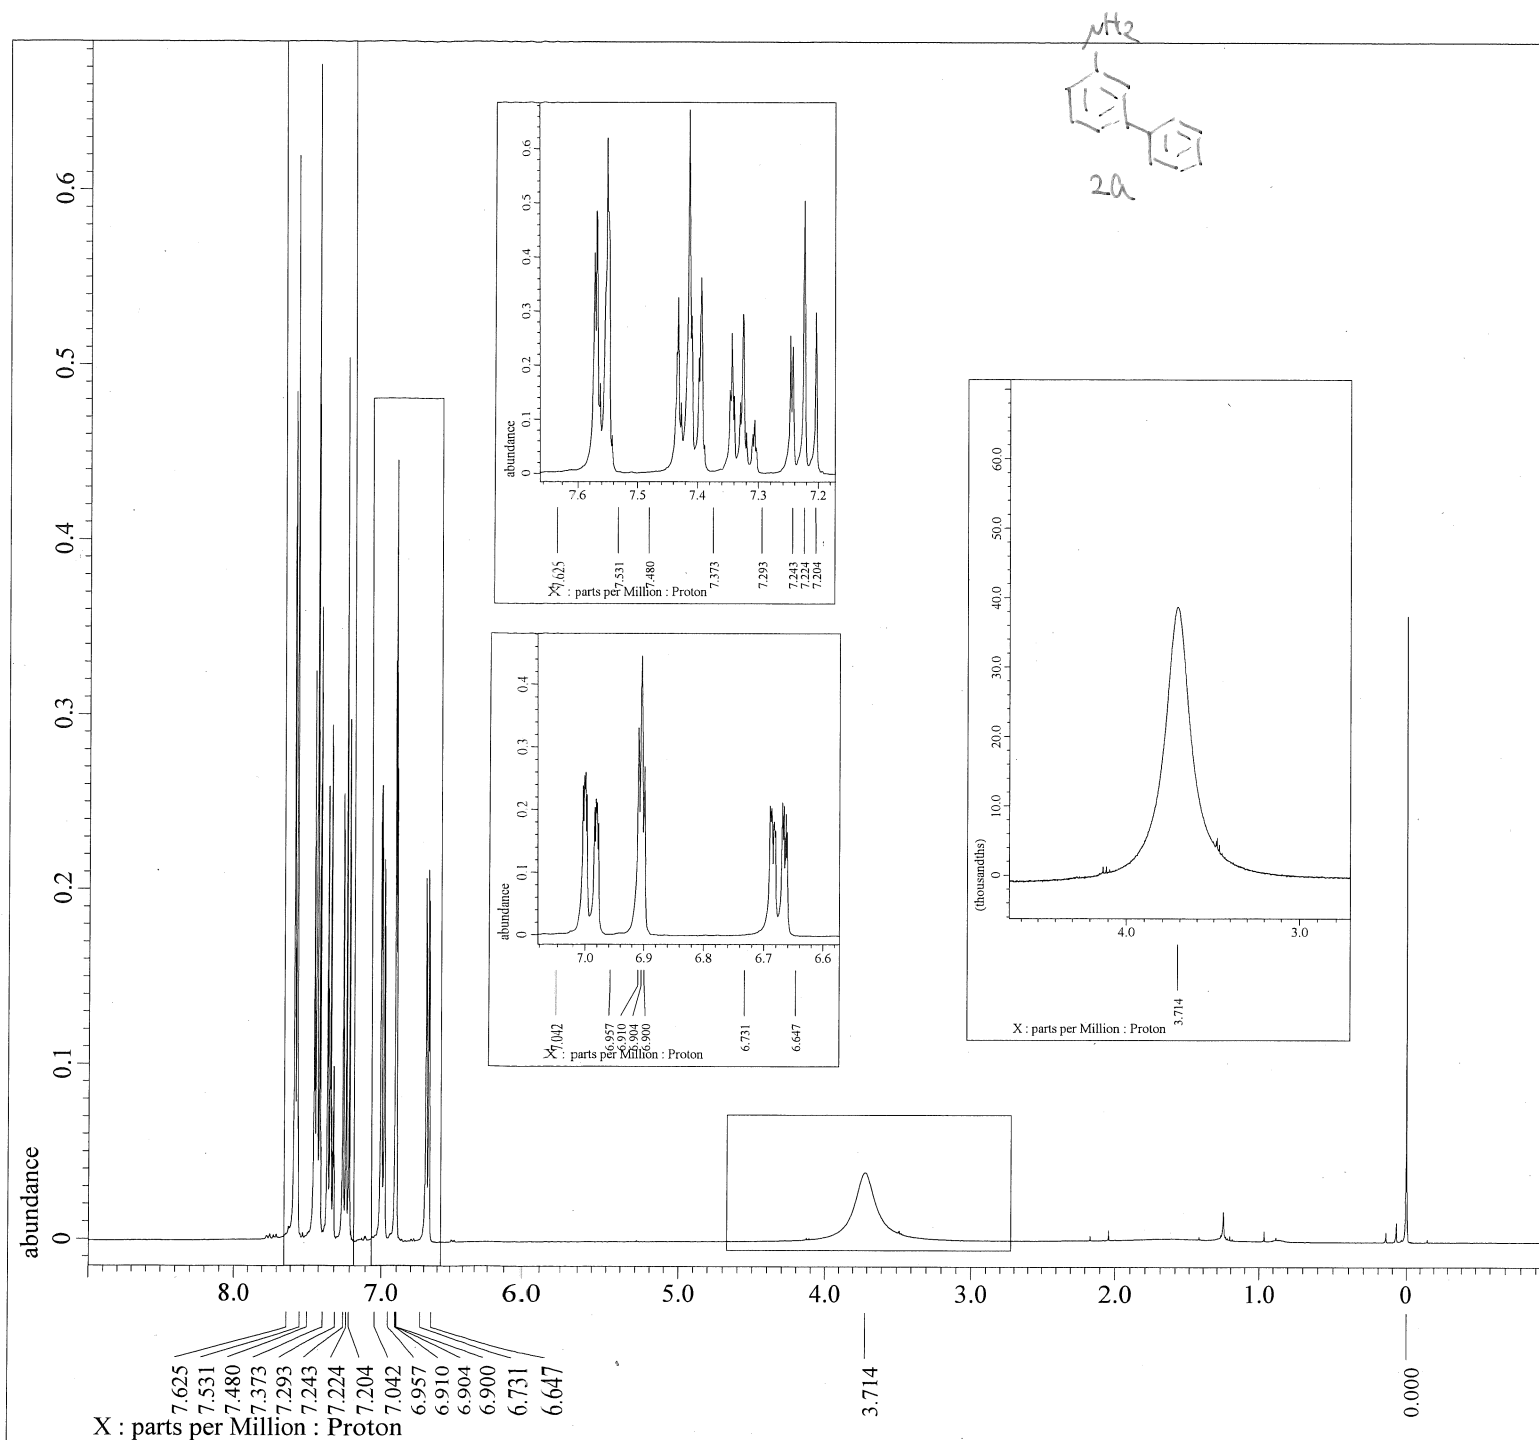

```

---- PROCESSING PARAMETERS ----
sext( 0.2[Hz], 0.0[s] )
trapezoid( 0[%], 0[%], 80[%], 100[%] )
zerofill( 1 )
fft( 1, TRUE, TRUE )
machinephase
ppm

Derived from: ASH-125-pure 1_Proton-1-1.jdf

Filename      = ASH-125-pure 1_Proton
Author        = element
Experiment    = proton_auto.jxp
Sample Id     = ASH-125-pure 1
Solvent       = CHLOROFORM-D
Actual_Start_Time = 5-AUG-2024 14:48:09
Revision_Time  = 12-NOV-2024 09:21:10

Comment       = single_pulse
Data_Format   = 1D COMPLEX
Dim_Size      = 13107
X_Domain      = Proton
Dim_Title     = Proton
Dim_Units     = [ppm]
Dimensions    = X
Spectrometer  = DELTA2_NMR

Field_Strength = 9.2982153[T] (400[MHz]
X_Acq_Duration = 2.20725248[s]
X_Domain       = Proton
X_Freq         = 395.88430144[MHz]
X_Offset       = 5[ppm]
X_Points       = 16384
X_Prescans     = 1
X_Resolution   = 0.45305193[Hz]
X_Sweep        = 7.42280285[kHz]
X_Sweep_Clippped = 5.93824228[kHz]
Irr_Domain     = Proton
Irr_Freq       = 395.88430144[MHz]
Irr_Offset     = 5[ppm]
Tri_Domain     = Proton
Tri_Freq       = 395.88430144[MHz]
Tri_Offset     = 5[ppm]
Blanking       = 2[us]
Clipped        = FALSE
Scans          = 8
Total_Scans    = 8

Relaxation_Delay = 5[s]
Recvr_Gain       = 46
Temp_Get        = 21.1[dC]
X_90_Width      = 6.34[us]
X_Acq_Time      = 2.20725248[s]
X_Angle         = 45[deg]
X_Atn           = 5[dB]
X_Pulse         = 3.17[us]
Irr_Mode        = Off
Tri_Mode        = Off
Dante_Loop      = 500
Dante_Presat    = FALSE
Decimation_Rate = 0
Experiment_Path = C:\Program Files\JEOL
Initial_Wait     = 1[s]
Phase           = {0, 90, 270, 180, 180
Presat_Time     = 5[s]
  
```

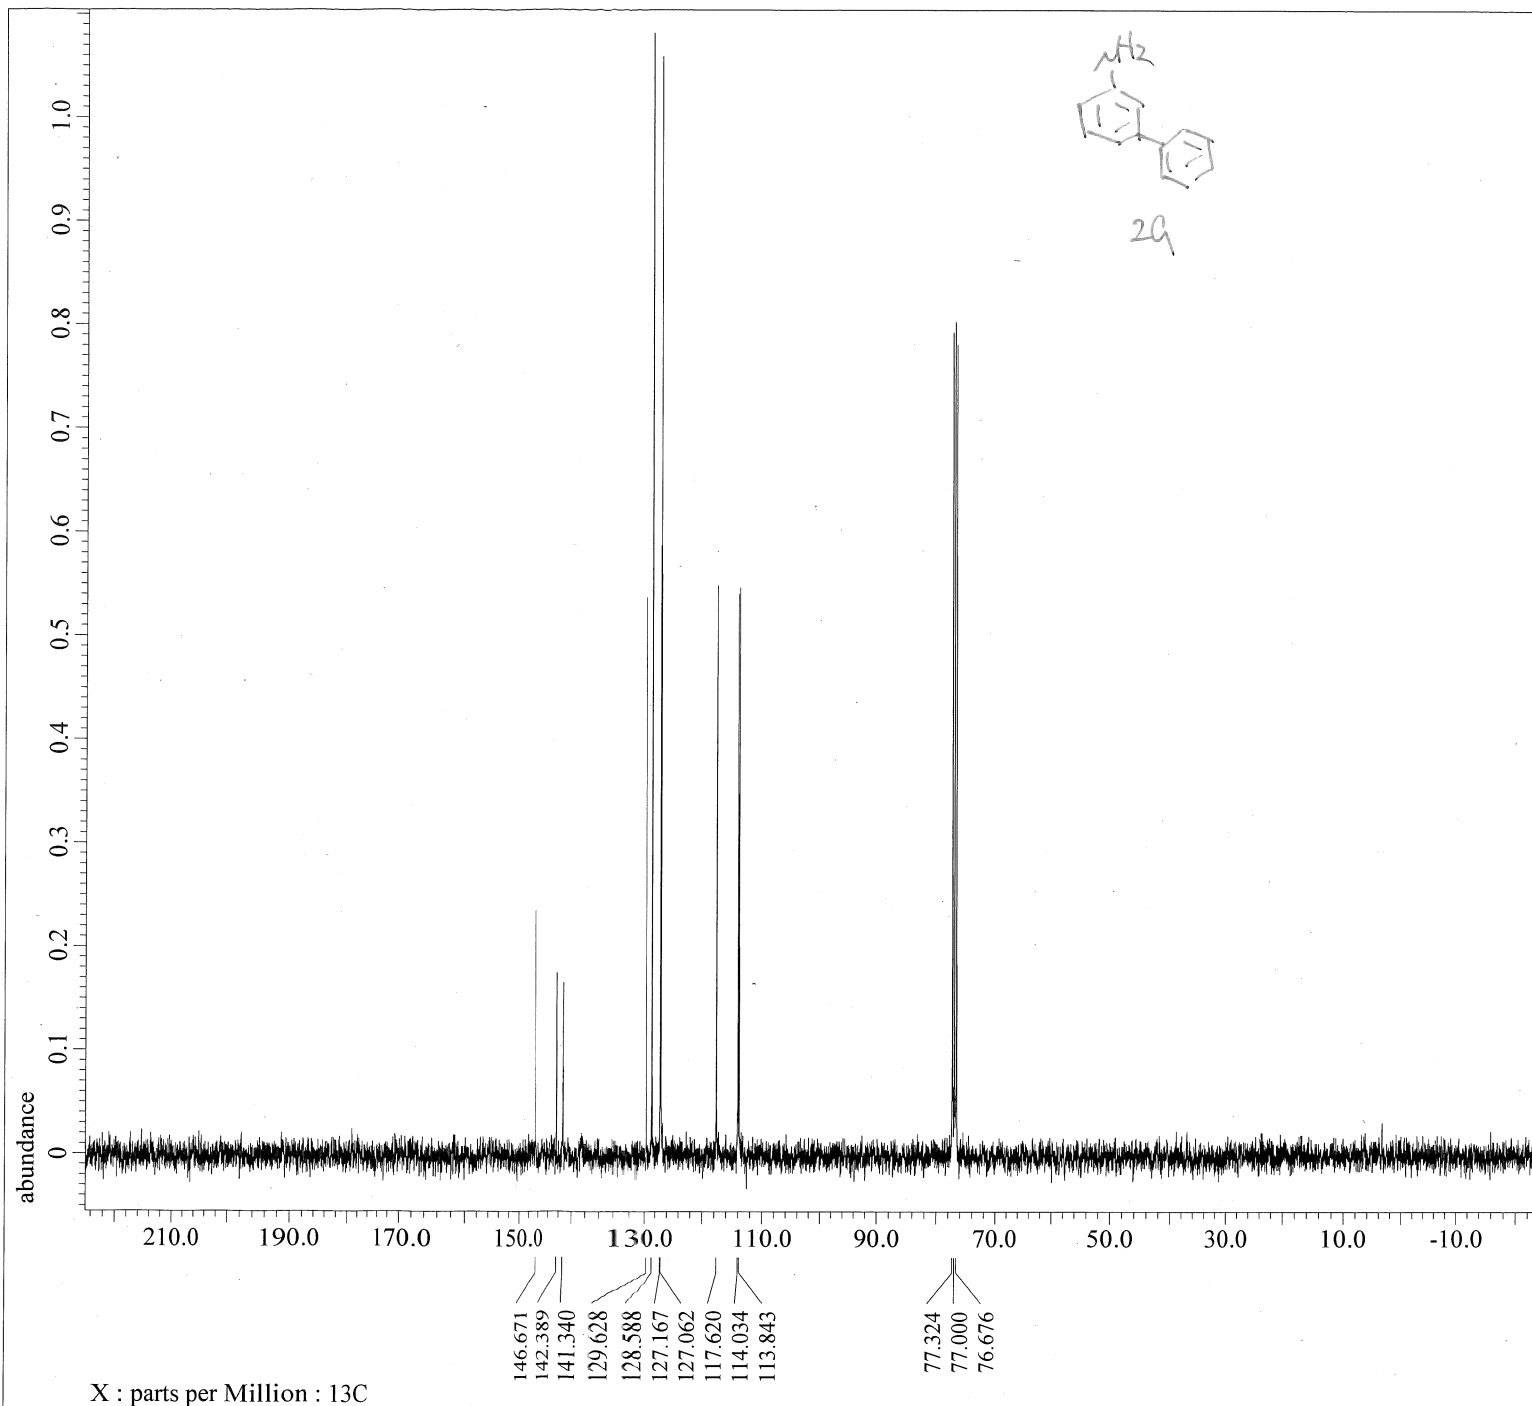

----- PROCESSING PARAMETERS -----  
dc balance( 0, FALSE )  
sexp( 2.0[Hz], 0.0[s] )  
trapezoid3( 0[%], 80[%], 100[%] )  
zerofill( 1 )  
fft( 1, TRUE, TRUE )  
machinephase  
ppm

Derived from: ASH-125-13C-1.jdf

Filename = ASH-125-13C-2.jdf  
Author = element  
Experiment = single\_pulse\_dec  
Sample Id = 1  
Solvent = CHLOROFORM-D  
Actual\_Start\_Time = 5-AUG-2024 21:36:49  
Revision\_Time = 5-AUG-2024 15:33:37

Comment = single pulse decoupled ga  
Data Format = 1D COMPLEX  
Dim Size = 26214  
X Domain = 13C  
Dim Title = 13C  
Dim Units = [ppm]  
Dimensions = X  
Site = ECS 400  
Spectrometer = JNM-ECS400

Field Strength = 9.20197068[T] (390[MHz])  
X Acq\_Duration = 1.06430464[s]  
X\_Domain = 13C  
X Freq = 98.51479726[MHz]  
X Offset = 100[ppm]  
X\_Points = 32768  
X Prescans = 4  
X Resolution = 0.93958061[Hz]  
X Sweep = 30.78817734[kHz]  
Irr\_Domain = 1H  
Irr\_Freq = 391.78655441[MHz]  
Irr\_Offset = 5[ppm]  
Clipped = FALSE  
Scans = 75  
Total\_Scans = 75

Relaxation\_Delay = 2[s]  
Recvr\_Gain = 60  
Temp\_Get = 22.4[dC]  
X\_90\_Width = 9.46[us]  
X Acq\_Time = 1.06430464[s]  
X\_Angle = 30[deg]  
X\_Atn = 4.9[dB]  
X\_Pulse = 3.15333333[us]  
Irr\_Atn\_Dec = 22.45[dB]  
Irr\_Atn\_No = 22.45[dB]  
Irr\_Noise = WALTZ  
Decoupling = TRUE  
Initial\_Wait = 1[s]  
Noe = TRUE  
Noe\_Time = 2[s]  
Repetition\_Time = 3.06430464[s]

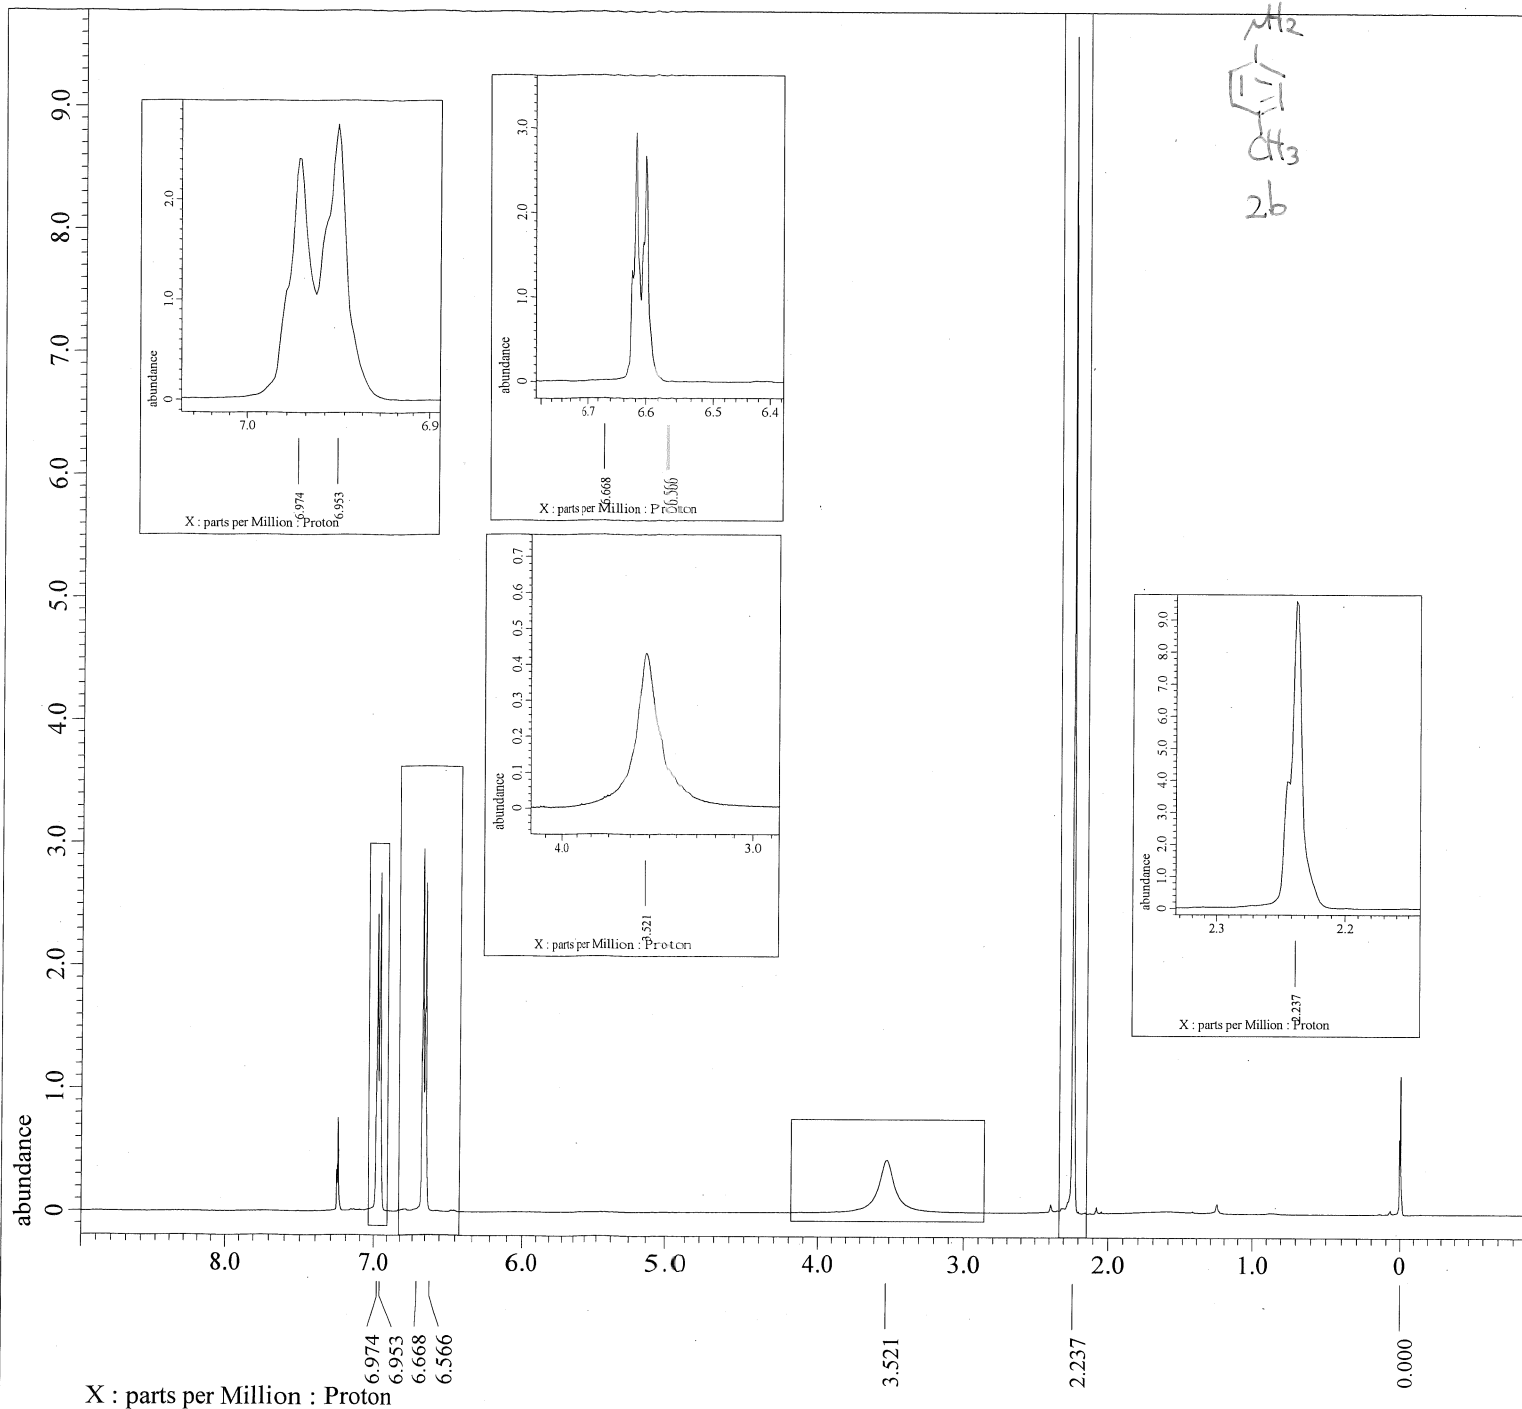

----- PROCESSING PARAMETERS -----

```

dc_balance( 0, FALSE )
sexp( 0.2[Hz], 0.0[s] )
trapezoid( 0[%], 0[%], 80[%], 100[%] )
zerofill( 1 )
fft( 1, TRUE, TRUE )
machinephase
ppm

```

Derived from: ASH-116-pure2\_Proton-1-1.jdf

Filename = ASH-116-pure2\_Proton-1-2.  
 Author = element  
 Experiment = proton.jxp  
 Sample\_Id = ASH-116-pure2  
 Solvent = CHLOROFORM-D  
 Actual\_Start\_Time = 26-JUL-2024 12:17:09  
 Revision\_Time = 12-NOV-2024 09:23:56

Comment = single\_pulse  
 Data Format = 1D COMPLEX  
 Dim\_Size = 13107  
 X\_Domain = Proton  
 Dim Title = Proton  
 Dim Units = [ppm]  
 Dimensions = X  
 Spectrometer = DELTA2\_NMR

Field Strength = 9.4073814[T] (400[MHz])  
 X\_Acq\_Duration = 2.18103808[s]  
 X\_Domain = 1H  
 X\_Freq = 400.53219825[MHz]  
 X\_Offset = 5[ppm]  
 X\_Points = 16384  
 X\_Prescans = 1  
 X\_Resolution = 0.45849727[Hz]  
 X\_Sweep = 7.51201923[kHz]  
 X\_Sweep\_Clippped = 6.00961538[kHz]  
 Irr\_Domain = Proton  
 Irr\_Freq = 400.53219825[MHz]  
 Irr\_Offset = 5[ppm]  
 Tri\_Domain = Proton  
 Tri\_Freq = 400.53219825[MHz]  
 Tri\_Offset = 5[ppm]  
 Clipped = FALSE  
 Scans = 8  
 Total\_Scans = 8

Relaxation\_Delay = 5[s]  
 Recvr\_Gain = 42  
 Temp\_Get = 21[dC]  
 X\_90\_Width = 6.7[us]  
 X\_Acq\_Time = 2.18103808[s]  
 X\_Angle = 45[deg]  
 X\_Atn = 0.8[dB]  
 X\_Pulse = 3.35[us]  
 Irr\_Mode = Off  
 Tri\_Mode = Off  
 Dante\_Presat = FALSE  
 Initial\_Wait = 1[s]  
 Repetition\_Time = 7.18103808[s]

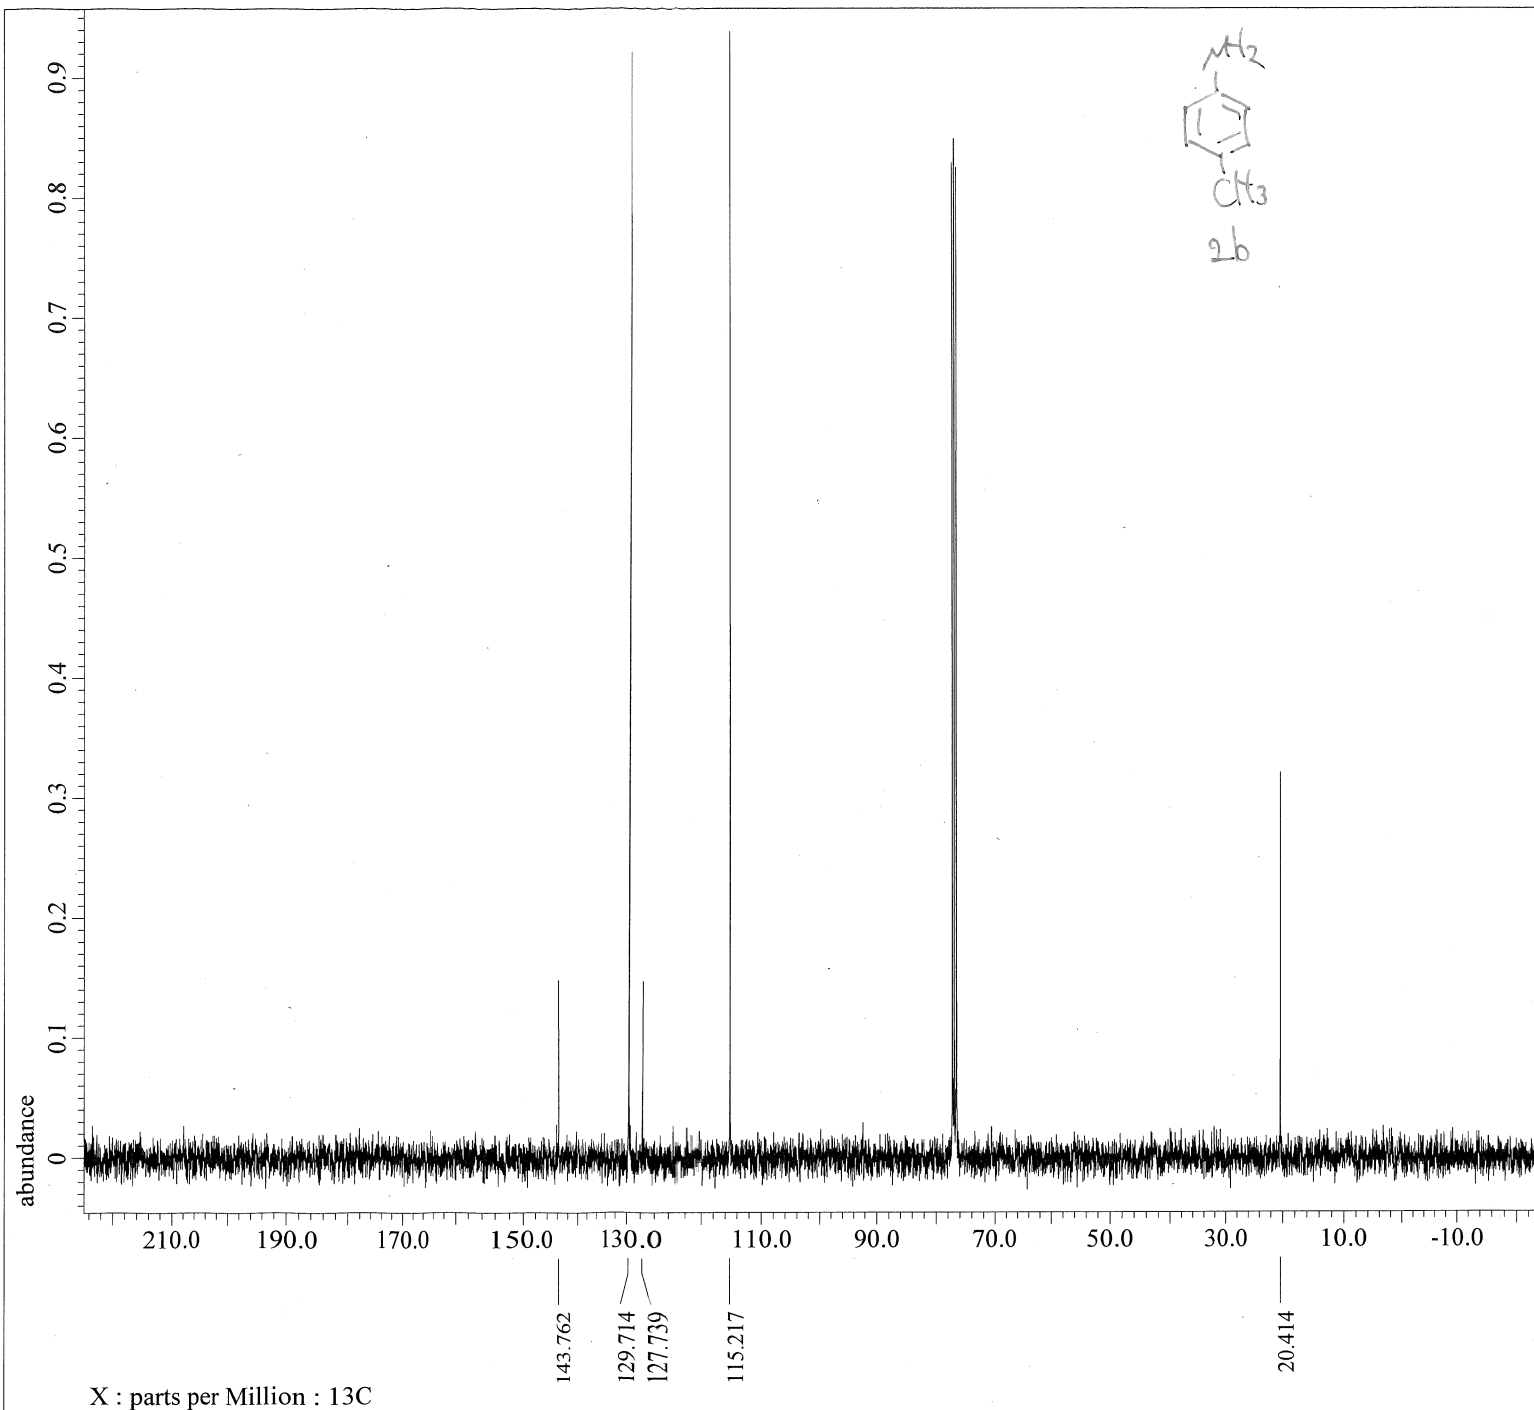

----- PROCESSING PARAMETERS -----

dc\_balance( 0, FALSE )  
sexp( 2.0[Hz], 0.0[s] )  
trapezoid3( 0[%], 80[%], 100[%] )  
zerofill( 1 )  
fft( 1, TRUE, TRUE )  
machinephase  
ppm

Derived from: ASH-116-13C-1.jdf

Filename = ASH-116-13C-2.jdf  
Author = element  
Experiment = single\_pulse\_dec  
Sample Id = S#438993  
Solvent = CHLOROFORM-D  
Actual\_Start\_Time = 26-JUL-2024 18:29:43  
Revision\_Time = 12-NOV-2024 11:08:00

Comment = single pulse decoupled ga  
Data\_Format = 1D COMPLEX  
Dim\_Size = 26214  
X\_Domain = 13C  
Dim\_Title = 13C  
Dim\_Units = [ppm]  
Dimensions = X  
Site = ECS 400  
Spectrometer = JNM-ECS400

Field\_Strength = 9.20197068[T] (390[MHz])  
X\_Acq\_Duration = 1.06430464[s]  
X\_Domain = 13C  
X\_Freq = 98.51479726[MHz]  
X\_Offset = 100[ppm]  
X\_Points = 32768  
X\_Prescans = 4  
X\_Resolution = 0.93958061[Hz]  
X\_Sweep = 30.78817734[kHz]  
Irr\_Domain = 1H  
Irr\_Freq = 391.78655441[MHz]  
Irr\_Offset = 5[ppm]  
Clipped = FALSE  
Scans = 69  
Total\_Scans = 69

Relaxation\_Delay = 2[s]  
Recvr\_Gain = 60  
Temp\_Get = 23.1[dC]  
X\_90\_Width = 9.46[us]  
X\_Acq\_Time = 1.06430464[s]  
X\_Angle = 30[deg]  
X\_Atn = 4.9[dB]  
X\_Pulse = 3.15333333[us]  
Irr\_Atn\_Dec = 22.45[dB]  
Irr\_Atn\_Noe = 22.45[dB]  
Irr\_Noise = WALTZ  
Decoupling = TRUE  
Initial\_Wait = 1[s]  
Noe = TRUE  
Noe\_Time = 2[s]  
Repetition\_Time = 3.06430464[s]

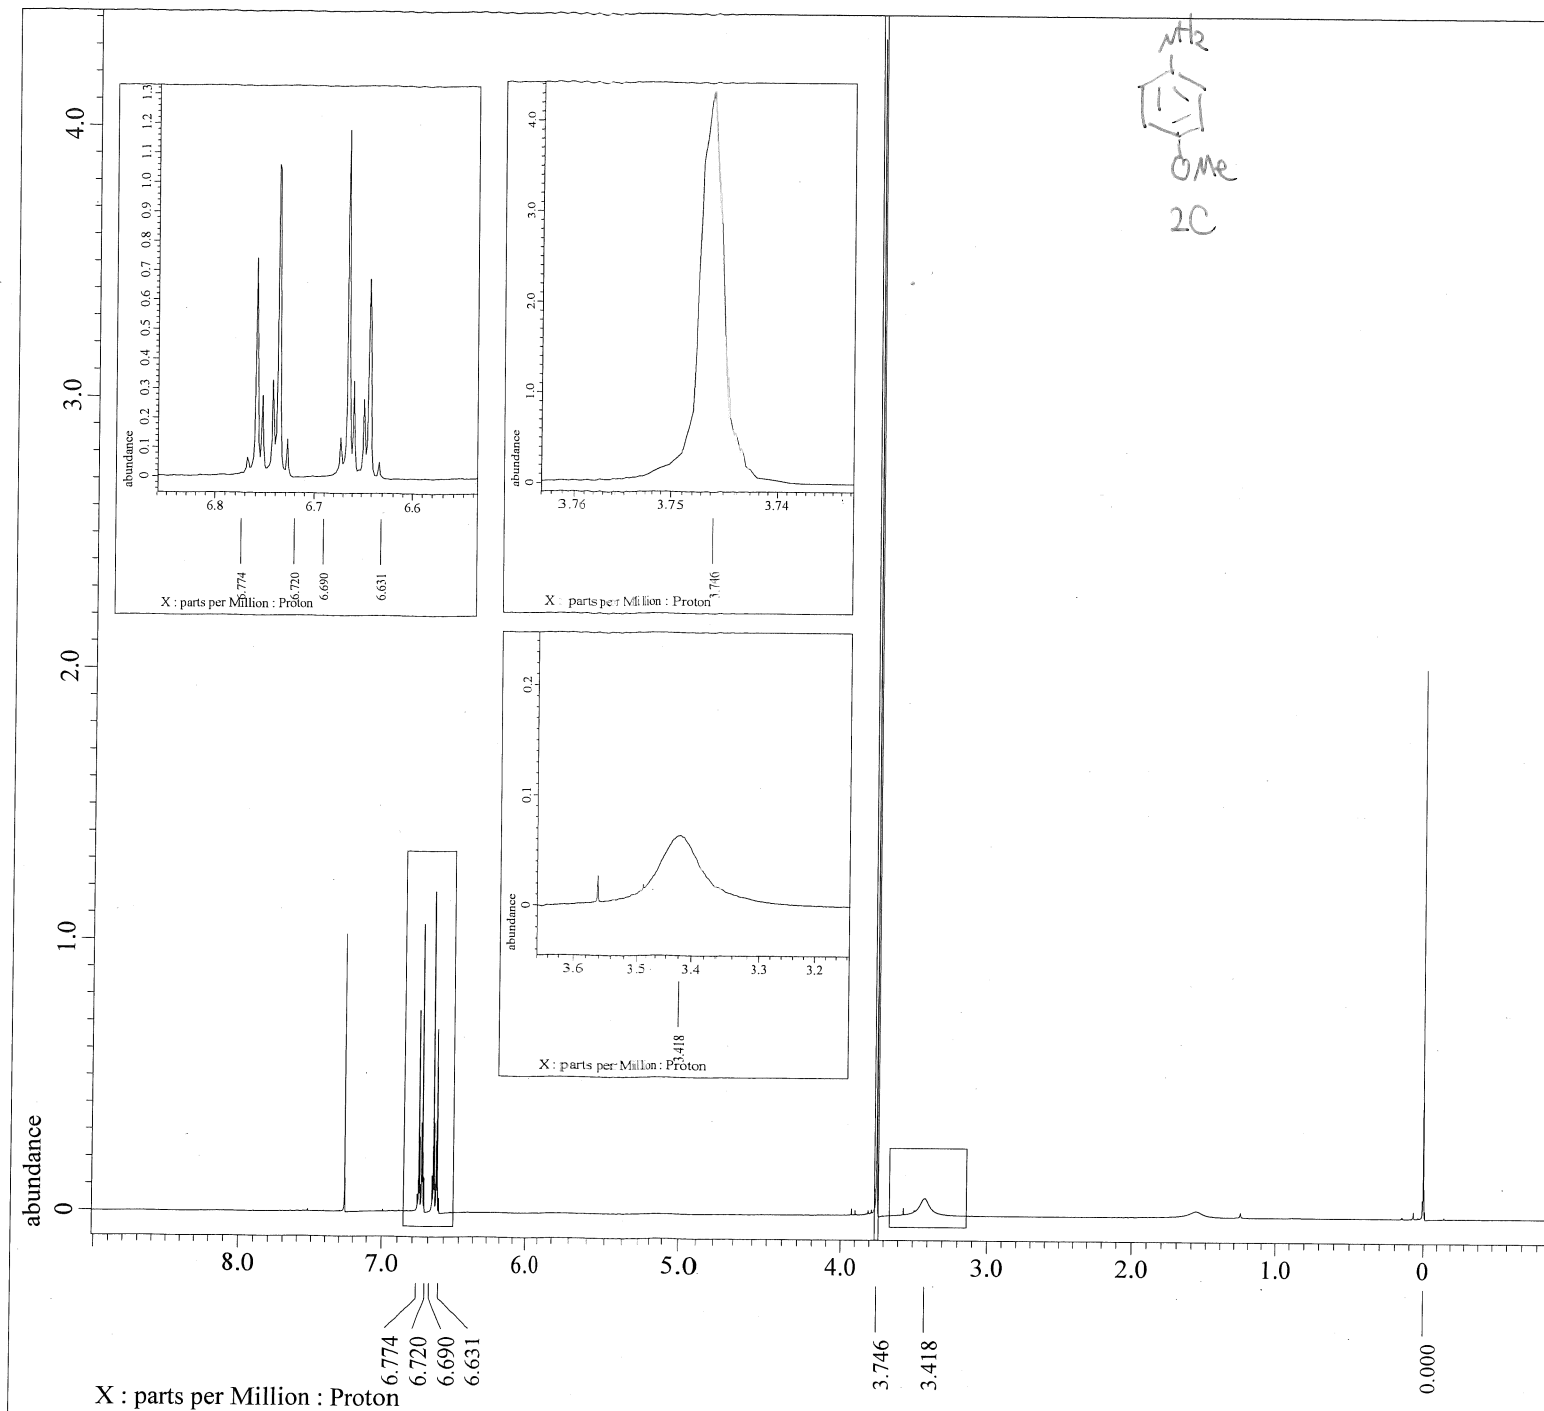

----- PROCESSING PARAMETERS -----  
 sexp( 0.2[Hz], 0.0[s] )  
 trapezoid( 0[%], 0[%], 80[%], 100[%] )  
 zerofill( 1 )  
 fft( 1, TRUE, TRUE )  
 machinephase  
 ppm

Derived from: ASH-113-re2\_Proton-1-1.jdf

Filename = ASH-113-re2\_Proton-1-  
 Author = element  
 Experiment = proton auto.jxp  
 Sample Id = ASH-113-re2  
 Solvent = CHLOROFORM-D  
 Actual\_Start\_Time = 19-OCT-2024 16:19:53  
 Revision\_Time = 12-NOV-2024 09:31:09

Comment = single\_pulse  
 Data\_Format = 1D COMPLEX  
 Dim\_Size = 13107  
 X\_Domain = Proton  
 Dim\_Title = Proton  
 Dim\_Units = [ppm]  
 Dimensions = X  
 Spectrometer = DELTA2\_NMR

Field Strength = 9.2982153[T] (400[MHz]  
 X\_Acq\_Duration = 2.20725248[s]  
 X\_Domain = Proton  
 X\_Freq = 395.88430144[MHz]  
 X\_Offset = 5[ppm]  
 X\_Points = 16384  
 X\_Prescans = 1  
 X\_Resolution = 0.45305193[Hz]  
 X\_Sweep = 7.42280285[kHz]  
 X\_Sweep\_Clippped = 5.93824228[kHz]  
 Irr\_Domain = Proton  
 Irr\_Freq = 395.88430144[MHz]  
 Irr\_Offset = 5[ppm]  
 Tri\_Domain = Proton  
 Tri\_Freq = 395.88430144[MHz]  
 Tri\_Offset = 5[ppm]  
 Blanking = 2[us]  
 Clipped = FALSE  
 Scans = 8  
 Total\_Scans = 8

Relaxation\_Delay = 5[s]  
 Recvr\_Gain = 56  
 Temp\_Get = 20.7[dC]  
 X\_90\_Width = 6.34[us]  
 X\_Acq\_Time = 2.20725248[s]  
 X\_Angle = 45[deg]  
 X\_Atn = 5[dB]  
 X\_Pulse = 3.17[us]  
 Irr\_Mode = Off  
 Tri\_Mode = Off  
 Dante\_Loop = 500  
 Dante\_Presat = FALSE  
 Decimation\_Rate = 0  
 Experiment\_Path = C:\Program Files\JEOL  
 Initial\_Wait = 1[s]  
 Phase = {0, 90, 270, 180, 180  
 Presat\_Time = 5[s]

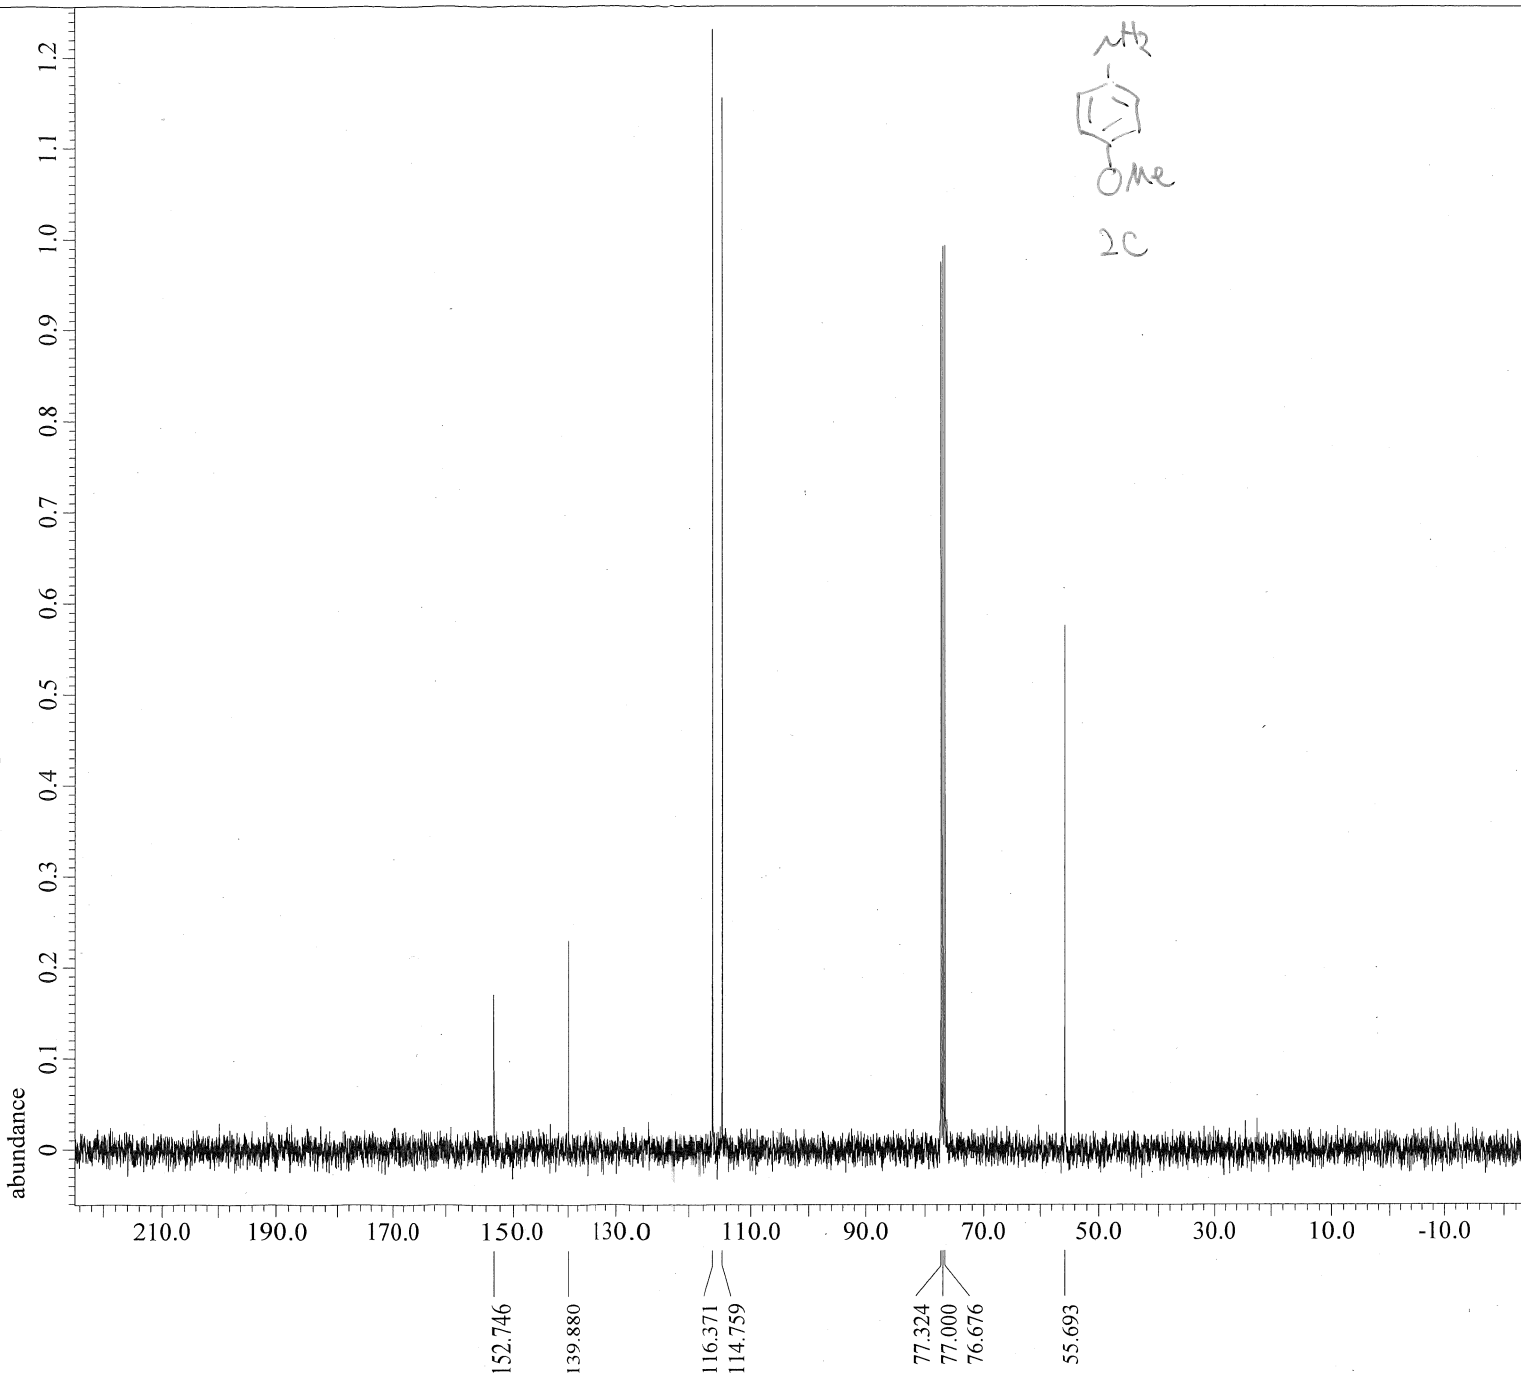

X : parts per Million :  $^{13}C$

----- PROCESSING PARAMETERS -----  
dc\_balance( 0, FALSE )  
sexp( 2.0[Hz], 0.0[s] )  
trapezoid3( 0[%], 80[%], 100[%] )  
zerofill( 1 )  
fft( 1, TRUE, TRUE )  
machinephase  
ppm

Derived from: ASH-113-13C-1.jdf

Filename = ASH-113-13C-2.jdf  
Author = element  
Experiment = single\_pulse\_dec  
Sample\_Id = 1  
Solvent = CHLOROFORM-D  
Actual\_Start\_Time = 29-JUL-2024 18:23:32  
Revision\_Time = 29-JUL-2024 12:27:23  
  
Comment = single pulse decoupled ga  
Data\_Format = 1D COMPLEX  
Dim\_Size = 26214  
X\_Domain = 13C  
Dim\_Title = 13C  
Dim\_Units = [ppm]  
Dimensions = X  
Site = ECS 400  
Spectrometer = JNM-ECS400  
  
Field\_Strength = 9.20197068[T] (390[MHz])  
X\_Acq\_Duration = 1.06430464[s]  
X\_Domain = 13C  
X\_Freq = 98.51479726[MHz]  
X\_Offset = 100[ppm]  
X\_Points = 32768  
X\_Prescans = 4  
X\_Resolution = 0.93958061[Hz]  
X\_Sweep = 30.78817734[kHz]  
Irr\_Domain = 1H  
Irr\_Freq = 391.78655441[MHz]  
Irr\_Offset = 5[ppm]  
Clipped = TRUE  
Scans = 57  
Total\_Scans = 57  
  
Relaxation\_Delay = 2[s]  
Recvr\_Gain = 60  
Temp\_Get = 22.2[dC]  
X\_90\_Width = 9.46[us]  
X\_Acq\_Time = 1.06430464[s]  
X\_Angle = 30[deg]  
X\_Atn = 4.9[dB]  
X\_Pulse = 3.15333333[us]  
Irr\_Atn\_Dec = 22.45[dB]  
Irr\_Atn\_Noe = 22.45[dB]  
Irr\_Noise = WALTZ  
Decoupling = TRUE  
Initial\_Wait = 1[s]  
Noe = TRUE  
Noe\_Time = 2[s]  
Repetition\_Time = 3.06430464[s]

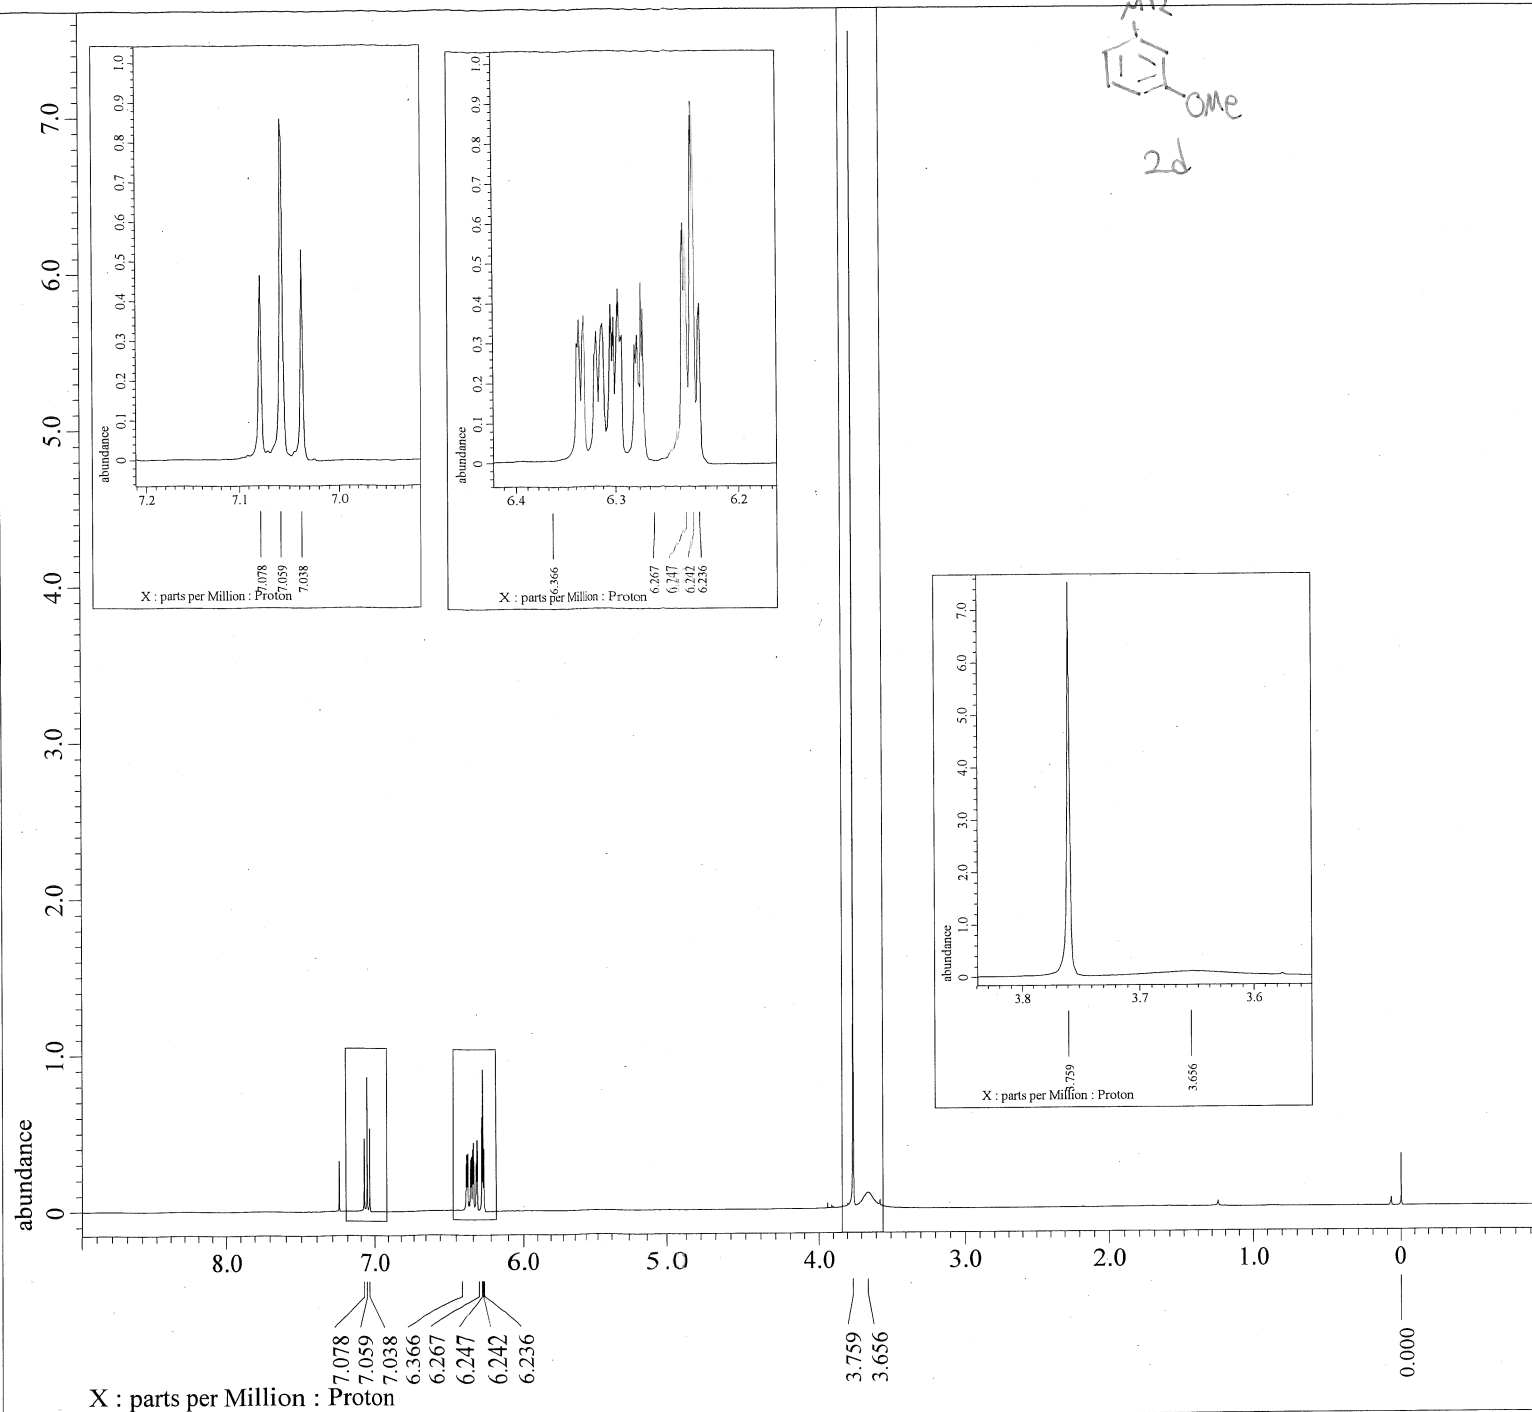

----- PROCESSING PARAMETERS -----  
 sexp( 0.2[Hz], 0.0[s] )  
 trapezoid( 0[%], 0[%], 80[%], 100[%] )  
 zerofill( 1 )  
 fft( 1, TRUE, TRUE )  
 machinephase  
 ppm

Derived from: ASH-111-pure3\_Proton-1-1.jdf

|                   |                          |
|-------------------|--------------------------|
| Filename          | = ASH-111-pure3_Proton-  |
| Author            | = element                |
| Experiment        | = proton_auto.jxp        |
| Sample_Id         | = ASH-105-pure3          |
| Solvent           | = CHLOROFORM-D           |
| Actual_Start_Time | = 27-JUL-2024 14:54:47   |
| Revision_Time     | = 12-NOV-2024 09:34:37   |
| Comment           | = single_pulse           |
| Data_Format       | = 1D COMPLEX             |
| Dim_Size          | = 13107                  |
| X_Domain          | = Proton                 |
| Dim_Title         | = Proton                 |
| Dim_Units         | = [ppm]                  |
| Dimensions        | = X                      |
| Spectrometer      | = DELTA2_NMR             |
| Field_Strength    | = 9.2982153[T] (400[MHz] |
| X_Acq_Duration    | = 2.20725248[s]          |
| X_Domain          | = Proton                 |
| X_Freq            | = 395.88430144[MHz]      |
| X_Offset          | = 5[ppm]                 |
| X_Points          | = 16384                  |
| X_Prescans        | = 1                      |
| X_Resolution      | = 0.45305193[Hz]         |
| X_Sweep           | = 7.42280285[kHz]        |
| X_Sweep_Clippped  | = 5.93824228[kHz]        |
| Irr_Domain        | = Proton                 |
| Irr_Freq          | = 395.88430144[MHz]      |
| Irr_Offset        | = 5[ppm]                 |
| Tri_Domain        | = Proton                 |
| Tri_Freq          | = 395.88430144[MHz]      |
| Tri_Offset        | = 5[ppm]                 |
| Blanking          | = 2[us]                  |
| Clipped           | = FALSE                  |
| Scans             | = 8                      |
| Total_Scans       | = 8                      |
| Relaxation_Delay  | = 5[s]                   |
| Recvr_Gain        | = 46                     |
| Temp_Get          | = 21.5[dC]               |
| X_90_Width        | = 6.34[us]               |
| X_Acq_Time        | = 2.20725248[s]          |
| X_Angle           | = 45[deg]                |
| X_Atn             | = 5[dB]                  |
| X_Pulse           | = 3.17[us]               |
| Irr_Mode          | = Off                    |
| Tri_Mode          | = Off                    |
| Dante_Loop        | = 500                    |
| Dante_Presat      | = FALSE                  |
| Decimation_Rate   | = 0                      |
| Experiment_Path   | = C:\Program Files\JEOL  |
| Initial_Wait      | = 1[s]                   |
| Phase             | = {0, 90, 270, 180, 180  |
| Presat_Time       | = 5[s]                   |

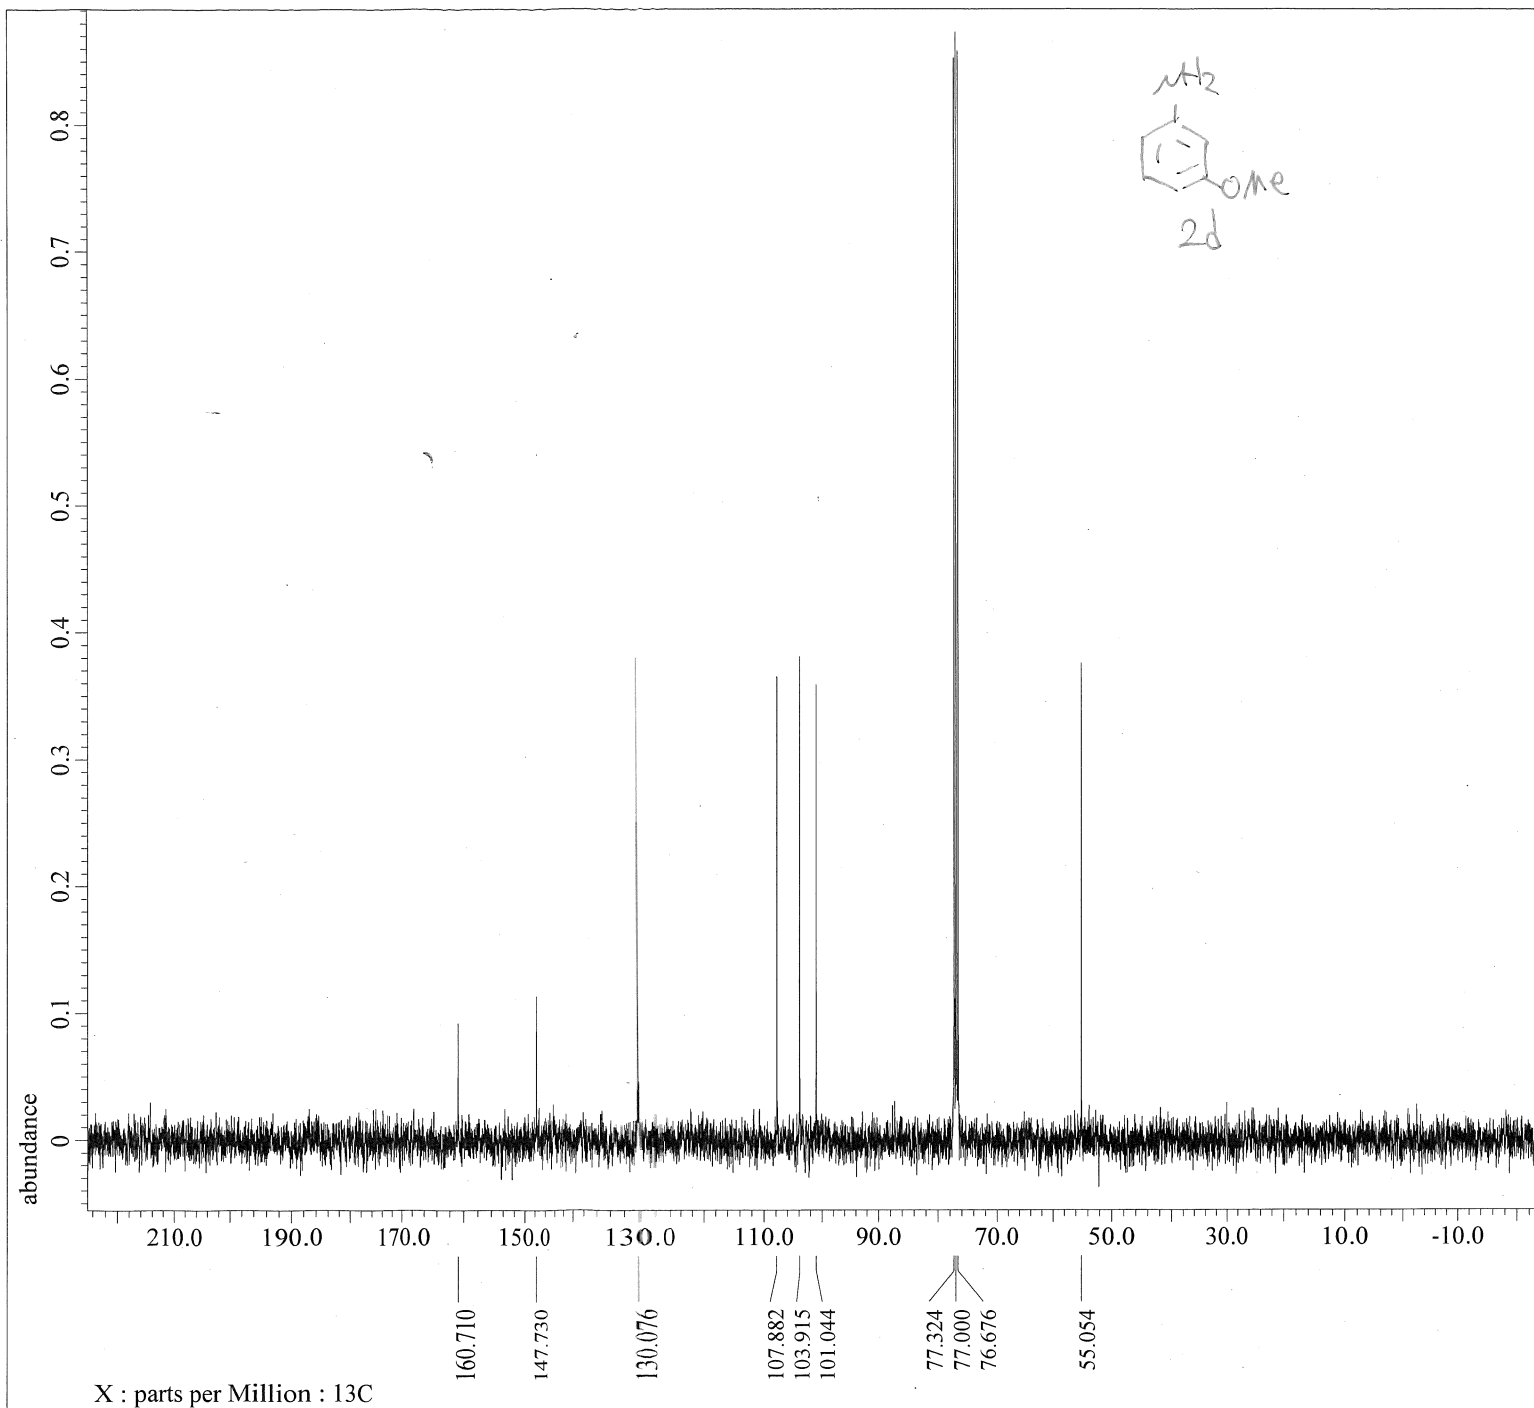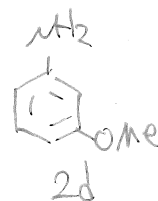

----- PROCESSING PARAMETERS -----  
 dc\_balance( 0, FALSE )  
 sexp( 2.0[Hz], 0.0[s] )  
 trapezoid3( 0[%], 80[%], 100[%] )  
 zerofill( 1 )  
 fft( 1, TRUE, TRUE )  
 machinephase  
 ppm

Derived from: ASH-111-13C-1.jdf

Filename = ASH-111-13C-2.jdf  
 Author = element  
 Experiment = single\_pulse\_dec  
 Sample\_Id = 1  
 Solvent = CHLOROFORM-D  
 Actual\_Start\_Time = 27-JUL-2024 21:45:20  
 Revision\_Time = 27-JUL-2024 15:45:50

Comment = single pulse decoupled ga  
 Data\_Format = 1D COMPLEX  
 Dim\_Size = 26214  
 X\_Domain = 13C  
 Dim\_Title = 13C  
 Dim\_Units = [ppm]  
 Dimensions = X  
 Site = ECS 400  
 Spectrometer = JNM-ECS400

Field\_Strength = 9.20197068[T] (390[MHz])  
 X\_Acq\_Duration = 1.06430464[s]  
 X\_Domain = 13C  
 X\_Freq = 98.51479726[MHz]  
 X\_Offset = 100[ppm]  
 X\_Points = 32768  
 X\_Prescans = 4  
 X\_Resolution = 0.93958061[Hz]  
 X\_Sweep = 30.78817734[kHz]  
 Irr\_Domain = 1H  
 Irr\_Freq = 391.78655441[MHz]  
 Irr\_Offset = 5[ppm]  
 Clipped = FALSE  
 Scans = 61  
 Total\_Scans = 61

Relaxation\_Delay = 2[s]  
 Recvr\_Gain = 60  
 Temp\_Get = 22.7[dC]  
 X\_90\_Width = 9.46[us]  
 X\_Acq\_Time = 1.06430464[s]  
 X\_Angle = 30[deg]  
 X\_Atn = 4.9[dB]  
 X\_Pulse = 3.15333333[us]  
 Irr\_Atn\_Dec = 22.45[dB]  
 Irr\_Atn\_Noe = 22.45[dB]  
 Irr\_Noise = WALTZ  
 Decoupling = TRUE  
 Initial\_Wait = 1[s]  
 Noe = TRUE  
 Noe\_Time = 2[s]  
 Repetition\_Time = 3.06430464[s]

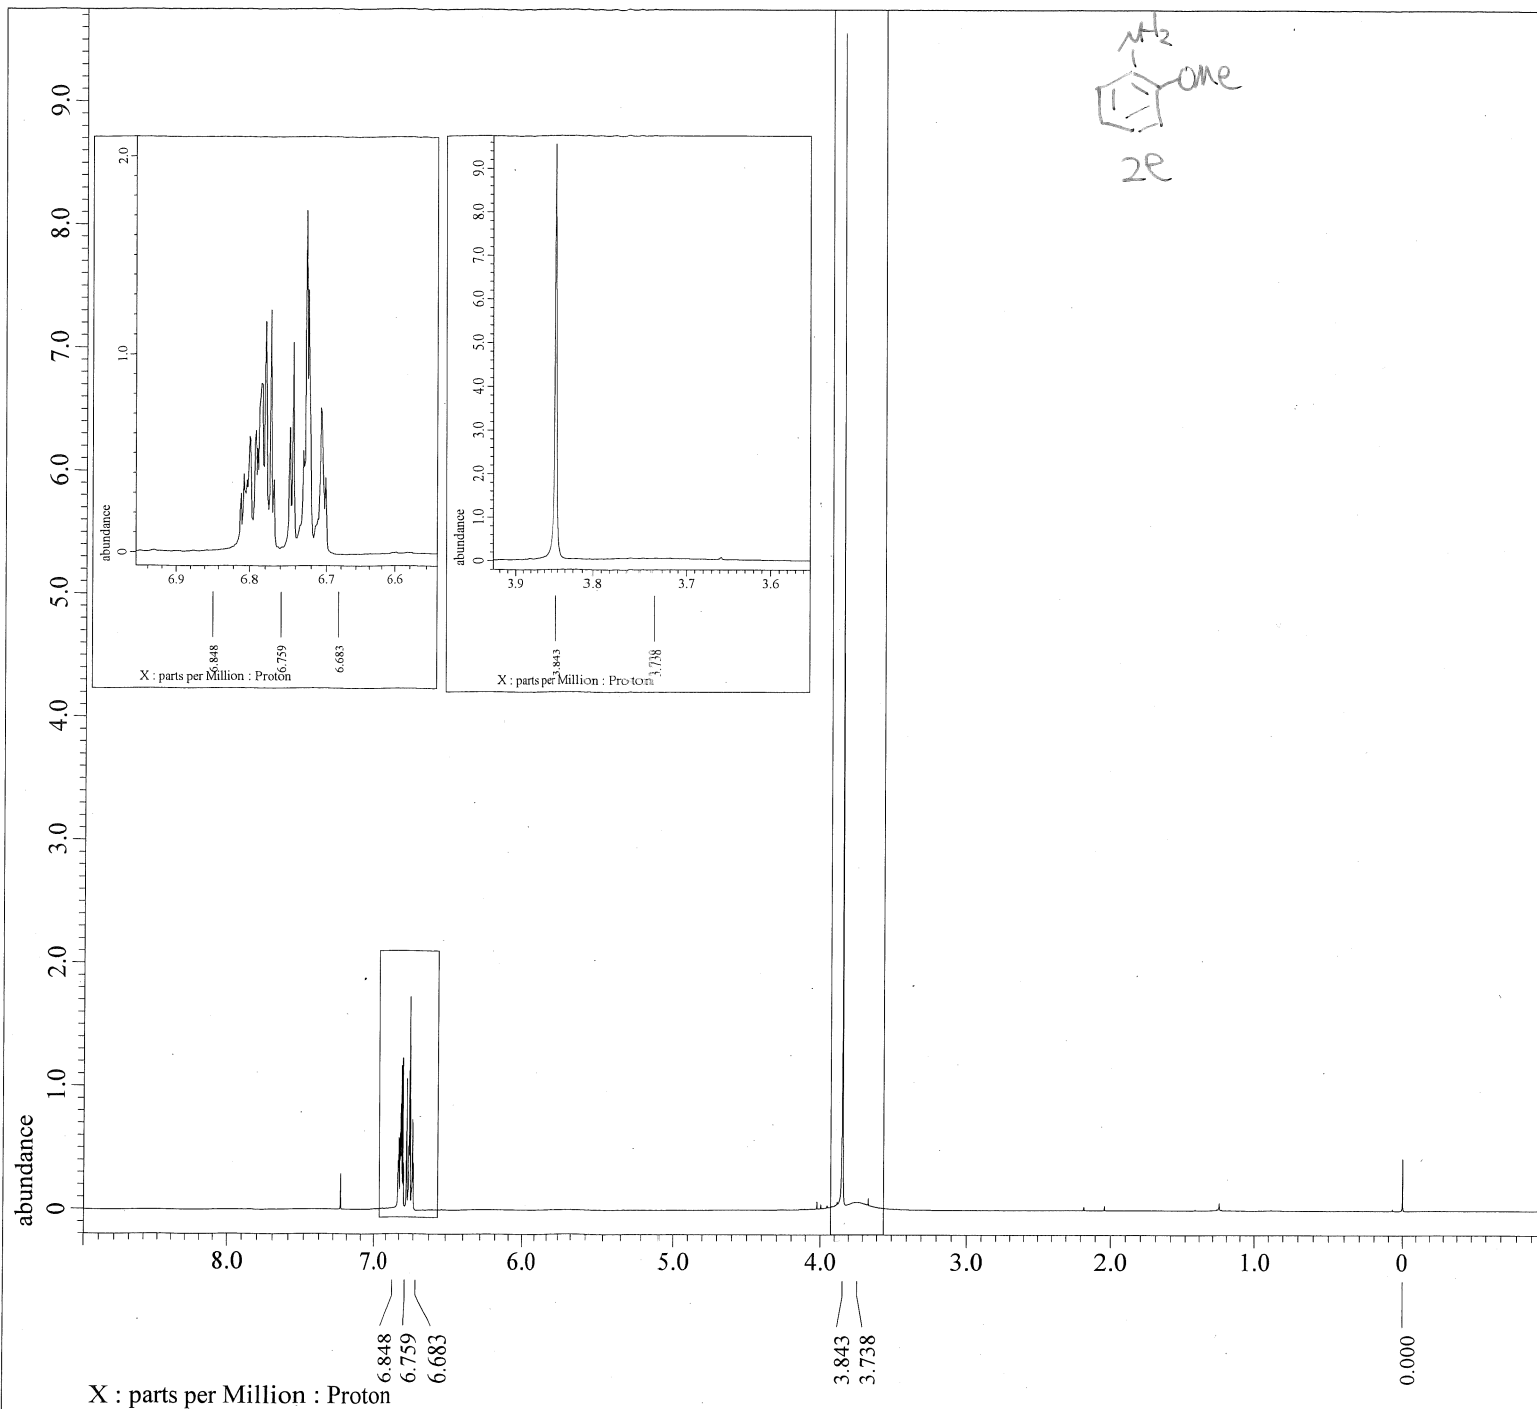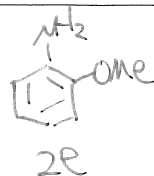

---- PROCESSING PARAMETERS ----  
 sexp( 0.2[Hz], 0.0[s] )  
 trapezoid( 0[%], 0[%], 80[%], 100[%] )  
 zerofill( 1 )  
 fft( 1, TRUE, TRUE )  
 machinephase  
 ppm

Derived from: ASH-110-pure2\_Proton-1-1.jdf

Filename = ASH-110-pure2\_Proton-  
 Author = element  
 Experiment = proton\_auto.jxp  
 Sample\_Id = ASH-110-pure2  
 Solvent = CHLOROFORM-D  
 Actual\_Start\_Time = 23-JUL-2024 12:52:52  
 Revision\_Time = 12-NOV-2024 09:37:51

Comment = single\_pulse  
 Data\_Format = 1D COMPLEX  
 Dim\_Size = 13107  
 X\_Domain = Proton  
 Dim\_Title = Proton  
 Dim\_Units = [ppm]  
 Dimensions = X  
 Spectrometer = DELTA2\_NMR

Field\_Strength = 9.2982153[T] (400[MHz]  
 X\_Acq\_Duration = 2.20725248[s]  
 X\_Domain = Proton  
 X\_Freq = 395.88430144[MHz]  
 X\_Offset = 5[ppm]  
 X\_Points = 16384  
 X\_Prescans = 1  
 X\_Resolution = 0.45305193[Hz]  
 X\_Sweep = 7.42280285[kHz]  
 X\_Sweep\_Clipped = 5.93824228[kHz]  
 Irr\_Domain = Proton  
 Irr\_Freq = 395.88430144[MHz]  
 Irr\_Offset = 5[ppm]  
 Tri\_Domain = Proton  
 Tri\_Freq = 395.88430144[MHz]  
 Tri\_Offset = 5[ppm]  
 Blanking = 2[us]  
 Clipped = FALSE  
 Scans = 8  
 Total\_Scans = 8

Relaxation\_Delay = 5[s]  
 Recvr\_Gain = 46  
 Temp\_Get = 22.3[dC]  
 X\_90\_Width = 6.34[us]  
 X\_Acq\_Time = 2.20725248[s]  
 X\_Angle = 45[deg]  
 X\_Atn = 5[dB]  
 X\_Pulse = 3.17[us]  
 Irr\_Mode = Off  
 Tri\_Mode = Off  
 Dante\_Loop = 500  
 Dante\_Presat = FALSE  
 Decimation\_Rate = 0  
 Experiment\_Path = C:\Program Files\JEOL  
 Initial\_Wait = 1[s]  
 Phase = {0, 90, 270, 180, 180  
 Presat\_Time = 5[s]

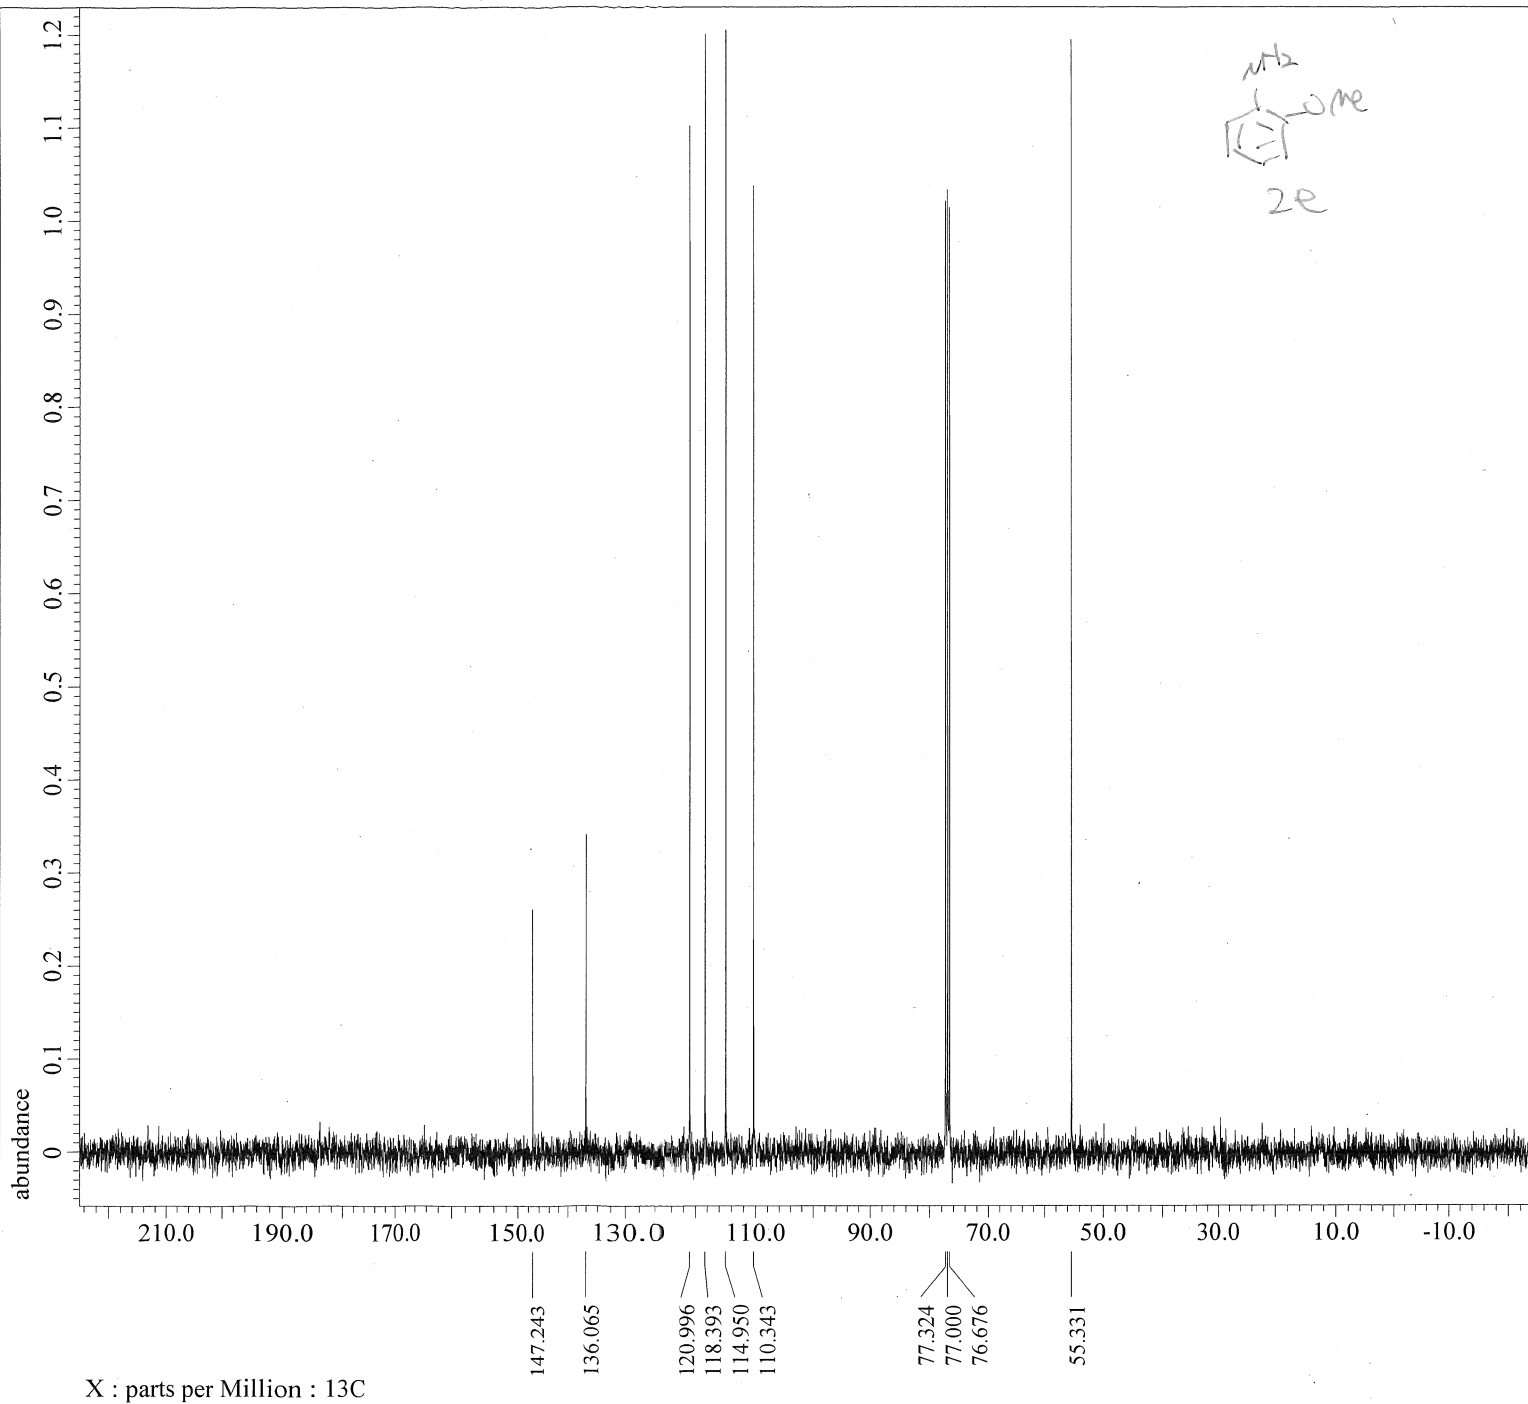

---- PROCESSING PARAMETERS ----  
dc\_balance( 0, FALSE )  
sexp( 2.0[Hz], 0.0[s] )  
trapezoid3( 0[%], 80[%], 100[%] )  
zerofill( 1 )  
fft( 1, TRUE, TRUE )  
machinephase  
ppm

Derived from: ASH-110-13C-1.jdf

Filename = ASH-110-13C-2.jdf  
Author = element  
Experiment = single\_pulse\_dec  
Sample\_Id = 1  
Solvent = CHLOROFORM-D  
Actual\_Start\_Time = 29-JUL-2024 18:11:22  
Revision\_Time = 29-JUL-2024 12:26:21  
  
Comment = single pulse decoupled ga  
Data Format = 1D COMPLEX  
Dim\_Size = 26214  
X\_Domain = 13C  
Dim\_Title = 13C  
Dim\_Units = [ppm]  
Dimensions = X  
Site = ECS 400  
Spectrometer = JNM-ECS400  
  
Field\_Strength = 9.20197068[T] (390[MHz])  
X\_Acq\_Duration = 1.06430464[s]  
X\_Domain = 13C  
X\_Freq = 98.51479726[MHz]  
X\_Offset = 100[ppm]  
X\_Points = 32768  
X\_Prescans = 4  
X\_Resolution = 0.93958061[Hz]  
X\_Sweep = 30.78817734[kHz]  
Irr\_Domain = 1H  
Irr\_Freq = 391.78655441[MHz]  
Irr\_Offset = 5[ppm]  
Clipped = FALSE  
Scans = 53  
Total\_Scans = 53  
  
Relaxation\_Delay = 2[s]  
Recvr\_Gain = 60  
Temp\_Get = 22.1[dC]  
X\_90\_Width = 9.46[us]  
X\_Acq\_Time = 1.06430464[s]  
X\_Angle = 30[deg]  
X\_Atn = 4.9[dB]  
X\_Pulse = 3.15333333[us]  
Irr\_Atn\_Dec = 22.45[dB]  
Irr\_Atn\_No = 22.45[dB]  
Irr\_Noise = WALTZ  
Decoupling = TRUE  
Initial\_Wait = 1[s]  
Noe = TRUE  
Noe\_Time = 2[s]  
Repetition\_Time = 3.06430464[s]

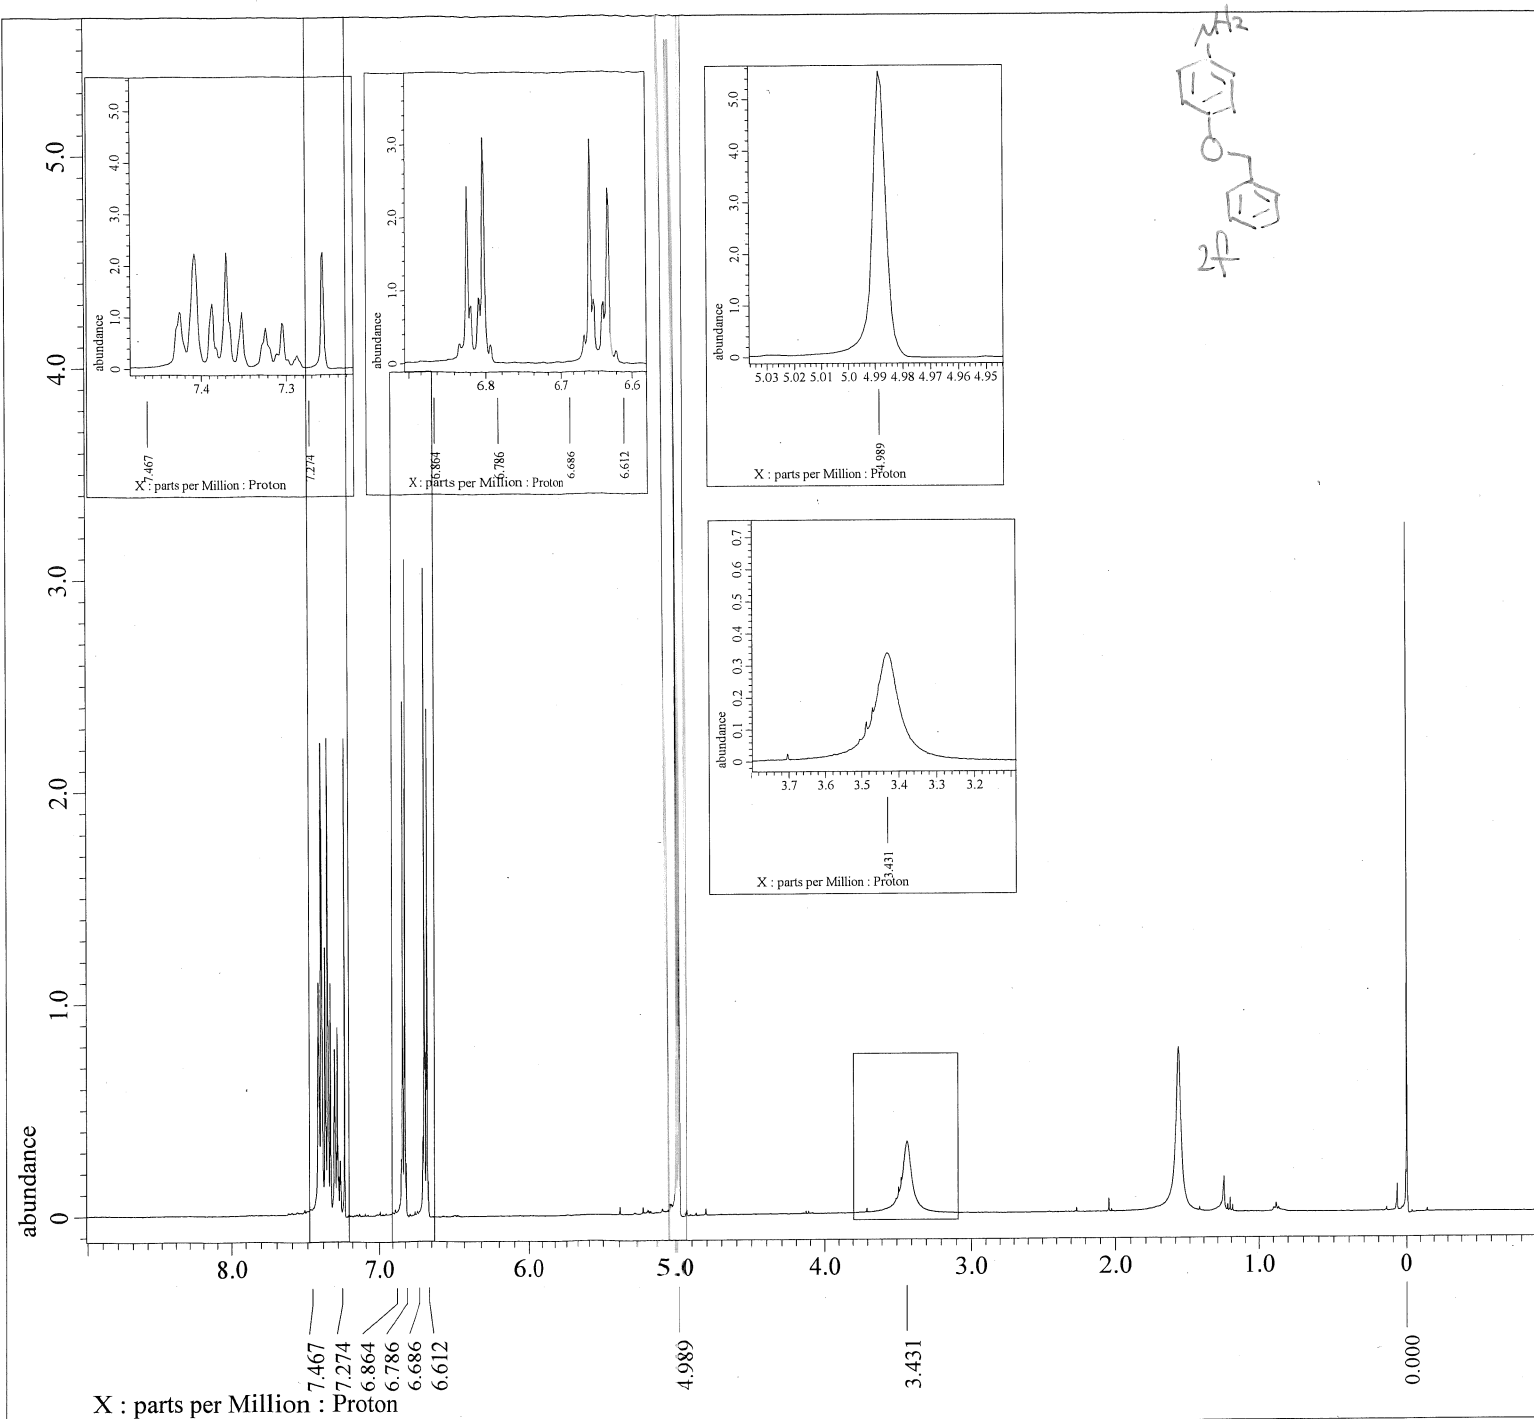

----- PROCESSING PARAMETERS -----  
 dc balance( 0, FALSE )  
 sexp( 0.2[Hz], 0.0[s] )  
 trapezoid( 0[%], 0[%], 80[%], 100[%] )  
 zerofill( 1 )  
 fft( 1, TRUE, TRUE )  
 machinephase  
 ppm

Derived from: ASH-120-pure4\_Proton-1-1.jdf

Filename = ASH-120-pure4\_Proton-1-2.  
 Author = element  
 Experiment = proton.jxp  
 Sample\_Id = ASH-120-pure4  
 Solvent = CHLOROFORM-D  
 Actual\_Start\_Time = 1-AUG-2024 16:18:53  
 Revision\_Time = 12-NOV-2024 09:42:12

Comment = single\_pulse  
 Data\_Format = 1D\_COMPLEX  
 Dim\_Size = 13107  
 X\_Domain = Proton  
 Dim\_Title = Proton  
 Dim\_Units = [ppm]  
 Dimensions = X  
 Spectrometer = DELTA2\_NMR

Field Strength = 9.4073814[T] (400[MHz])  
 X\_Acq\_Duration = 2.18103808[s]  
 X\_Domain = 1H  
 X\_Freq = 400.53219825[MHz]  
 X\_Offset = 5[ppm]  
 X\_Points = 16384  
 X\_Prescans = 1  
 X\_Resolution = 0.45849727[Hz]  
 X\_Sweep = 7.51201923[kHz]  
 X\_Sweep\_Clipped = 6.00961538[kHz]  
 Irr\_Domain = Proton  
 Irr\_Freq = 400.53219825[MHz]  
 Irr\_Offset = 5[ppm]  
 Tri\_Domain = Proton  
 Tri\_Freq = 400.53219825[MHz]  
 Tri\_Offset = 5[ppm]  
 Clipped = FALSE  
 Scans = 8  
 Total\_Scans = 8

Relaxation\_Delay = 5[s]  
 Recvr\_Gain = 44  
 Temp\_Get = 21.4[dC]  
 X\_90\_Width = 6.7[us]  
 X\_Acq\_Time = 2.18103808[s]  
 X\_Angle = 45[deg]  
 X\_Atn = 0.8[dB]  
 X\_Pulse = 3.35[us]  
 Irr\_Mode = Off  
 Tri\_Mode = Off  
 Dante\_Presat = FALSE  
 Initial\_Wait = 1[s]  
 Repetition\_Time = 7.18103808[s]

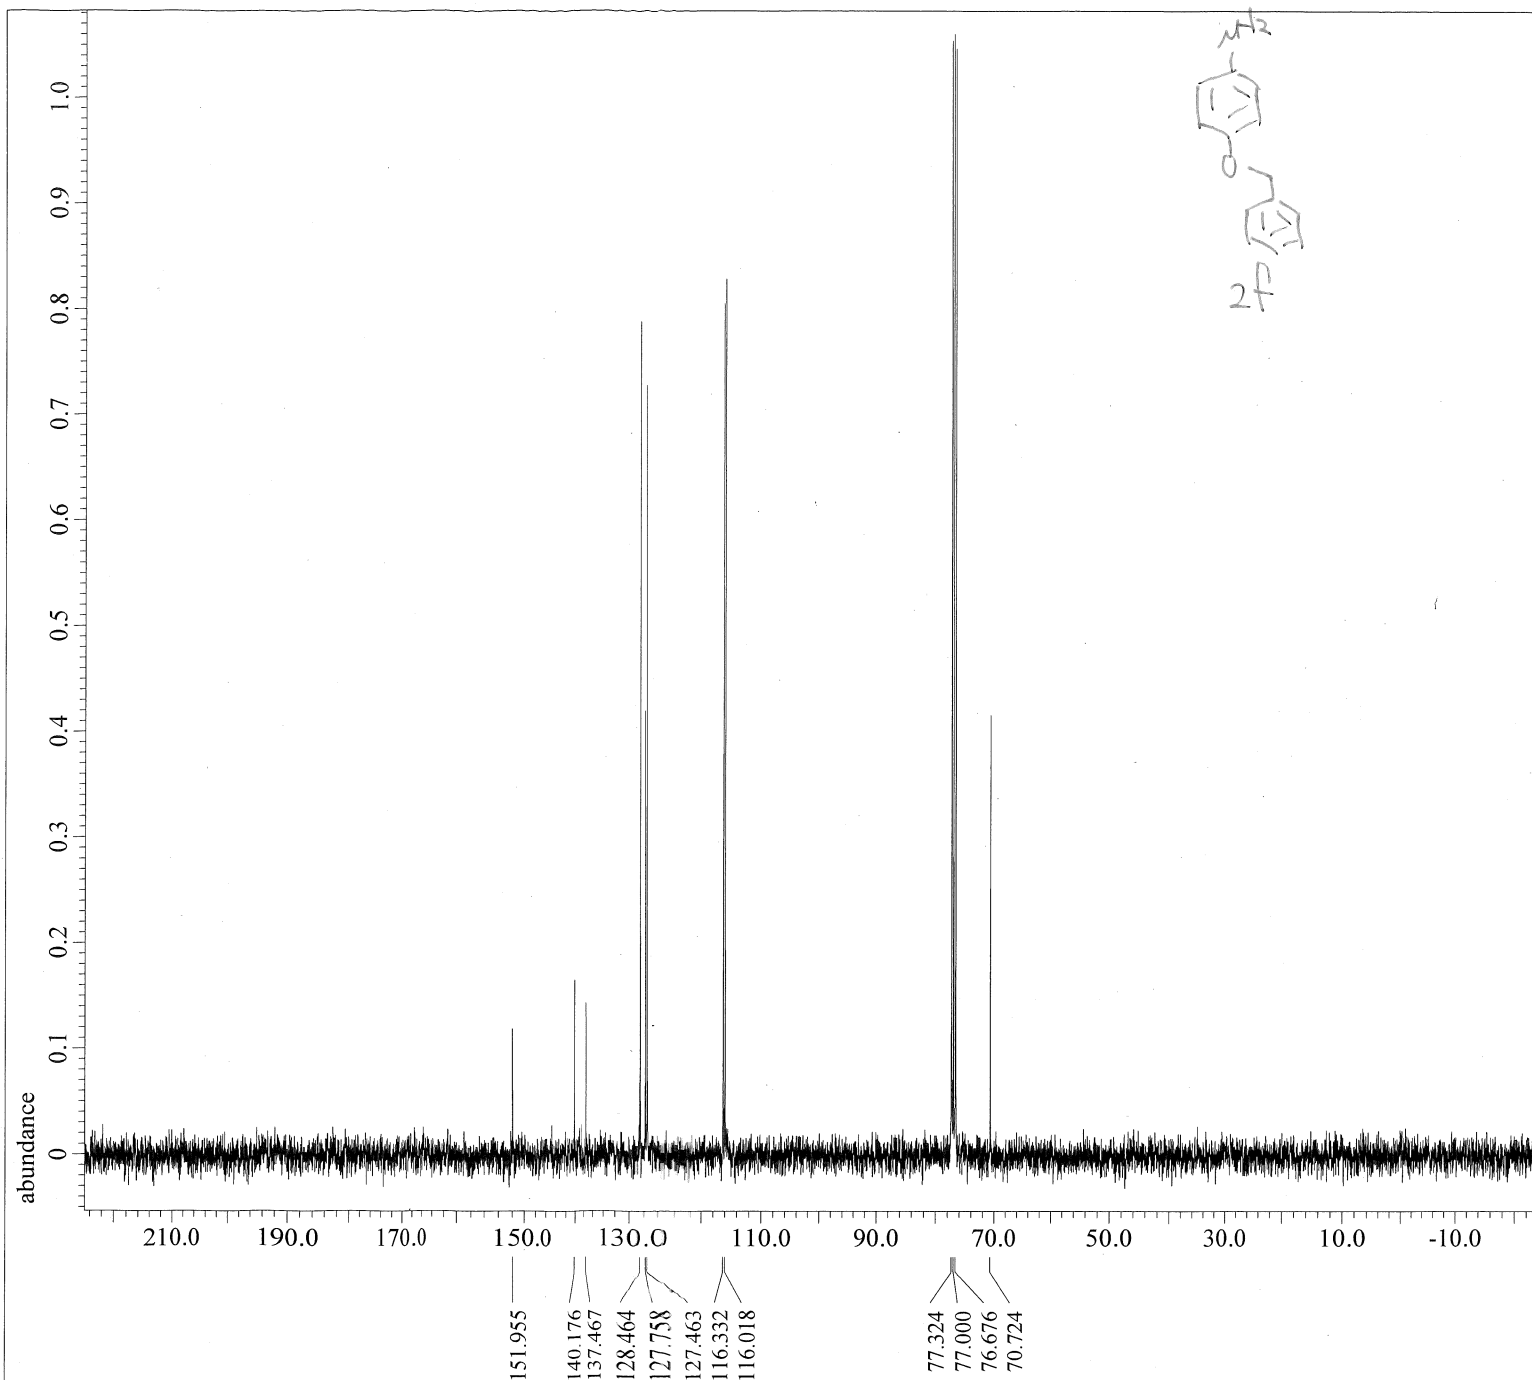

----- PROCESSING PARAMETERS -----  
dc\_balance( 0, FALSE )  
sext( 2.0[Hz], 0.0[s] )  
trapezoid3( 0[%], 80[%], 100[%] )  
zerofill( 1 )  
fft( 1, TRUE, TRUE )  
machinephase  
ppm

Derived from: ASH-120-13C-1.jdf

Filename = ASH-120-13C-2.jdf  
Author = element  
Experiment = single\_pulse\_dec  
Sample\_Id = 1  
Solvent = CHLOROFORM-D  
Actual\_Start\_Time = 1-AUG-2024 22:56:48  
Revision\_Time = 1-AUG-2024 16:52:36  
  
Comment = single pulse decoupled ga  
Data Format = 1D COMPLEX  
Dim\_Size = 26214  
X\_Domain = 13C  
Dim Title = 13C  
Dim Units = [ppm]  
Dimensions = X  
Site = ECS 400  
Spectrometer = JNM-ECS400  
  
Field Strength = 9.20197068[T] (390[MHz])  
X\_Acq\_Duration = 1.06430464[s]  
X\_Domain = 13C  
X\_Freq = 98.51479726[MHz]  
X\_Offset = 100[ppm]  
X\_Points = 32768  
X\_Prescans = 4  
X\_Resolution = 0.93958061[Hz]  
X\_Sweep = 30.78817734[kHz]  
Irr\_Domain = 1H  
Irr\_Freq = 391.78655441[MHz]  
Irr\_Offset = 5[ppm]  
Clipped = FALSE  
Scans = 56  
Total\_Scans = 56  
  
Relaxation\_Delay = 2[s]  
Recvr\_Gain = 60  
Temp\_Get = 22.5[dC]  
X\_90\_Width = 9.46[us]  
X\_Acq\_Time = 1.06430464[s]  
X\_Angle = 30[deg]  
X\_Atn = 4.9[dB]  
X\_Pulse = 3.15333333[us]  
Irr\_Atn\_Dec = 22.45[dB]  
Irr\_Atn\_No = 22.45[dB]  
Irr\_Noise = WALTZ  
Decoupling = TRUE  
Initial\_Wait = 1[s]  
Noe = TRUE  
Noe Time = 2[s]  
Repetition\_Time = 3.06430464[s]

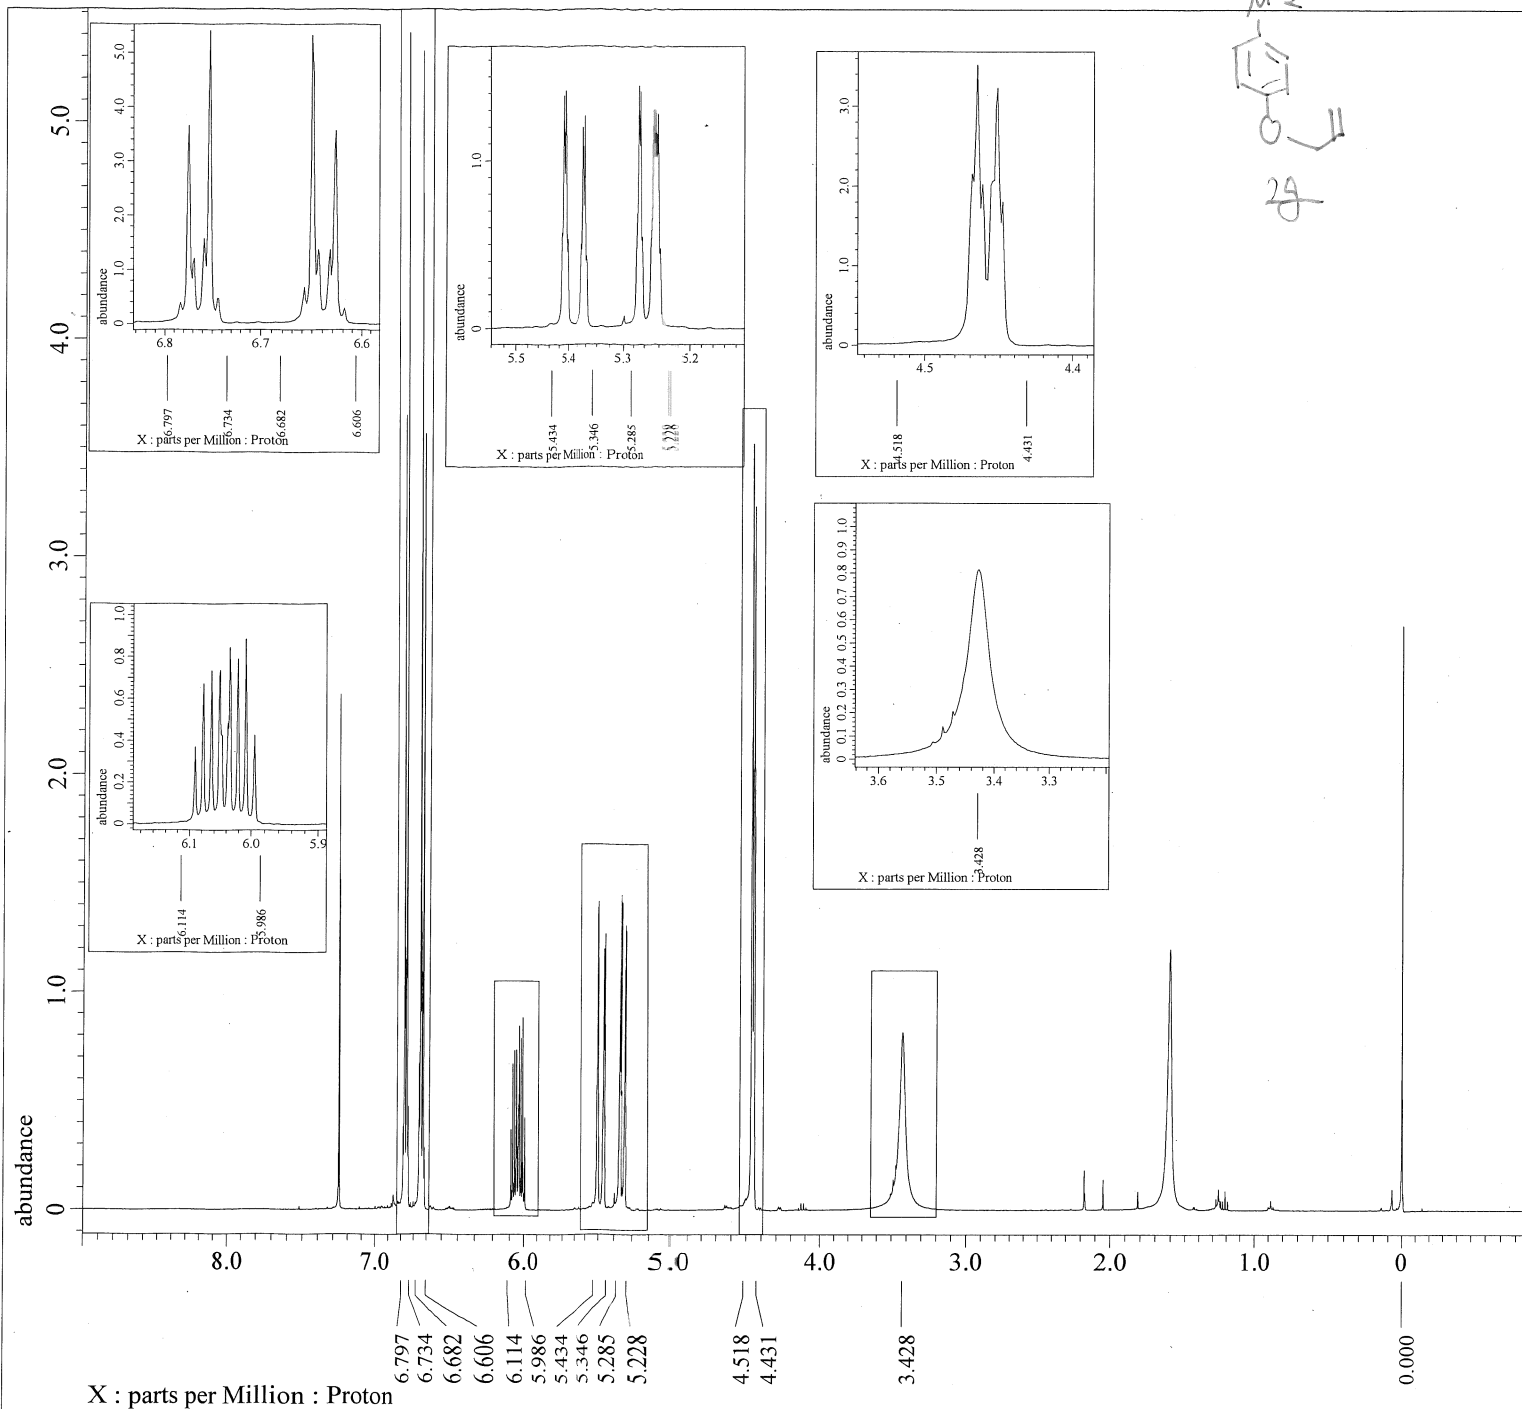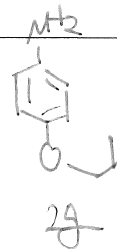

----- PROCESSING PARAMETERS -----

```

dc_balance( 0, FALSE )
sexp( 0.2[Hz], 0.0[s] )
trapezoid( 0[%], 0[%], 80[%], 100[%] )
zerofill( 1 )
fft( 1, TRUE, TRUE )
machinephase
ppm

```

Derived from: ASH-155-pure2\_Proton-1-1.jdf

```

Filename      = ASH-155-pure2_Proton-1-2.
Author       = element
Experiment    = proton.jxp
Sample_Id    = ASH-155-pure2
Solvent      = CHLOROFORM-D
Actual_Start_Time = 21-AUG-2024 09:37:03
Revision_Time  = 12-NOV-2024 09:49:52

Comment      = single_pulse
Data_Format  = 1D_COMPLEX
Dim_Size     = 13107
X_Domain     = Proton
Dim_Title    = Proton
Dim_Units    = [ppm]
Dimensions   = X
Spectrometer = DELTA2_NMR

Field_Strength = 9.4073814[T] (400[MHz])
X_Acq_Duration = 2.18103808[s]
X_Domain       = 1H
X_Freq         = 400.53219825[MHz]
X_Offset       = 5[ppm]
X_Points       = 16384
X_Prescans     = 1
X_Resolution   = 0.45849727[Hz]
X_Sweep        = 7.51201923[kHz]
X_Sweep_Clipped = 6.00961538[kHz]
Irr_Domain     = Proton
Irr_Freq       = 400.53219825[MHz]
Irr_Offset     = 5[ppm]
Tri_Domain     = Proton
Tri_Freq       = 400.53219825[MHz]
Tri_Offset     = 5[ppm]
Clipped        = FALSE
Scans          = 8
Total_Scans    = 8

Relaxation_Delay = 5[s]
Recvr_Gain       = 44
Temp_Get         = 20.4[dC]
X_90_Width       = 6.7[us]
X_Acq_Time       = 2.18103808[s]
X_Angle          = 45[deg]
X_Atn            = 0.8[dB]
X_Pulse          = 3.35[us]
Irr_Mode         = Off
Tri_Mode         = Off
Dante_Preset     = FALSE
Initial_Wait     = 1[s]
Repetition_Time  = 7.18103808[s]

```

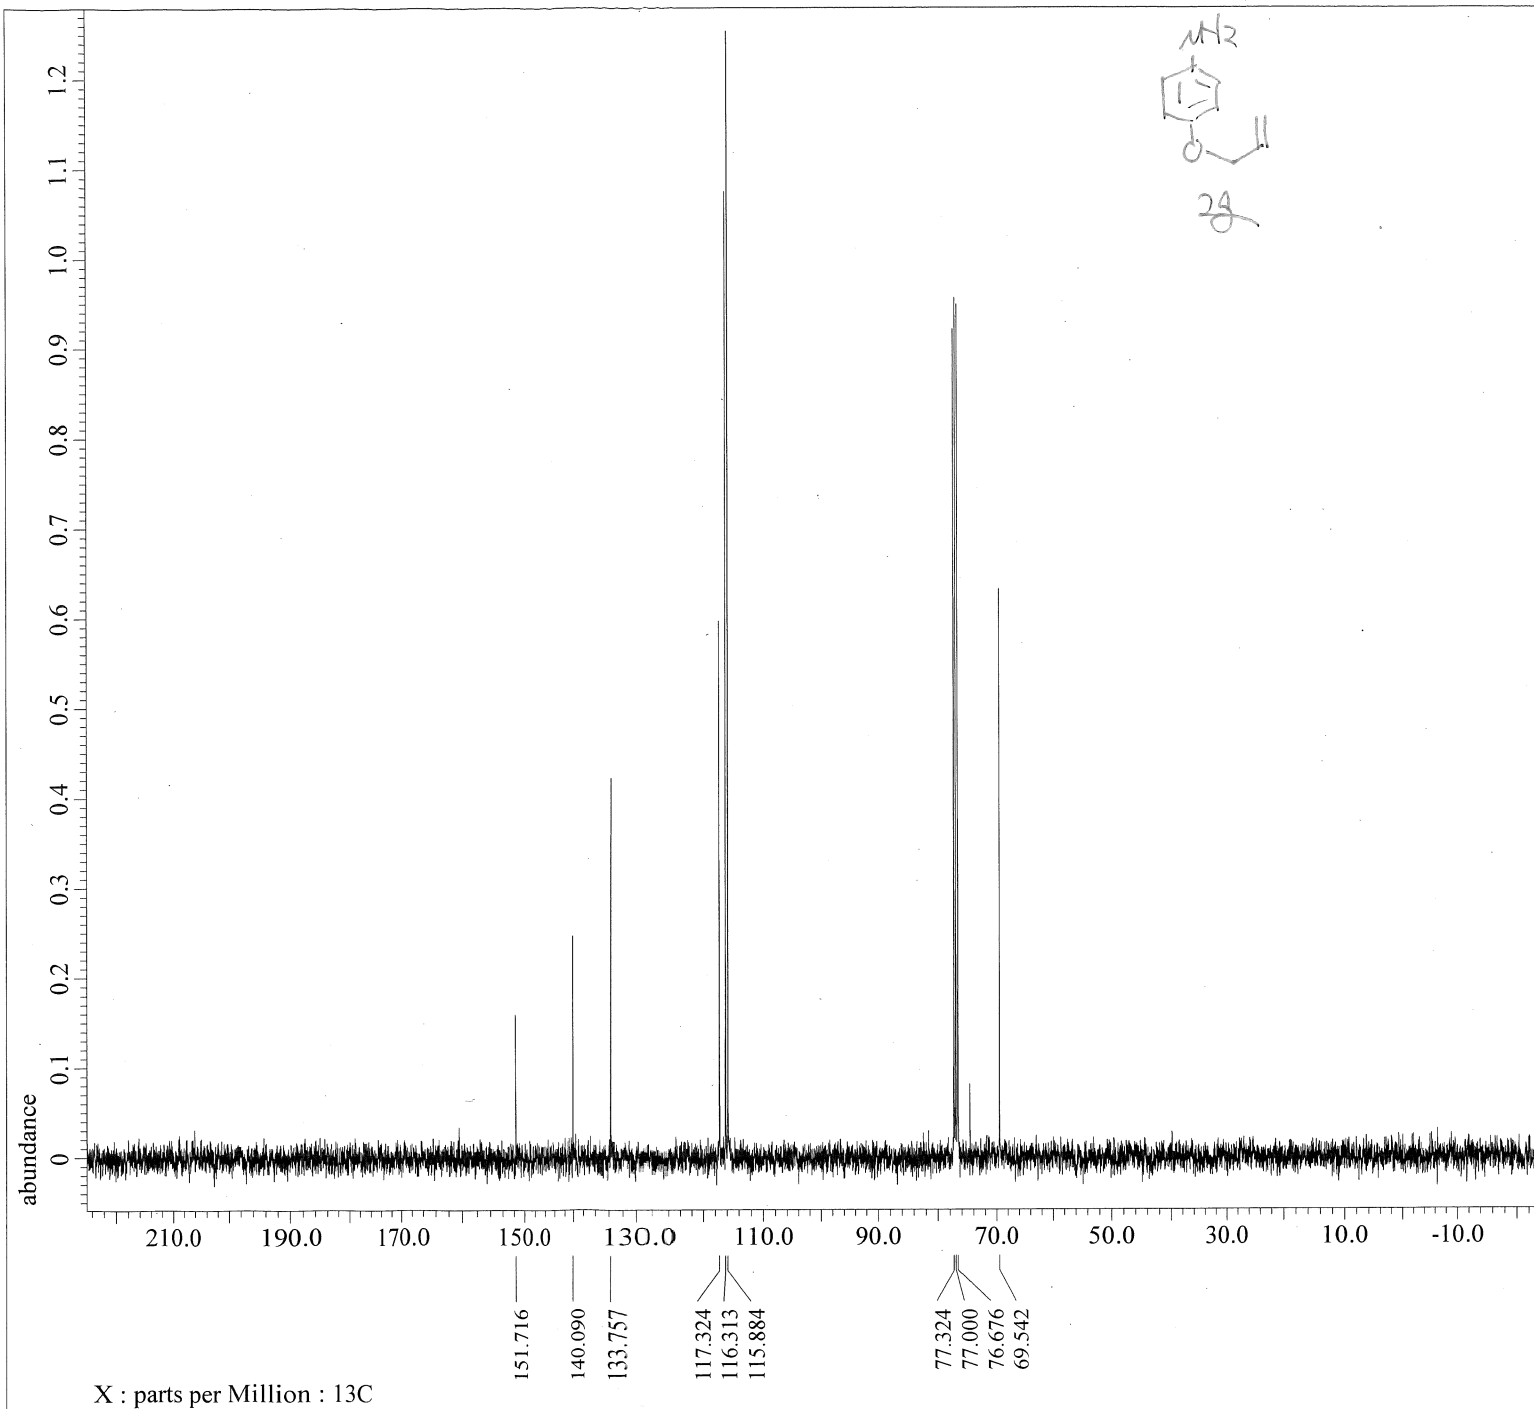

----- PROCESSING PARAMETERS -----  
dc\_balance( 0, FALSE )  
sexp( 2.0[Hz], 0.0[s] )  
trapezoid3( 0[%], 80[%], 100[%] )  
zerofill( 1 )  
fft( 1, TRUE, TRUE )  
machinephase  
ppm

Derived from: ASH-155-13C-1.jdf

Filename = ASH-155-13C-2.jdf  
Author = element  
Experiment = single\_pulse\_dec  
Sample\_Id = 1  
Solvent = CHLOROFORM-D  
Actual\_Start\_Time = 21-AUG-2024 16:14:31  
Revision\_Time = 21-AUG-2024 10:55:44

Comment = single pulse decoupled ga  
Data\_Format = 1D COMPLEX  
Dim\_Size = 26214  
X\_Domain = 13C  
Dim\_Title = 13C  
Dim\_Units = [ppm]  
Dimensions = X  
Site = ECS 400  
Spectrometer = JNM-ECS400

Field\_Strength = 9.20197068[T] (390[MHz])  
X\_Acq\_Duration = 1.06430464[s]  
X\_Domain = 13C  
X\_Freq = 98.51479726[MHz]  
X\_Offset = 100[ppm]  
X\_Points = 32768  
X\_Prescans = 4  
X\_Resolution = 0.93958061[Hz]  
X\_Sweep = 30.78817734[kHz]  
Irr\_Domain = 1H  
Irr\_Freq = 391.78655441[MHz]  
Irr\_Offset = 5[ppm]  
Clipped = FALSE  
Scans = 57  
Total\_Scans = 57

Relaxation\_Delay = 2[s]  
Recvr\_Gain = 60  
Temp\_Get = 21.8[dC]  
X\_90\_Width = 9.46[us]  
X\_Acq\_Time = 1.06430464[s]  
X\_Angle = 30[deg]  
X\_Atn = 4.9[dB]  
X\_Pulse = 3.15333333[us]  
Irr\_Atn\_Dec = 22.45[dB]  
Irr\_Atn\_Noe = 22.45[dB]  
Irr\_Noise = WALTZ  
Decoupling = TRUE  
Initial\_Wait = 1[s]  
Noe = TRUE  
Noe\_Time = 2[s]  
Repetition\_Time = 3.06430464[s]

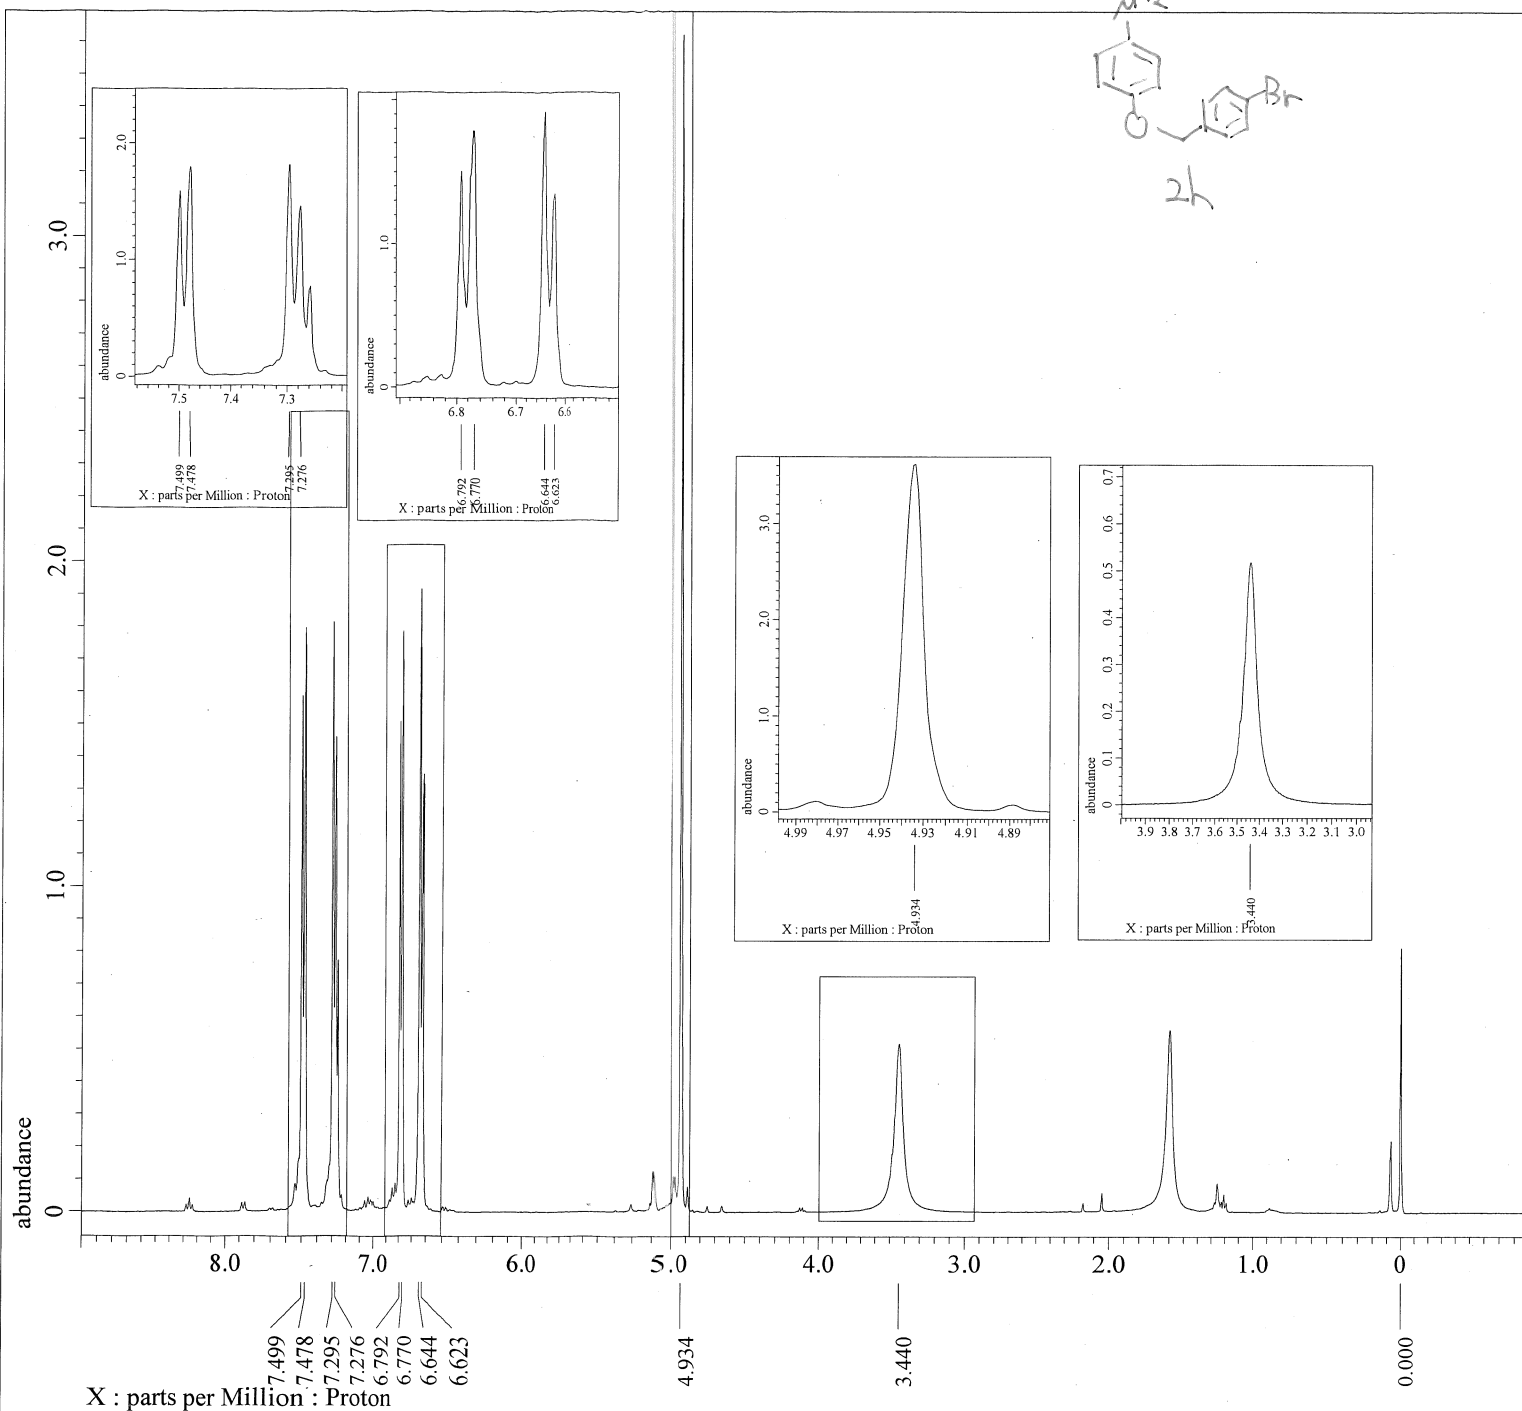

```

---- PROCESSING PARAMETERS ----
dc_balance( 0, FALSE )
sexf( 0.2[Hz], 0.0[s] )
trapezoid( 0[%], 0[%], 80[%], 100[%] )
zerofill( 1 )
fft( 1, TRUE, TRUE )
machinephase
ppm

```

Derived from: ASH-157-pure2\_Proton-1-1.jdf

```

Filename      = ASH-157-pure2_Proton-1-2.
Author       = element
Experiment   = proton.jxp
Sample_Id    = ASH-157-pure2
Solvent      = CHLOROFORM-D
Actual_Start_Time = 22-AUG-2024 11:08:32
Revision_Time   = 12-NOV-2024 09:55:02

```

```

Comment      = single_pulse
Data Format   = 1D COMPLEX
Dim_Size     = 13107
X_Domain     = Proton
Dim_Title    = Proton
Dim_Units    = [ppm]
Dimensions   = X
Spectrometer = DELTA2 NMR

```

```

Field_Strength = 9.4073814[T] (400[MHz])
X_Acq_Duration = 2.18103808[s]
X_Domain      = 1H
X_Freq       = 400.53219825[MHz]
X_Offset     = 5[ppm]
X_Points     = 16384
X_Prescans   = 1
X_Resolution = 0.45849727[Hz]
X_Sweep      = 7.51201923[kHz]
X_Sweep_Clippped = 6.00961538[kHz]
Irr_Domain   = Proton
Irr_Freq     = 400.53219825[MHz]
Irr_Offset   = 5[ppm]
Tri_Domain   = Proton
Tri_Freq     = 400.53219825[MHz]
Tri_Offset   = 5[ppm]
Clipped      = FALSE
Scans        = 8
Total_Scans  = 8

```

```

Relaxation_Delay = 5[s]
Recvr_Gain       = 42
Temp_Get         = 20.8[dC]
X_90_Width      = 6.7[us]
X_Acq_Time      = 2.18103808[s]
X_Angle         = 45[deg]
X_Atn           = 0.8[dB]
X_Pulse         = 3.35[us]
Irr_Mode        = Off
Tri_Mode        = Off
Dante_Presat    = FALSE
Initial_Wait    = 1[s]
Repetition_Time = 7.18103808[s]

```

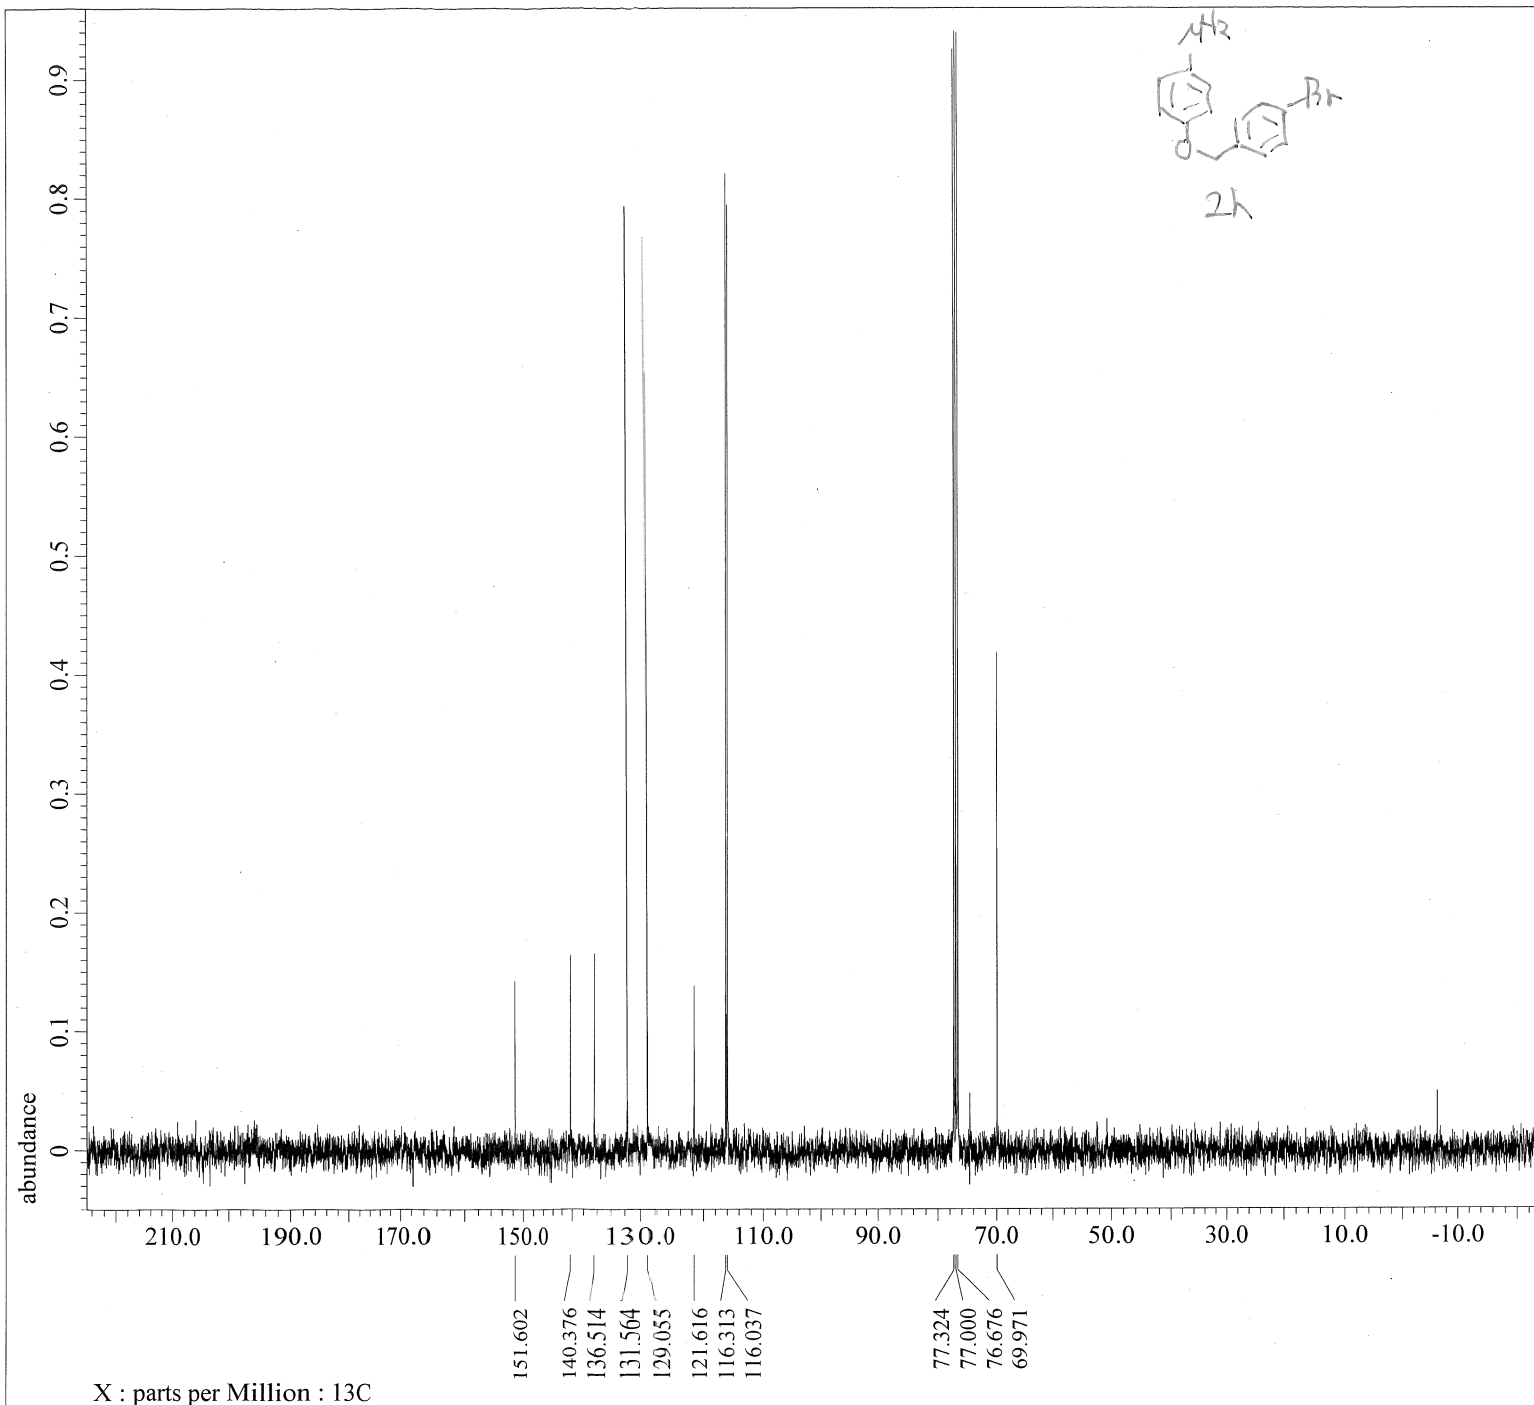

---- PROCESSING PARAMETERS ----  
 dc\_balance( 0, FALSE )  
 sexp( 2.0[Hz], 0.0[s] )  
 trapezoid3( 0[%], 80[%], 100[%] )  
 zerofill( 1 )  
 fft( 1, TRUE, TRUE )  
 machinephase  
 ppm

Derived from: ASH-157-13C-1.jdf

Filename = ASH-157-13C-2.jdf  
 Author = element  
 Experiment = single\_pulse\_dec  
 Sample\_Id = 1  
 Solvent = CHLOROFORM-D  
 Actual\_Start\_Time = 22-AUG-2024 17:02:47  
 Revision\_Time = 22-AUG-2024 11:04:17

Comment = single pulse decoupled ga  
 Data\_Format = 1D COMPLEX  
 Dim\_Size = 26214  
 X\_Domain = 13C  
 Dim\_Title = 13C  
 Dim\_Units = [ppm]  
 Dimensions = X  
 Site = ECS 400  
 Spectrometer = JNM-ECS400

Field Strength = 9.20197068[T] (390[MHz])  
 X\_Acq\_Duration = 1.06430464[s]  
 X\_Domain = 13C  
 X\_Freq = 98.51479726[MHz]  
 X\_Offset = 100[ppm]  
 X\_Points = 32768  
 X\_Prescans = 4  
 X\_Resolution = 0.93958061[Hz]  
 X\_Sweep = 30.78817734[kHz]  
 Irr\_Domain = 1H  
 Irr\_Freq = 391.78655441[MHz]  
 Irr\_Offset = 5[ppm]  
 Clipped = FALSE  
 Scans = 72  
 Total\_Scans = 72

Relaxation\_Delay = 2[s]  
 Recvr\_Gain = 60  
 Temp\_Get = 21.9[dC]  
 X\_90\_Width = 9.46[us]  
 X\_Acq\_Time = 1.06430464[s]  
 X\_Angle = 30[deg]  
 X\_Atn = 4.9[dB]  
 X\_Pulse = 3.15333333[us]  
 Irr\_Atn\_Dec = 22.45[dB]  
 Irr\_Atn\_Noise = 22.45[dB]  
 Irr\_Noise = WALTZ  
 Decoupling = TRUE  
 Initial\_Wait = 1[s]  
 Noe = TRUE  
 Noe\_Time = 2[s]  
 Repetition\_Time = 3.06430464[s]

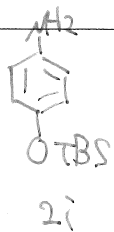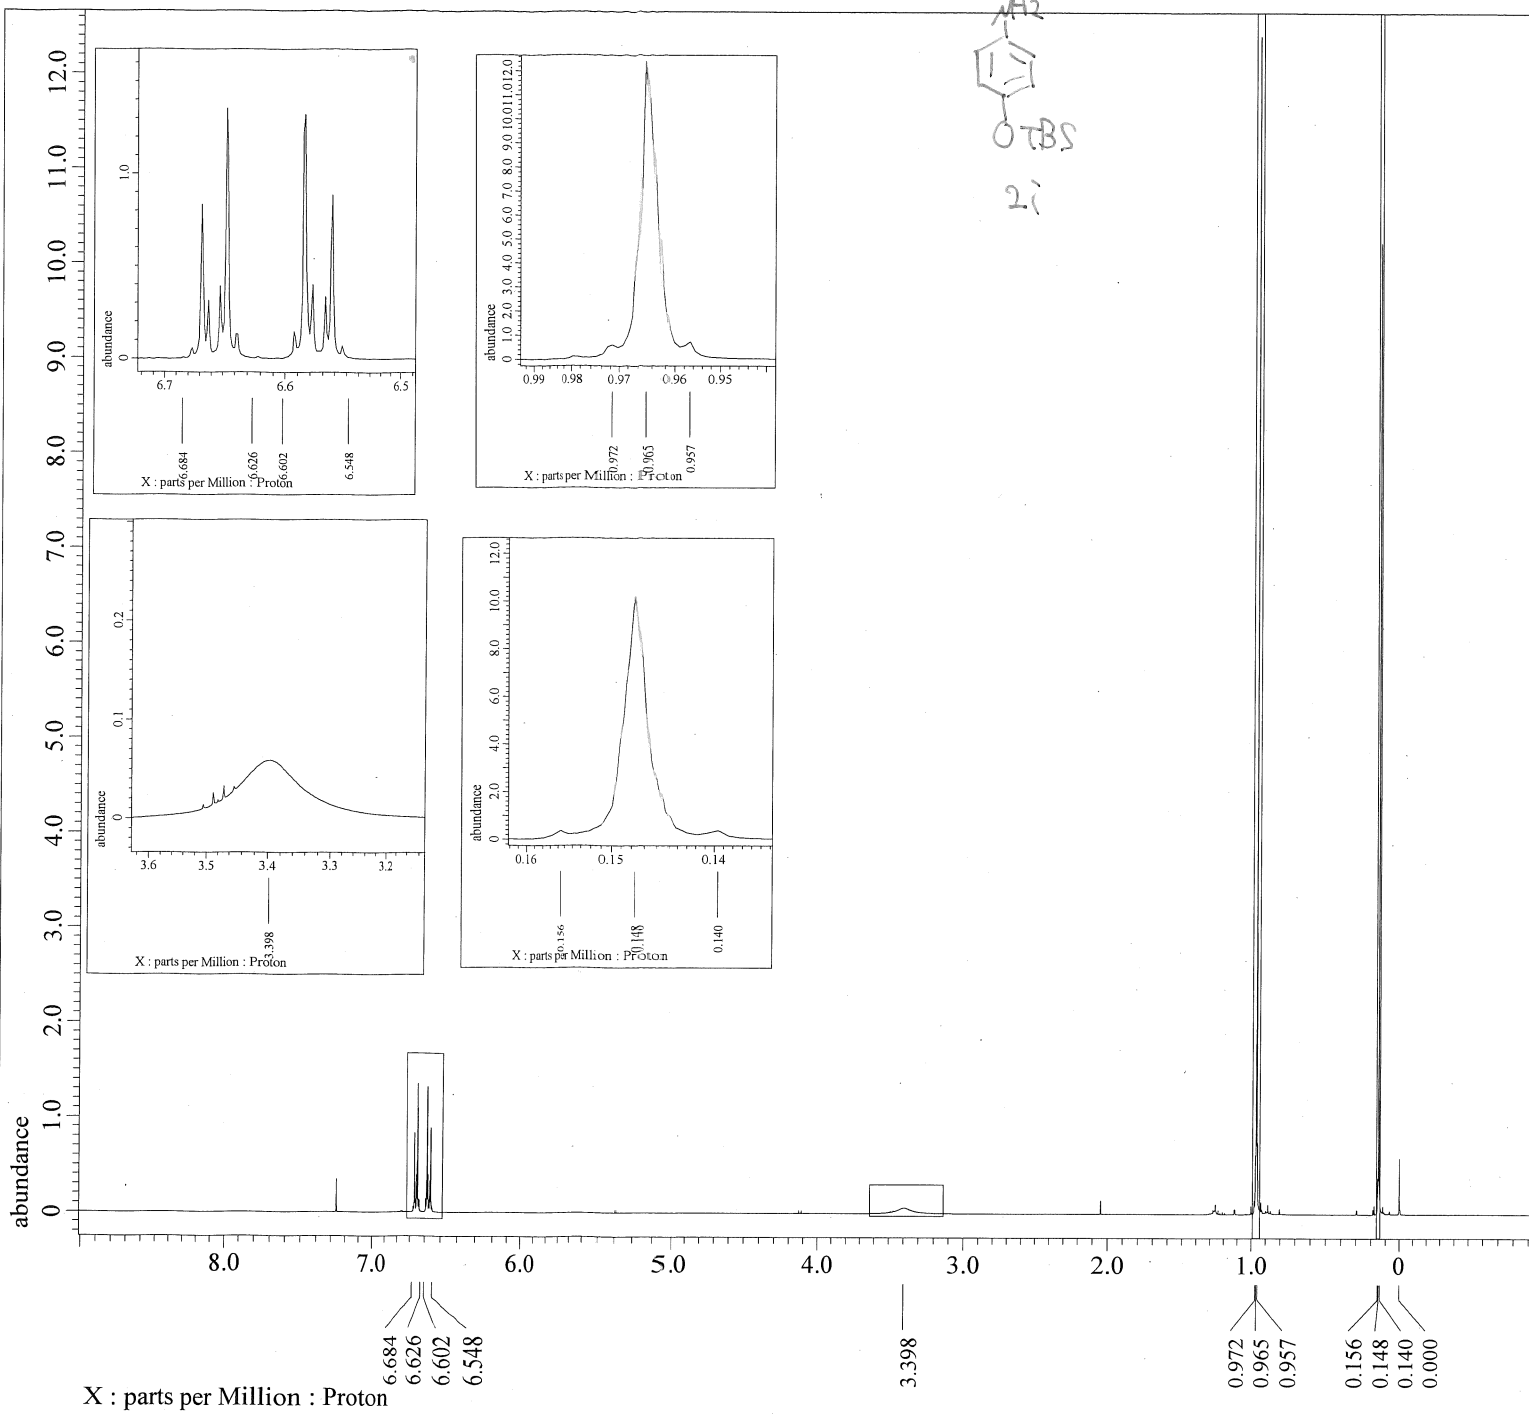

```

---- PROCESSING PARAMETERS ----
sexp( 0.2[Hz], 0.0[s] )
trapezoid( 0[%], 0[%], 80[%], 100[%] )
zerofill( 1 )
fft( 1, TRUE, TRUE )
machinephase
ppm

Derived from: ASH-124-pure 1_Proton-1-1.jdf

Filename      = ASH-124-pure 1_Proton
Author        = element
Experiment     = proton_auto.jxp
Sample_Id     = ASH-124-pure 1
Solvent       = CHLOROFORM-D
Actual_Start_Time = 4-AUG-2024 20:17:49
Revision_Time  = 12-NOV-2024 10:02:06

Comment       = single_pulse
Data_Format   = 1D COMPLEX
Dim_Size      = 13107
X_Domain      = Proton
Dim_Title     = Proton
Dim_Units     = [ppm]
Dimensions    = X
Spectrometer  = DELTA2_NMR

Field_Strength = 9.2982153[T] (400[MHz]
X_Acq_Duration = 2.20725248[s]
X_Domain       = Proton
X_Freq         = 395.88430144[MHz]
X_Offset       = 5[ppm]
X_Points       = 16384
X_Prescans     = 1
X_Resolution   = 0.45305193[Hz]
X_Sweep        = 7.42280285[kHz]
X_Sweep_Clippped = 5.93824228[kHz]
Irr_Domain     = Proton
Irr_Freq       = 395.88430144[MHz]
Irr_Offset     = 5[ppm]
Tri_Domain     = Proton
Tri_Freq       = 395.88430144[MHz]
Tri_Offset     = 5[ppm]
Blanking       = 2[us]
Clipped        = FALSE
Scans          = 8
Total_Scans    = 8

Relaxation_Delay = 5[s]
Recvr_Gain       = 46
Temp_Get         = 20.7[dc]
X_90_Width      = 6.34[us]
X_Acq_Time      = 2.20725248[s]
X_Angle         = 45[deg]
X_Atn           = 5[dB]
X_Pulse         = 3.17[us]
Irr_Mode        = Off
Tri_Mode        = Off
Dante_Loop      = 500
Dante_Presat    = FALSE
Decimation_Rate = 0
Experiment_Path = C:\Program Files\JEOL
Initial_Wait    = 1[s]
Phase           = {0, 90, 270, 180, 180
Presat_Time     = 5[s]
  
```

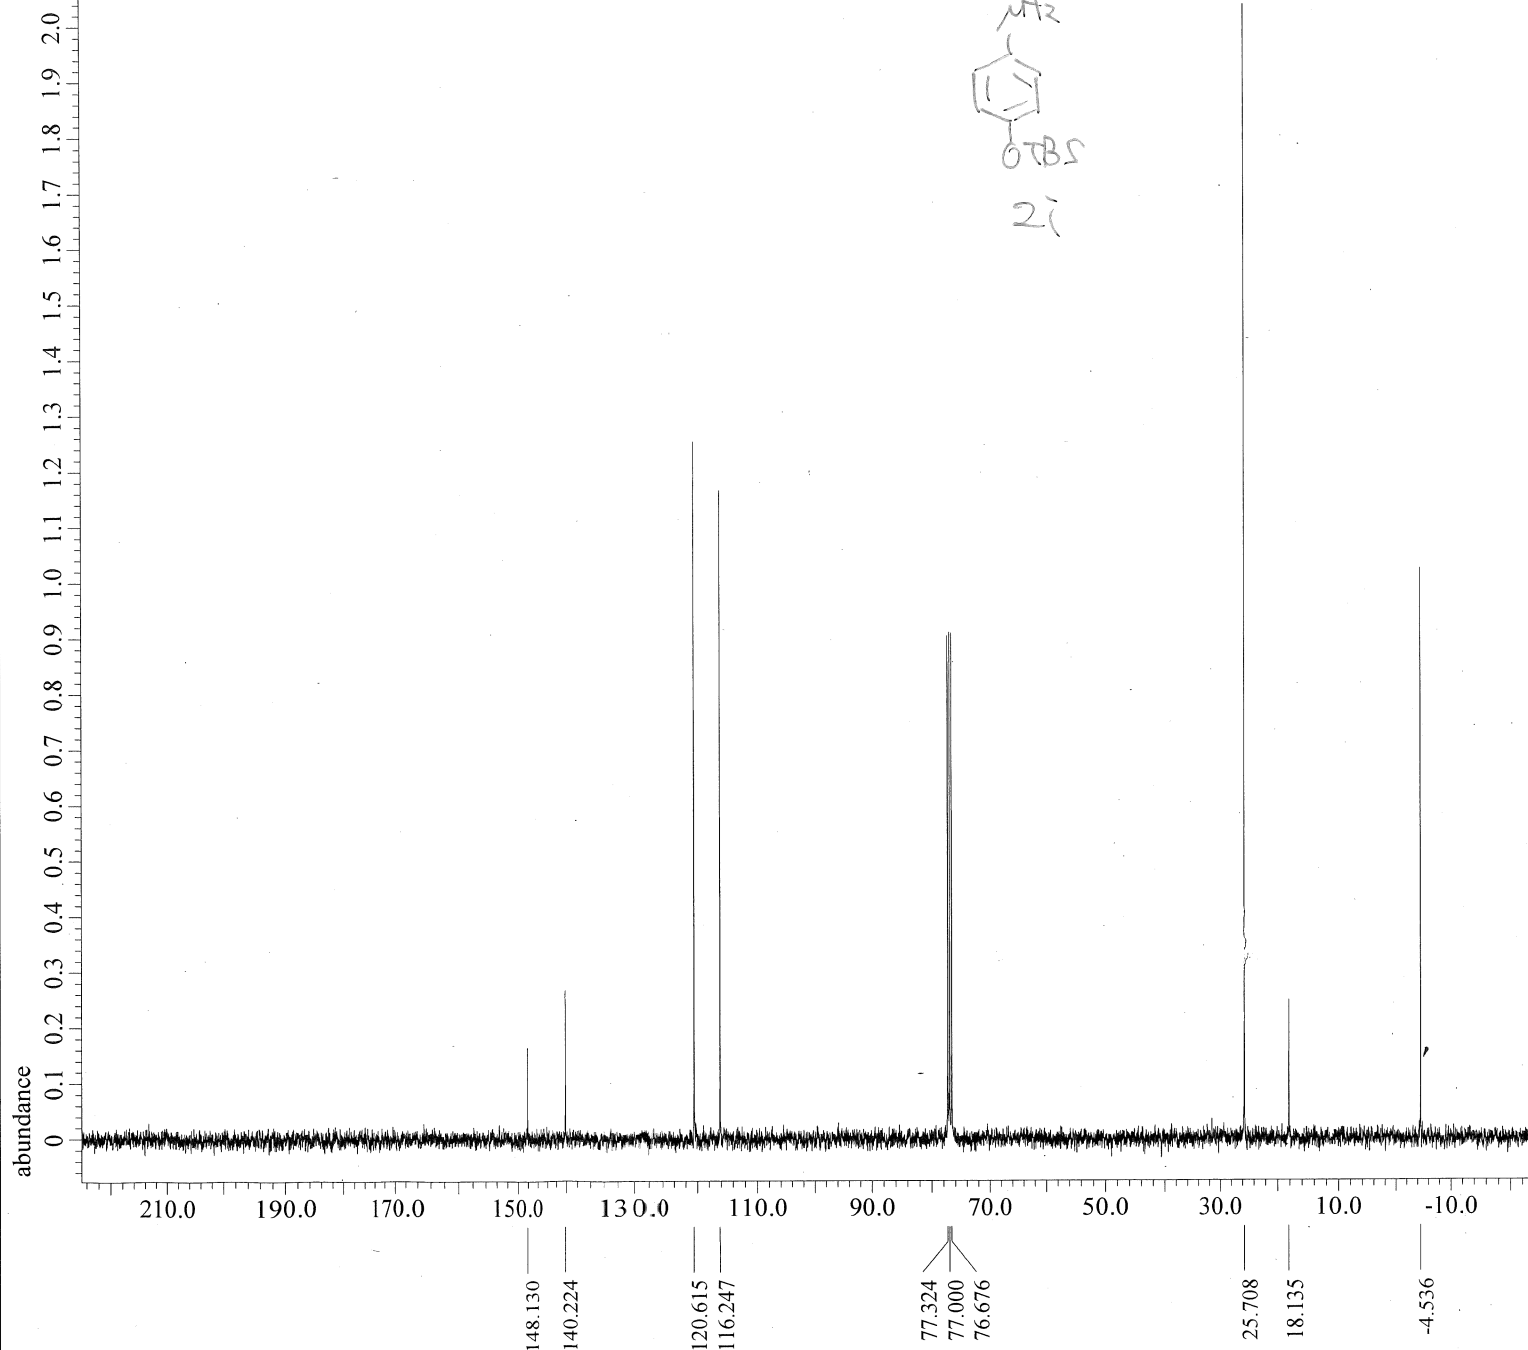

----- PROCESSING PARAMETERS -----  
 dc\_balance( 0, FALSE )  
 sexp( 2.0[Hz], 0.0[s] )  
 trapezoid3( 0[%], 80[%], 100[%] )  
 zerofill( 1 )  
 fft( 1, TRUE, TRUE )  
 machinephase  
 ppm

Derived from: ASH-124-13C-1.jdf

Filename = ASH-124-13C-2.jdf  
 Author = element  
 Experiment = single\_pulse\_dec  
 Sample Id = 1  
 Solvent = CHLOROFORM-D  
 Actual\_Start\_Time = 5-AUG-2024 16:04:15  
 Revision\_Time = 5-AUG-2024 10:21:37

Comment = single pulse decoupled ga  
 Data\_Format = 1D COMPLEX  
 Dim\_Size = 26214  
 X\_Domain = 13C  
 Dim\_Title = 13C  
 Dim\_Units = [ppm]  
 Dimensions = X  
 Site = ECS 400  
 Spectrometer = JNM-ECS400

Field\_Strength = 9.20197068[T] (390[MHz])  
 X\_Acq\_Duration = 1.06430464[s]  
 X\_Domain = 13C  
 X\_Freq = 98.51479726[MHz]  
 X\_Offset = 100[ppm]  
 X\_Points = 32768  
 X\_Prescans = 4  
 X\_Resolution = 0.93958061[Hz]  
 X\_Sweep = 30.78817734[kHz]  
 Irr\_Domain = 1H  
 Irr\_Freq = 391.78655441[MHz]  
 Irr\_Offset = 5[ppm]  
 Clipped = FALSE  
 Scans = 62  
 Total\_Scans = 62

Relaxation\_Delay = 2[s]  
 Recvr\_Gain = 60  
 Temp\_Get = 20.5[dC]  
 X\_90\_Width = 9.46[us]  
 X\_Acq\_Time = 1.06430464[s]  
 X\_Angle = 30[deg]  
 X\_Atn = 4.9[dB]  
 X\_Pulse = 3.15333333[us]  
 Irr\_Atn\_Dec = 22.45[dB]  
 Irr\_Atn\_Noie = 22.45[dB]  
 Irr\_Noise = WALTZ  
 Decoupling = TRUE  
 Initial\_Wait = 1[s]  
 Noe = TRUE  
 Noe\_Time = 2[s]  
 Repetition\_Time = 3.06430464[s]

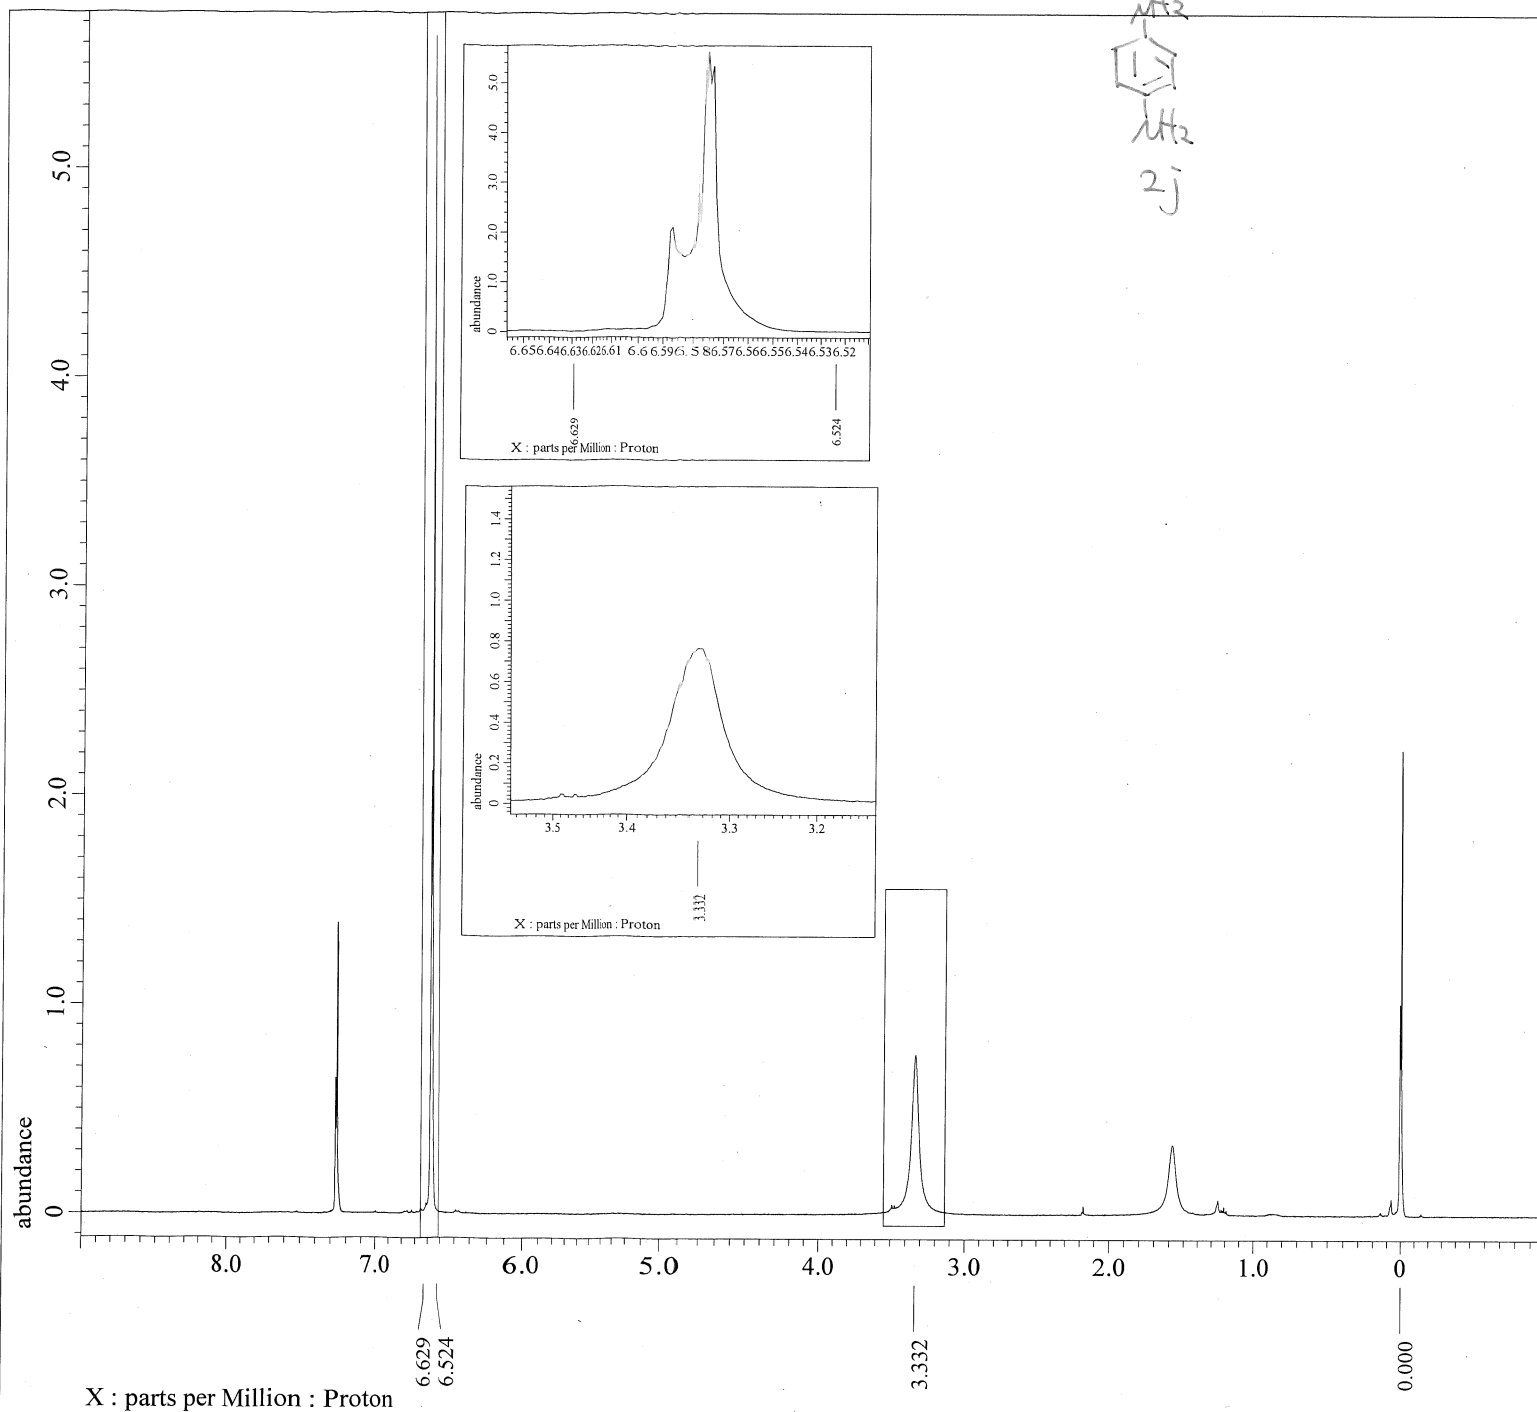

---- PROCESSING PARAMETERS ----

```

dc_balance( 0, FALSE )
sexp( 0.2[Hz], 0.0[s] )
trapezoid( 0[%], 0[%], 80[%], 100[%] )
zerofill( 1 )
fft( 1, TRUE, TRUE )
machinephase
ppm

```

Derived from: ASH-115-pure2\_Proton-1-1.jdf

```

Filename      = ASH-115-pure2_Proton-1-2.
Author       = element
Experiment    = proton.jxp
Sample_Id    = ASH-115-pure2
Solvent      = CHLOROFORM-D
Actual_Start_Time = 26-JUL-2024 10:00:11
Revision_Time  = 12-NOV-2024 10:05:45

```

```

Comment      = single_pulse
Data_Format   = 1D_COMPLEX
Dim_Size      = 13107
X_Domain     = Proton
Dim_Title    = Proton
Dim_Units    = [ppm]
Dimensions   = X
Spectrometer  = DELTA2_NMR

```

```

Field_Strength = 9.4073814[T] (400[MHz])
X_Acq_Duration = 2.18103808[s]
X_Domain      = 1H
X_Freq       = 400.53219825[MHz]
X_Offset     = 5[ppm]
X_Points     = 16384
X_Prescans   = 1
X_Resolution = 0.45849727[Hz]
X_Sweep      = 7.51201923[kHz]
X_Sweep_Clipped = 6.00961538[kHz]
Irr_Domain   = Proton
Irr_Freq     = 400.53219825[MHz]
Irr_Offset   = 5[ppm]
Tri_Domain   = Proton
Tri_Freq     = 400.53219825[MHz]
Tri_Offset   = 5[ppm]
Clipped      = FALSE
Scans        = 8
Total_Scans  = 8

```

```

Relaxation_Delay = 5[s]
Recvr_Gain       = 48
Temp_Get         = 20.4[dC]
X_90_Width      = 6.7[us]
X_Acq_Time      = 2.18103808[s]
X_Angle         = 45[deg]
X_Atn           = 0.8[dB]
X_Pulse         = 3.35[us]
Irr_Mode        = Off
Tri_Mode        = Off
Dante_Presat    = FALSE
Initial_Wait    = 1[s]
Repetition_Time = 7.18103808[s]

```

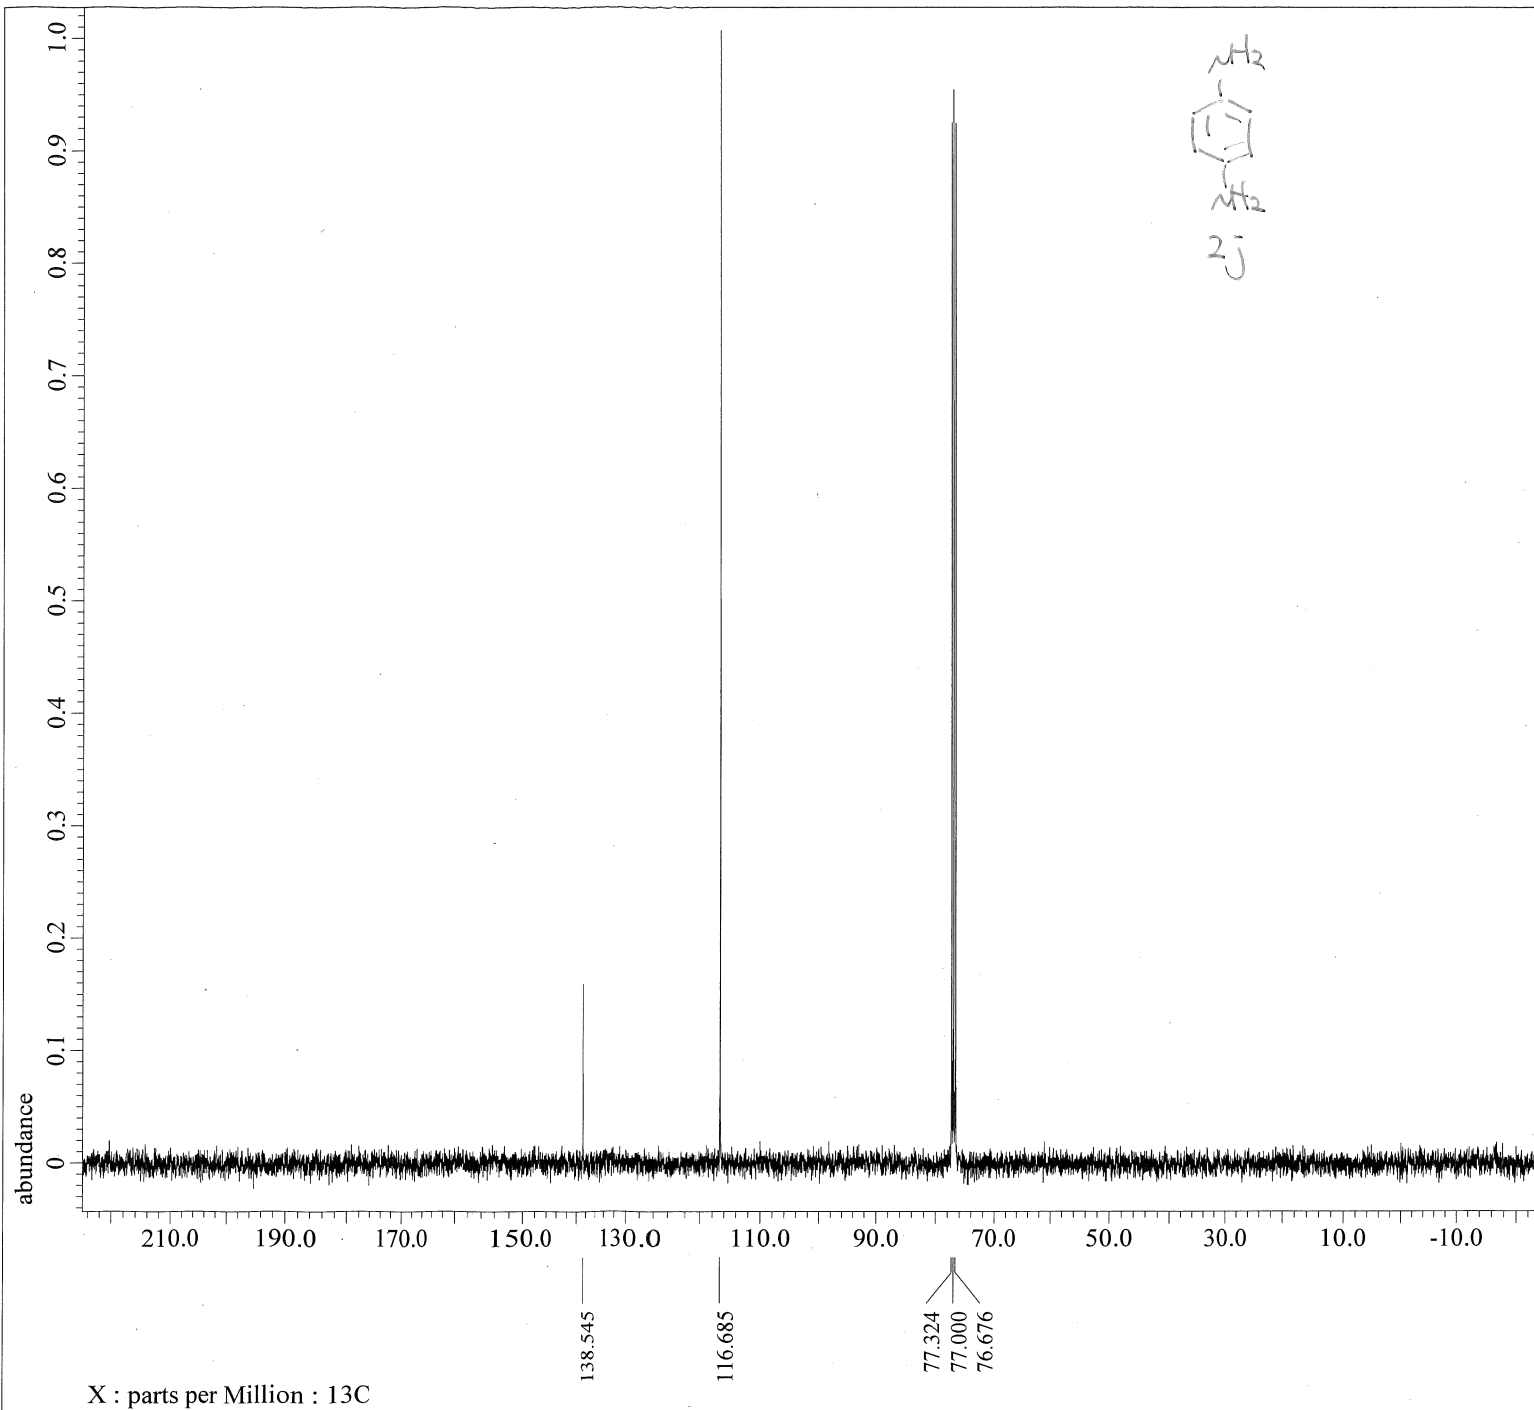

---- PROCESSING PARAMETERS ----  
dc\_balance( 0, FALSE )  
sexf( 2.0[Hz], 0.0[s] )  
trapezoid3( 0[%], 80[%], 100[%] )  
zerofill( 1 )  
fft( 1, TRUE, TRUE )  
machinephase  
ppm

Derived from: ASH-115-13C-2-1.jdf

Filename = ASH-115-13C-2-2.jdf  
Author = element  
Experiment = single\_pulse\_dec  
Sample\_Id = 1  
Solvent = CHLOROFORM-D  
Actual\_Start\_Time = 26-JUL-2024 16:25:23  
Revision\_Time = 12-NOV-2024 11:09:52  
  
Comment = single pulse decoupled ga  
Data\_Format = 1D COMPLEX  
Dim\_Size = 26214  
X\_Domain = 13C  
Dim\_Title = 13C  
Dim\_Units = [ppm]  
Dimensions = X  
Site = ECS 400  
Spectrometer = JNM-ECS400  
  
Field\_Strength = 9.20197068[T] (390[MHz])  
X\_Acq\_Duration = 1.06430464[s]  
X\_Domain = 13C  
X\_Freq = 98.51479726[MHz]  
X\_Offset = 100[ppm]  
X\_Points = 32768  
X\_Prescans = 4  
X\_Resolution = 0.93958061[Hz]  
X\_Sweep = 30.78817734[kHz]  
Irr\_Domain = 1H  
Irr\_Freq = 391.78655441[MHz]  
Irr\_Offset = 5[ppm]  
Clipped = FALSE  
Scans = 133  
Total\_Scans = 133  
  
Relaxation\_Delay = 2[s]  
Recvr\_Gain = 60  
Temp\_Get = 22.7[dC]  
X\_90\_Width = 9.46[us]  
X\_Acq\_Time = 1.06430464[s]  
X\_Angle = 30[deg]  
X\_Atn = 4.9[dB]  
X\_Pulse = 3.15333333[us]  
Irr\_Atn\_Dec = 22.45[dB]  
Irr\_Atn\_No = 22.45[dB]  
Irr\_Noise = WALTZ  
Decoupling = TRUE  
Initial\_Wait = 1[s]  
Noe = TRUE  
Noe\_Time = 2[s]  
Repetition\_Time = 3.06430464[s]

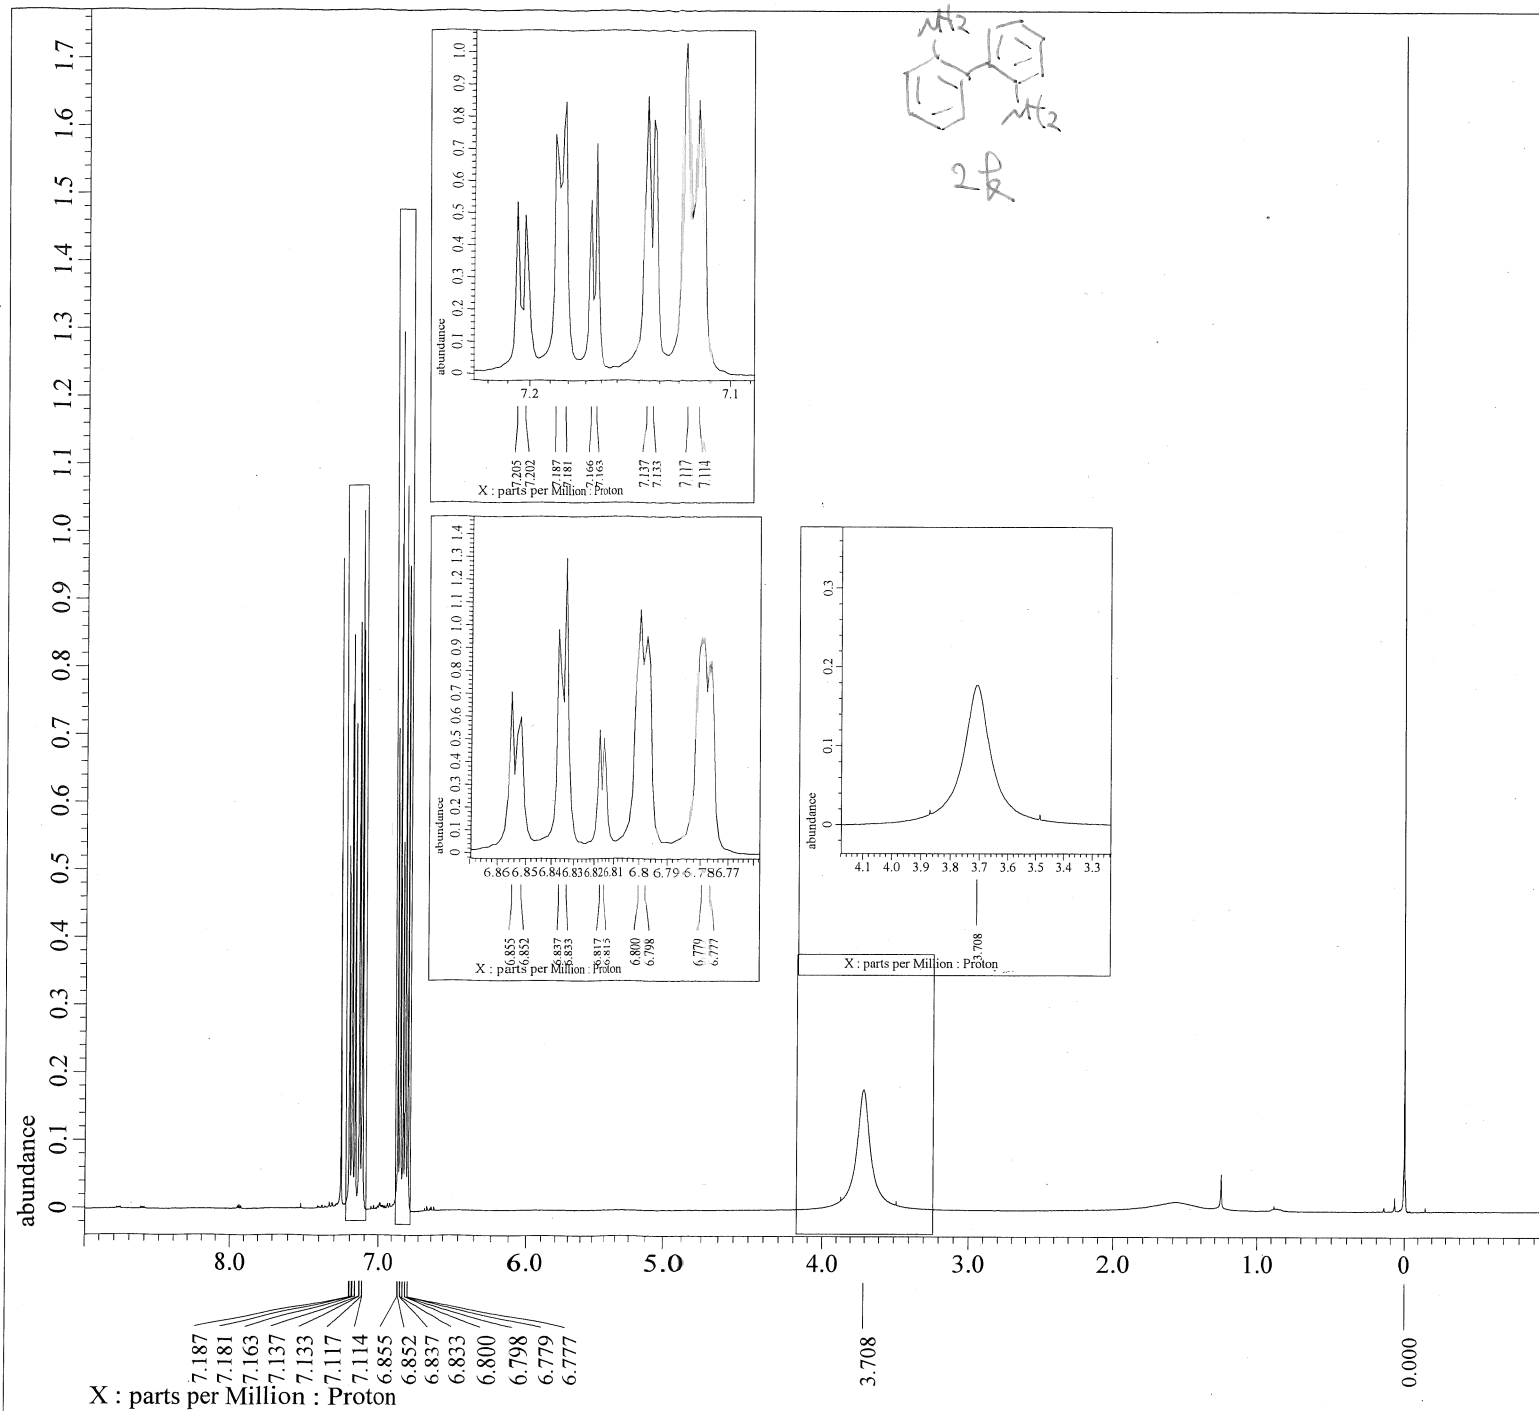

----- PROCESSING PARAMETERS -----

sexf( 0.2[Hz], 0.0[s] )  
 trapezoid( 0[%], 0[%], 80[%], 100[%] )  
 zerofill( 1 )  
 fft( 1, TRUE, TRUE )  
 machinephase  
 ppm

Derived from: ASH-101-pure2\_Proton-1-1.jdf

|                   |                          |
|-------------------|--------------------------|
| Filename          | = ASH-101-pure2_Proton-  |
| Author            | = element                |
| Experiment        | = proton_auto.jxp        |
| Sample_Id         | = ASH-101-pure2          |
| Solvent           | = CHLOROFORM-D           |
| Actual_Start_Time | = 27-JUL-2024 14:44:32   |
| Revision_Time     | = 12-NOV-2024 10:09:08   |
| Comment           | = single_pulse           |
| Data_Format       | = 1D COMPLEX             |
| Dim_Size          | = 13107                  |
| X_Domain          | = Proton                 |
| Dim_Title         | = Proton                 |
| Dim_Units         | = [ppm]                  |
| Dimensions        | = X                      |
| Spectrometer      | = DELTA2_NMR             |
| Field_Strength    | = 9.2982153[T] (400[MHz] |
| X_Acq_Duration    | = 2.20725248[s]          |
| X_Domain          | = Proton                 |
| X_Freq            | = 395.88430144[MHz]      |
| X_Offset          | = 5[ppm]                 |
| X_Points          | = 16384                  |
| X_Prescans        | = 1                      |
| X_Resolution      | = 0.45305193[Hz]         |
| X_Sweep           | = 7.42280285[kHz]        |
| X_Sweep_Clippped  | = 5.93824228[kHz]        |
| Irr_Domain        | = Proton                 |
| Irr_Freq          | = 395.88430144[MHz]      |
| Irr_Offset        | = 5[ppm]                 |
| Tri_Domain        | = Proton                 |
| Tri_Freq          | = 395.88430144[MHz]      |
| Tri_Offset        | = 5[ppm]                 |
| Blanking          | = 2[us]                  |
| Clipped           | = FALSE                  |
| Scans             | = 8                      |
| Total_Scans       | = 8                      |
| Relaxation_Delay  | = 5[s]                   |
| Recvr_Gain        | = 56                     |
| Temp_Get          | = 21.5[dC]               |
| X_90_Width        | = 6.34[us]               |
| X_Acq_Time        | = 2.20725248[s]          |
| X_Angle           | = 45[deg]                |
| X_Atn             | = 5[dB]                  |
| X_Pulse           | = 3.17[us]               |
| Irr_Mode          | = Off                    |
| Tri_Mode          | = Off                    |
| Dante_Loop        | = 500                    |
| Dante_Presat      | = FALSE                  |
| Decimation_Rate   | = 0                      |
| Experiment_Path   | = C:\Program Files\JEOL  |
| Initial_Wait      | = 1[s]                   |
| Phase             | = {0, 90, 270, 180, 180  |
| Presat_Time       | = 5[s]                   |

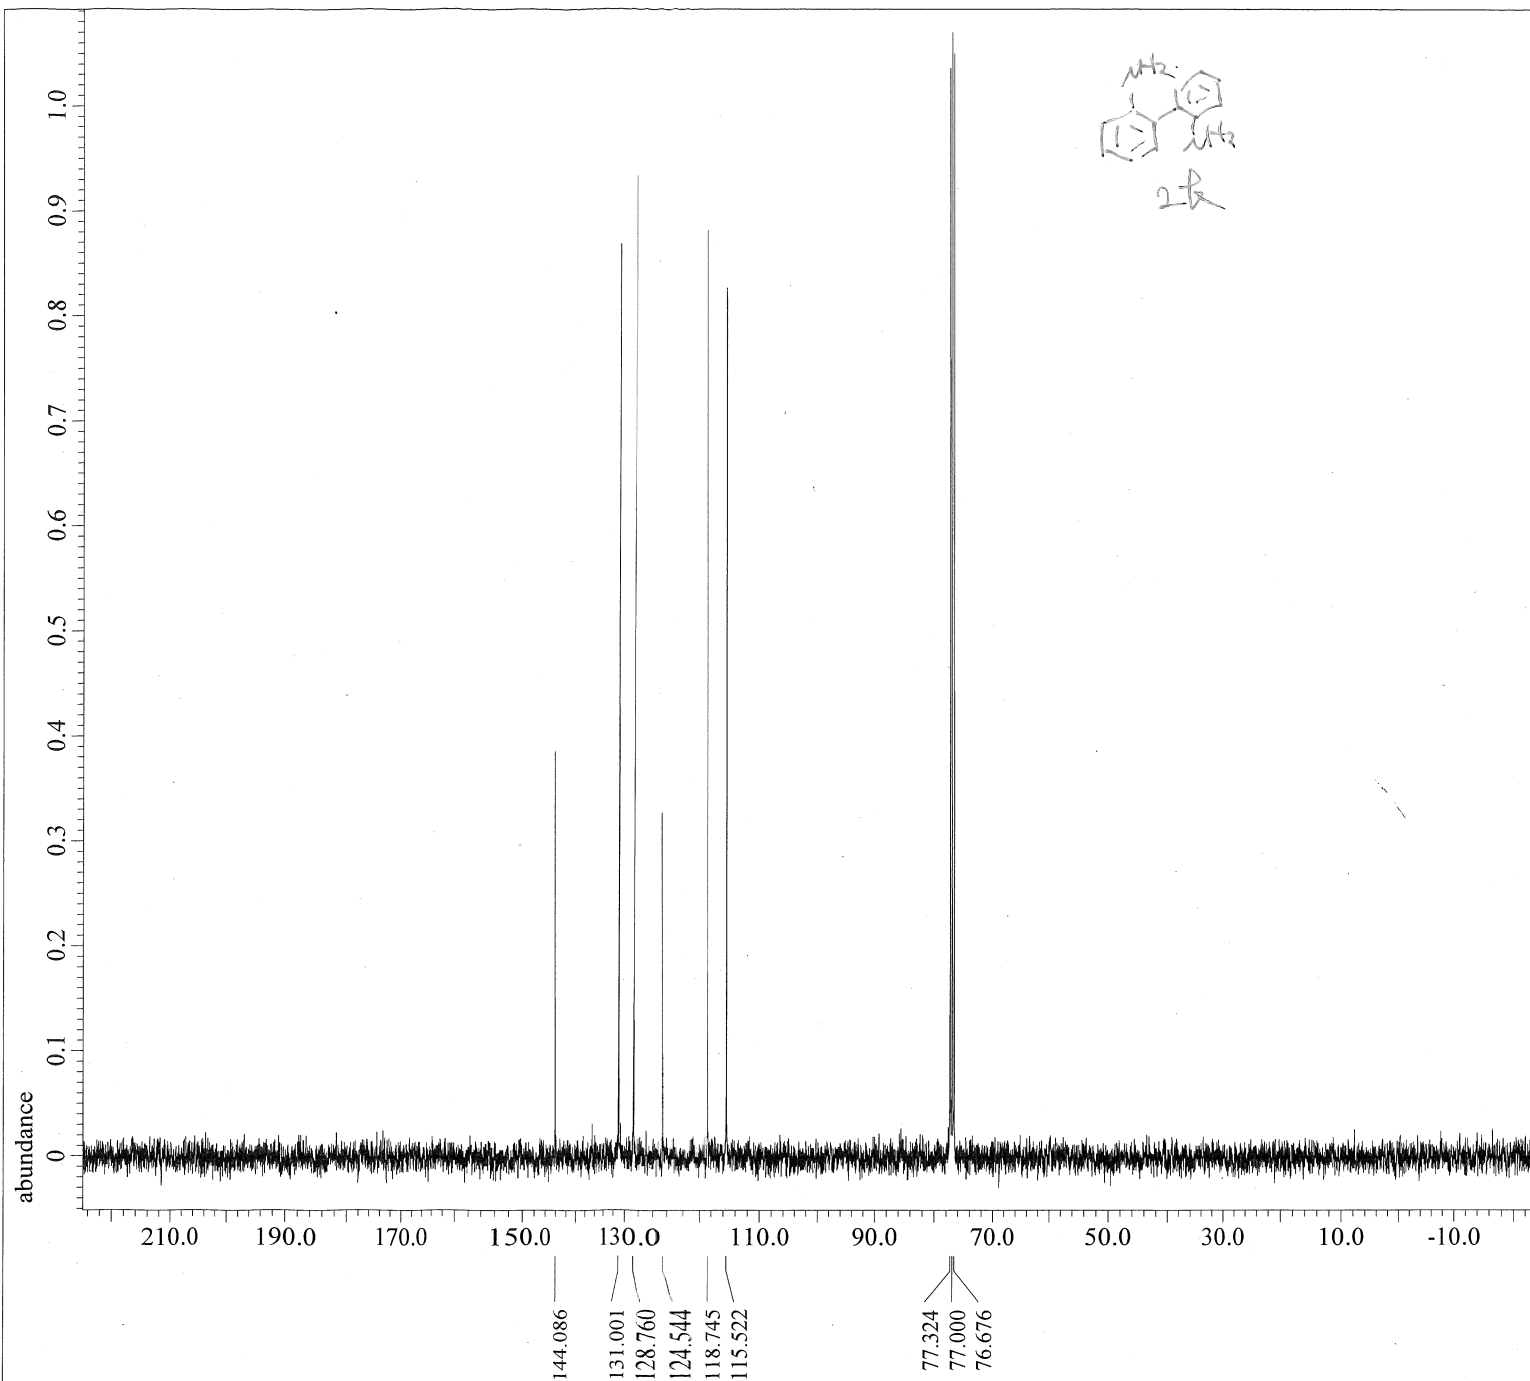

X : parts per Million : 13C

----- PROCESSING PARAMETERS -----  
dc balance( 0, FALSE )  
sexp( 2.0[Hz], 0.0[s] )  
trapezoid3( 0[%], 80[%], 100[%] )  
zerofill( 1 )  
fft( 1, TRUE, TRUE )  
machinephase  
ppm

Derived from: ASH-101-13C-1.jdf

Filename = ASH-101-13C-2.jdf  
Author = element  
Experiment = single\_pulse\_dec  
Sample Id = 1  
Solvent = CHLOROFORM-D  
Actual\_Start\_Time = 27-JUL-2024 23:15:02  
Revision\_Time = 27-JUL-2024 17:17:34

Comment = single pulse decoupled ga  
Data\_Format = 1D COMPLEX  
Dim\_Size = 26214  
X\_Domain = 13C  
Dim\_Title = 13C  
Dim\_Units = [ppm]  
Dimensions = X  
Site = ECS 400  
Spectrometer = JNM-ECS400

Field\_Strength = 9.20197068[T] (390[MHz])  
X\_Acq\_Duration = 1.06430464[s]  
X\_Domain = 13C  
X\_Freq = 98.51479726[MHz]  
X\_Offset = 100[ppm]  
X\_Points = 32768  
X\_Prescans = 4  
X\_Resolution = 0.93958061[Hz]  
X\_Sweep = 30.78817734[kHz]  
Irr\_Domain = 1H  
Irr\_Freq = 391.78655441[MHz]  
Irr\_Offset = 5[ppm]  
Clipped = FALSE  
Scans = 75  
Total\_Scans = 75

Relaxation\_Delay = 2[s]  
Recvr\_Gain = 60  
Temp\_Get = 22.7[dC]  
X\_90\_Width = 9.46[us]  
X\_Acq\_Time = 1.06430464[s]  
X\_Angle = 30[deg]  
X\_Atn = 4.9[dB]  
X\_Pulse = 3.15333333[us]  
Irr\_Atn\_Dec = 22.45[dB]  
Irr\_Atn\_Noe = 22.45[dB]  
Irr\_Noise = WALTZ  
Decoupling = TRUE  
Initial\_Wait = 1[s]  
Noe = TRUE  
Noe\_Time = 2[s]  
Repetition\_Time = 3.06430464[s]

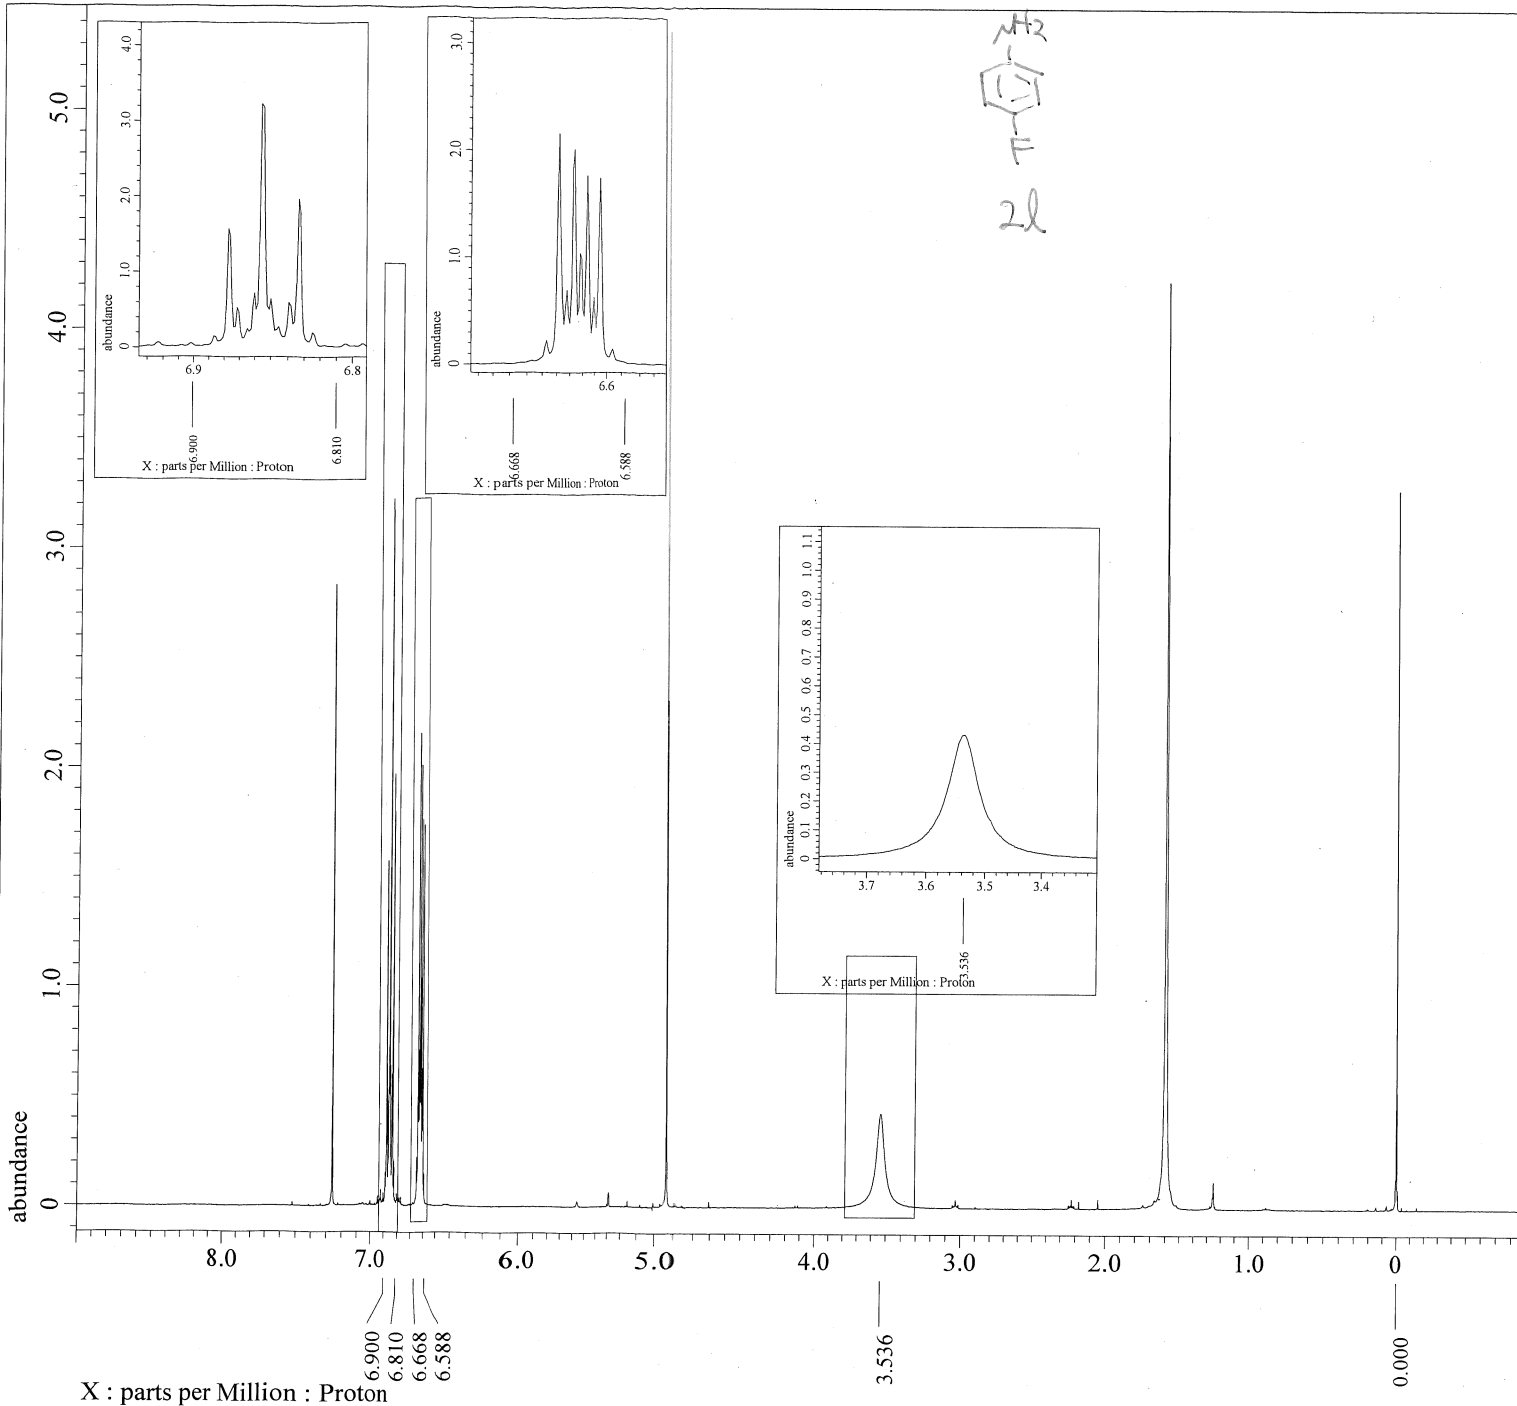

```

---- PROCESSING PARAMETERS ----
dc balance( 0, FALSE )
sexf( 0.2[Hz], 0.0[s] )
trapezoid( 0[%], 0[%], 80[%], 100[%] )
zerofill( 1 )
fft( 1, TRUE, TRUE )
machinephase
ppm

```

Derived from: ASH-109-crude\_Proton-1-1.jdf

```

Filename      = ASH-109-crude_Proton-1-2.
Author        = element
Experiment     = proton.jpg
Sample_Id     = ASH-109-crude
Solvent       = CHLOROFORM-D
Actual_Start_Time = 22-JUL-2024 11:09:06
Revision_Time  = 12-NOV-2024 10:12:48

```

```

Comment       = single_pulse
Data_Format   = 1D_COMPLEX
Dim_Size      = 13107
X_Domain      = Proton
Dim_Title     = Proton
Dim_Units     = [ppm]
Dimensions    = X
Spectrometer  = DELTA2_NMR

```

```

Field_Strength = 9.4073814[T] (400[MHz])
X_Acq_Duration = 2.18103808[s]
X_Domain       = 1H
X_Freq         = 400.53219825 [MHz]
X_Offset       = 5[ppm]
X_Points       = 16384
X_Prescans     = 1
X_Resolution   = 0.45849727 [Hz]
X_Sweep        = 7.51201923 [kHz]
X_Sweep_Clippped = 6.00961538 [kHz]
Irr_Domain     = Proton
Irr_Freq       = 400.53219825 [MHz]
Irr_Offset     = 5[ppm]
Tri_Domain     = Proton
Tri_Freq       = 400.53219825 [MHz]
Tri_Offset     = 5[ppm]
Clipped        = FALSE
Scans          = 8
Total_Scans    = 8

```

```

Relaxation_Delay = 5[s]
Recvr_Gain       = 44
Temp_Get         = 21.7[dC]
X_90_Width      = 6.7[us]
X_Acq_Time       = 2.18103808[s]
X_Angle         = 45[deg]
X_Atn           = 0.8[dB]
X_Pulse         = 3.35[us]
Irr_Mode        = Off
Tri_Mode        = Off
Dante_Presat    = FALSE
Initial_Wait    = 1[s]
Repetition_Time = 7.18103808[s]

```

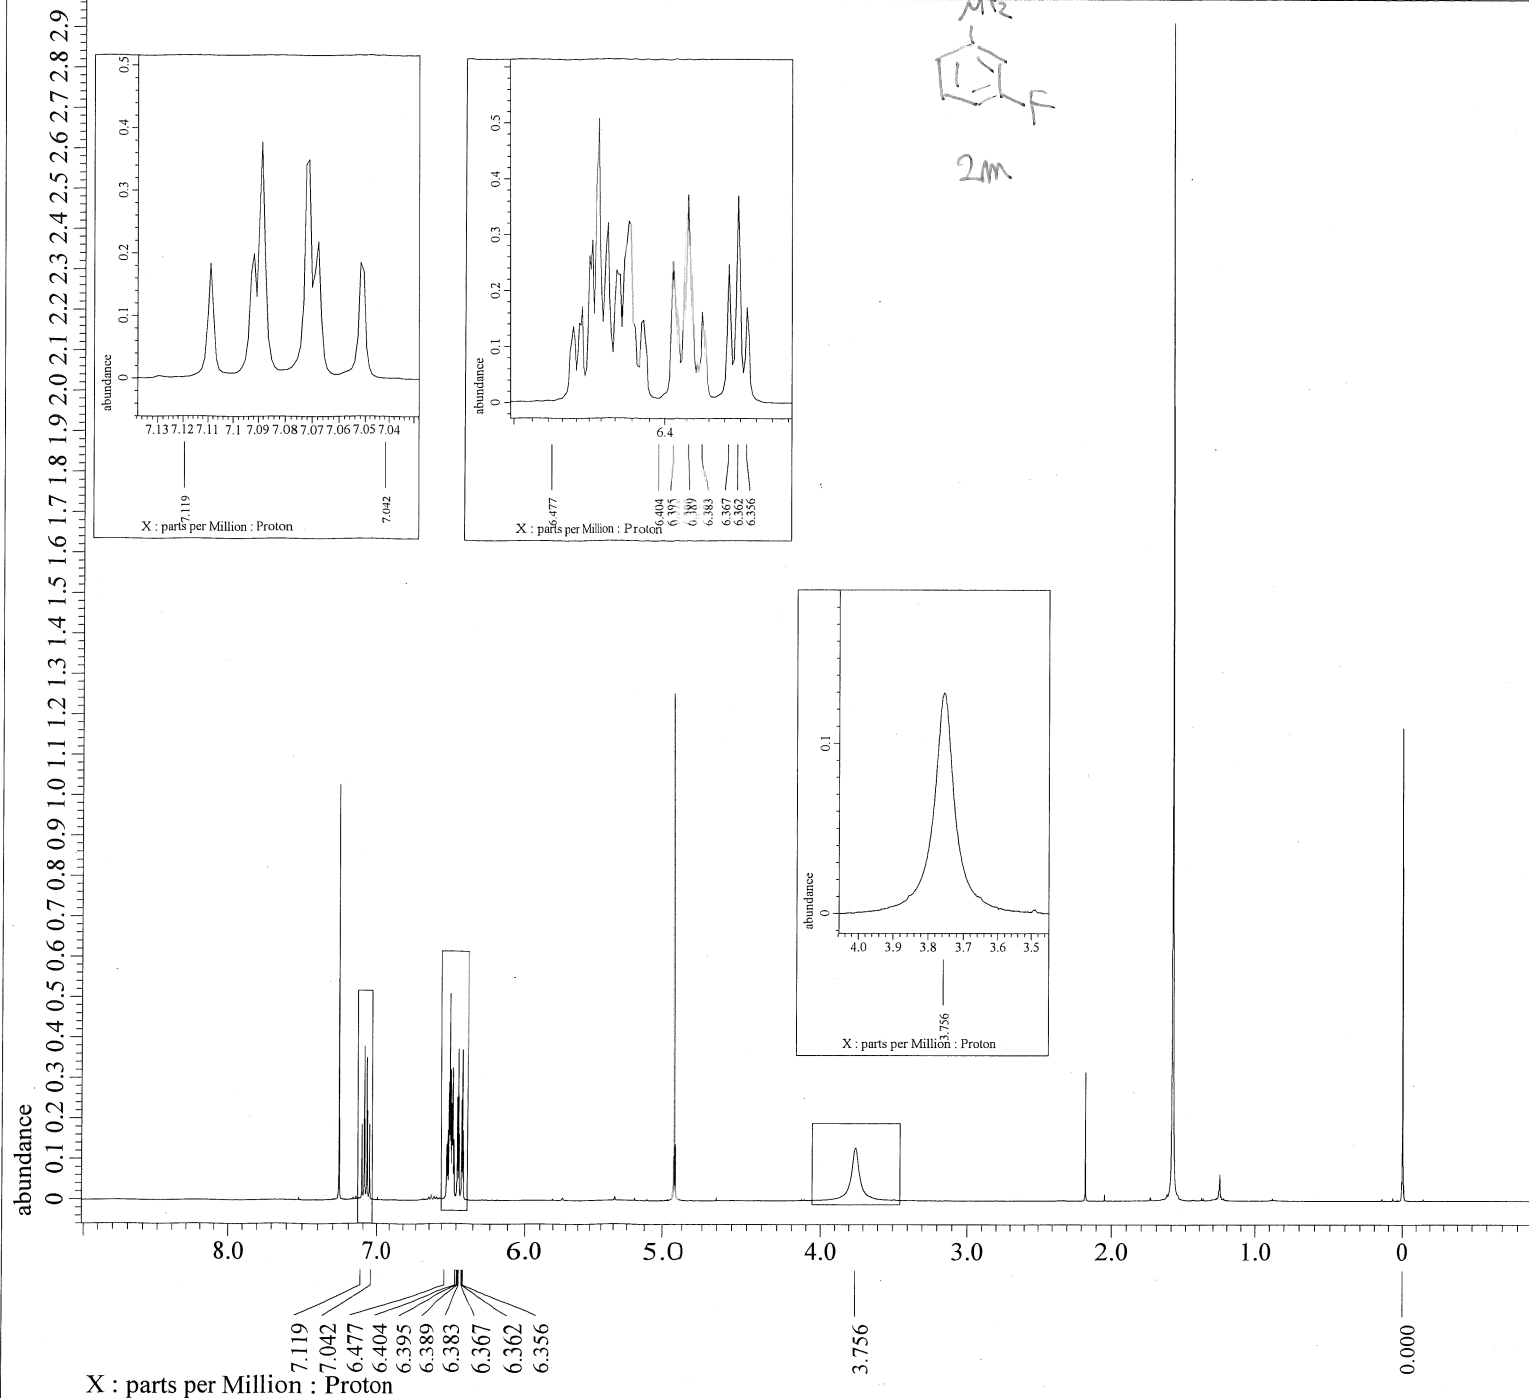

----- PROCESSING PARAMETERS -----

```

sexf( 0.2[Hz], 0.0[s] )
trapezoid( 0[%], 0[%], 80[%], 100[%] )
zerofill( 1 )
fft( 1, TRUE, TRUE )
machinephase
ppm

Derived from: ASH-107-crude_Proton-1-1.jdf

```

|                   |                          |
|-------------------|--------------------------|
| Filename          | = ASH-107-crude_Proton-  |
| Author            | = element                |
| Experiment        | = proton_auto.jxp        |
| Sample Id         | = ASH-107-crude          |
| Solvent           | = CHLOROFORM-D           |
| Actual_Start_Time | = 20-JUL-2024 19:59:00   |
| Revision_Time     | = 12-NOV-2024 10:17:19   |
| Comment           | = single pulse           |
| Data_Format       | = 1D COMPLEX             |
| Dim_Size          | = 13107                  |
| X_Domain          | = Proton                 |
| Dim_Title         | = Proton                 |
| Dim_Units         | = [ppm]                  |
| Dimensions        | = X                      |
| Spectrometer      | = DELTA2_NMR             |
| Field_Strength    | = 9.2982153[T] (400[MHz] |
| X_Acq_Duration    | = 2.20725248[s]          |
| X_Domain          | = Proton                 |
| X_Freq            | = 395.88430144[MHz]      |
| X_Offset          | = 5[ppm]                 |
| X_Points          | = 16384                  |
| X_Prescans        | = 1                      |
| X_Resolution      | = 0.45305193[Hz]         |
| X_Sweep           | = 7.42280285[kHz]        |
| X_Sweep_Clippped  | = 5.93824228[kHz]        |
| Irr_Domain        | = Proton                 |
| Irr_Freq          | = 395.88430144[MHz]      |
| Irr_Offset        | = 5[ppm]                 |
| Tri_Domain        | = Proton                 |
| Tri_Freq          | = 395.88430144[MHz]      |
| Tri_Offset        | = 5[ppm]                 |
| Blanking          | = 2[us]                  |
| Clipped           | = FALSE                  |
| Scans             | = 8                      |
| Total_Scans       | = 8                      |
| Relaxation_Delay  | = 5[s]                   |
| Recvr_Gain        | = 56                     |
| Temp_Get          | = 21.5[dC]               |
| X_90_Width        | = 6.34[us]               |
| X_Acq_Time        | = 2.20725248[s]          |
| X_Angle           | = 45[deg]                |
| X_Atn             | = 5[dB]                  |
| X_Pulse           | = 3.17[us]               |
| Irr_Mode          | = Off                    |
| Tri_Mode          | = Off                    |
| Dante_Loop        | = 500                    |
| Dante_Presat      | = FALSE                  |
| Decimation_Rate   | = 0                      |
| Experiment_Path   | = C:\Program Files\JEOL  |
| Initial_Wait      | = 1[s]                   |
| Phase             | = {0, 90, 270, 180, 180  |
| Presat_Time       | = 5[s]                   |

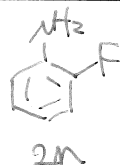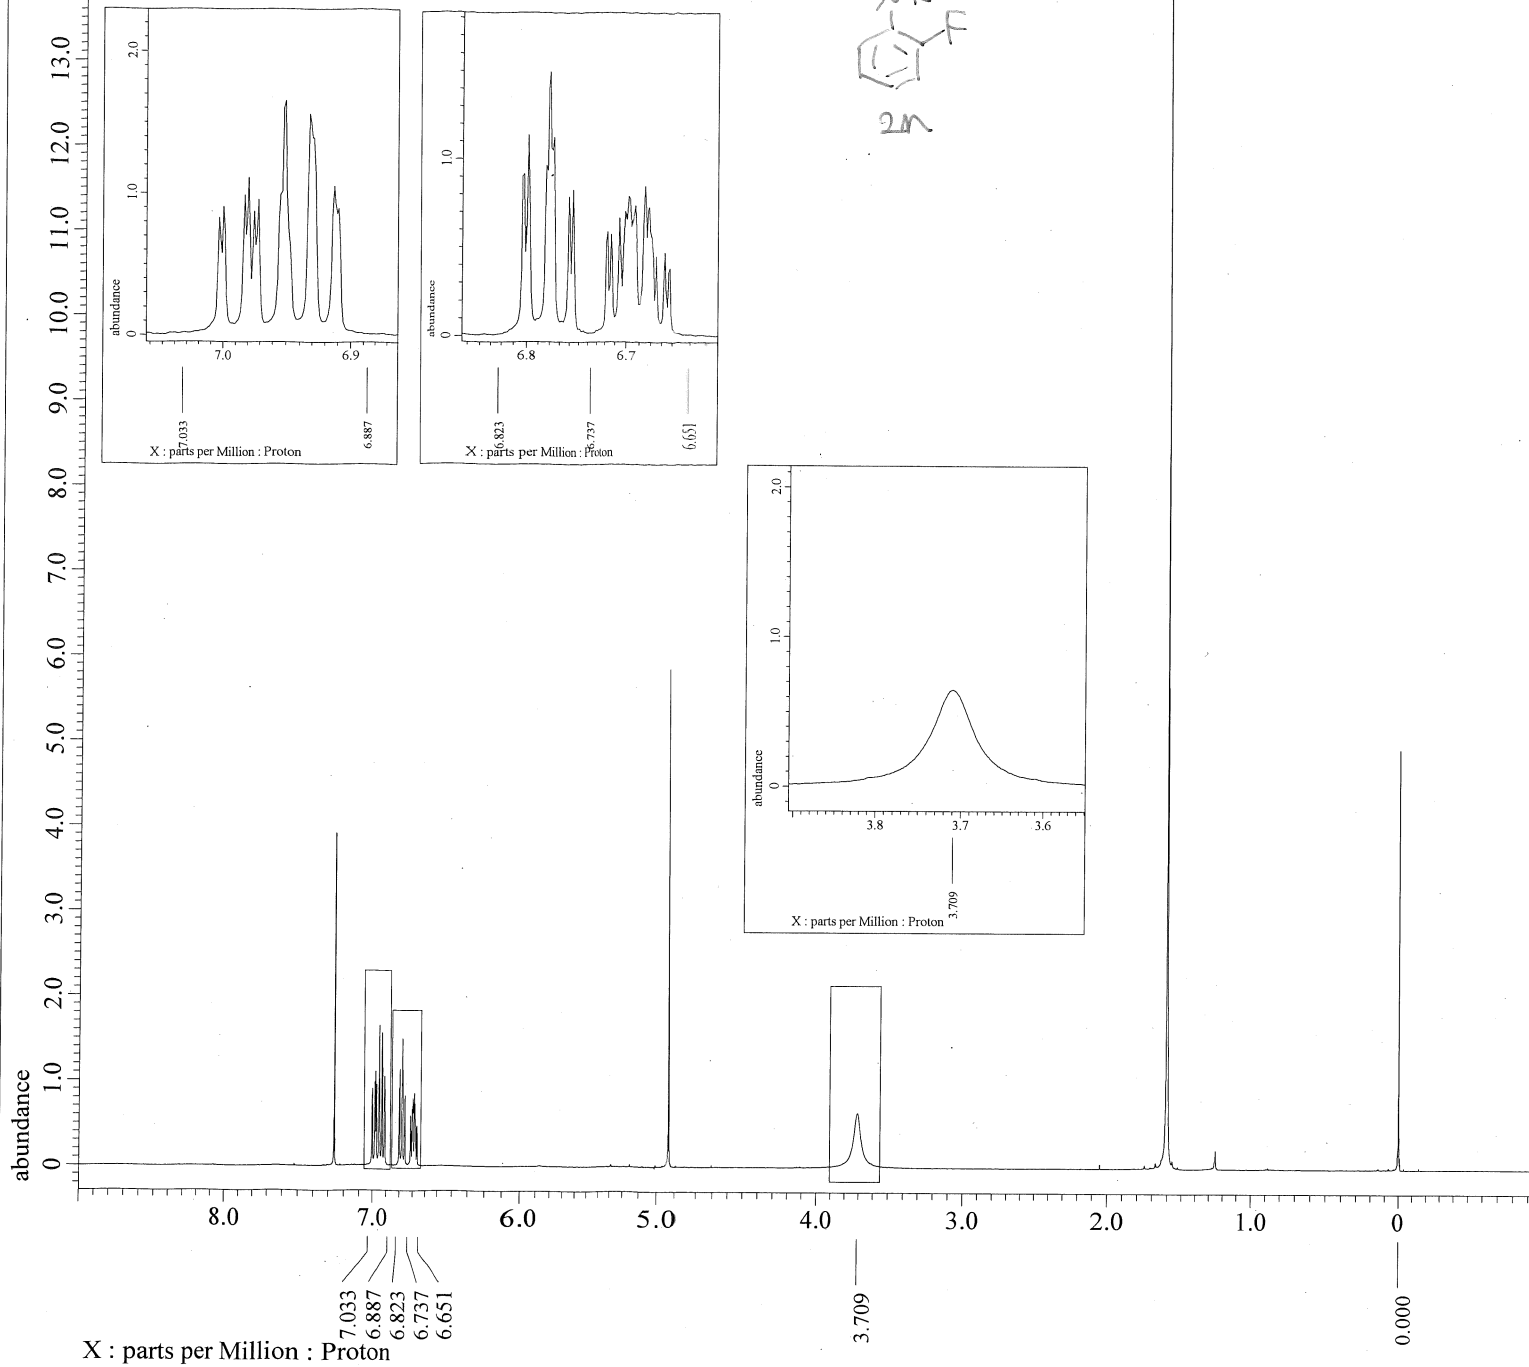

```

---- PROCESSING PARAMETERS ----
dc_balance( 0, FALSE )
sexp( 0.2[Hz], 0.0[s] )
trapezoid( 0[%], 0[%], 80[%], 100[%] )
zerofill( 1 )
fft( 1, TRUE, TRUE )
machinephase
ppm

Derived from: ASH-106-crude_Proton-1-1.jdf

Filename      = ASH-106-crude_Proton-1-2.
Author       = element
Experiment    = proton.jxp
Sample_Id    = ASH-106-crude
Solvent      = CHLOROFORM-D
Actual_Start_Time = 20-JUL-2024 17:54:06
Revision_Time  = 12-NOV-2024 10:21:25

Comment       = single_pulse
Data_Format   = 1D COMPLEX
Dim_Size      = 13107
X_Domain      = Proton
Dim_Title     = Proton
Dim_Units     = [ppm]
Dimensions    = X
Spectrometer  = DELTA2_NMR

Field_Strength = 9.4073814[T] (400[MHz])
X_Acq_Duration = 2.18103808[s]
X_Domain       = 1H
X_Freq         = 400.53219825[MHz]
X_Offset       = 5[ppm]
X_Points       = 16384
X_Prescans     = 1
X_Resolution   = 0.45849727[Hz]
X_Sweep        = 7.51201923[kHz]
X_Sweep_Clippped = 6.00961538[kHz]
Irr_Domain     = Proton
Irr_Freq       = 400.53219825[MHz]
Irr_Offset     = 5[ppm]
Tri_Domain     = Proton
Tri_Freq       = 400.53219825[MHz]
Tri_Offset     = 5[ppm]
Clipped        = FALSE
Scans          = 8
Total_Scans    = 8

Relaxation_Delay = 5[s]
Recvr_Gain       = 46
Temp_Get         = 21.4[dC]
X_90_Width      = 6.7[us]
X_Acq_Time       = 2.18103808[s]
X_Angle         = 45[deg]
X_Atn           = 0.8[dB]
X_Pulse         = 3.35[us]
Irr_Mode        = Off
Tri_Mode        = Off
Dante_Presat    = FALSE
Initial_Wait     = 1[s]
Repetition_Time = 7.18103808[s]

```

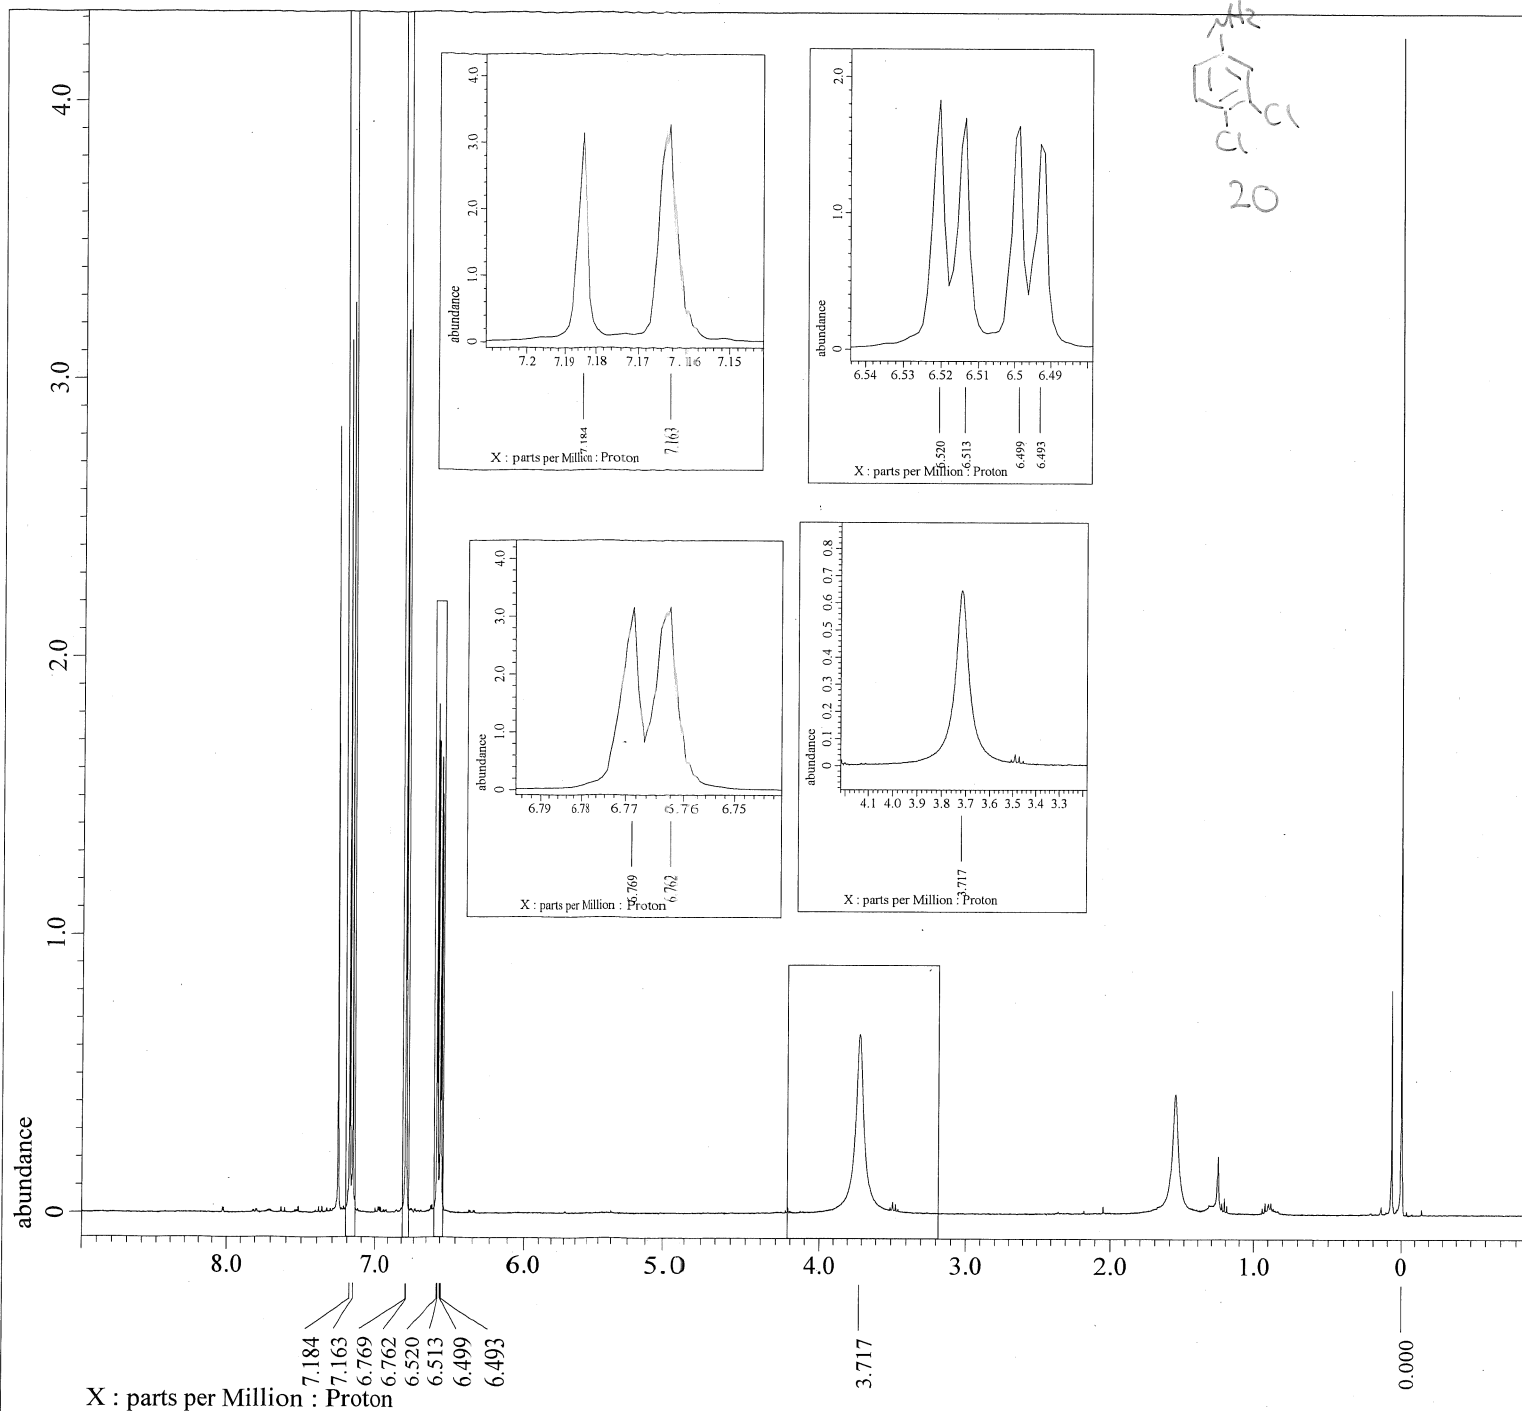

```

---- PROCESSING PARAMETERS ----
dc_balance( 0, FALSE )
sexp( 0.2[Hz], 0.0[s] )
trapezoid( 0[%], 0[%], 80[%], 100[%] )
zerofill( 1 )
fft( 1, TRUE, TRUE )
machinephase
ppm

```

Derived from: ASH-097-pure4\_Proton-1-1.jdf

```

Filename      = ASH-097-pure4_Proton-1-2.
Author       = element
Experiment    = proton.jxp
Sample_Id    = ASH-097-pure3
Solvent      = CHLOROFORM-D
Actual_Start_Time = 27-JUL-2024 10:29:31
Revision_Time  = 12-NOV-2024 10:25:03

```

```

Comment      = single_pulse
Data Format   = 1D COMPLEX
Dim_Size     = 13107
X_Domain     = Proton
Dim_Title    = Proton
Dim_Units    = [ppm]
Dimensions   = X
Spectrometer = DELTA2_NMR

```

```

Field Strength = 9.4073814[T] (400[MHz])
X_Acq_Duration = 2.18103808[s]
X_Domain       = 1H
X_Freq         = 400.53219825[MHz]
X_Offset       = 5[ppm]
X_Points       = 16384
X_Prescans     = 1
X_Resolution   = 0.45849727[Hz]
X_Sweep        = 7.51201923[kHz]
X_Sweep_Clippped = 6.00961538[kHz]
Irr_Domain     = Proton
Irr_Freq       = 400.53219825[MHz]
Irr_Offset     = 5[ppm]
Tri_Domain     = Proton
Tri_Freq       = 400.53219825[MHz]
Tri_Offset     = 5[ppm]
Clipped        = FALSE
Scans          = 8
Total_Scans    = 8

```

```

Relaxation_Delay = 5[s]
Recvr_Gain       = 46
Temp_Get         = 20.6[dC]
X_90_Width      = 6.7[us]
X_Acq_Time       = 2.18103808[s]
X_Angle          = 45[deg]
X_Atn            = 0.8[dB]
X_Pulse          = 3.35[us]
Irr_Mode         = Off
Tri_Mode         = Off
Dante_Presat     = FALSE
Initial_Wait     = 1[s]
Repetition_Time  = 7.18103808[s]

```

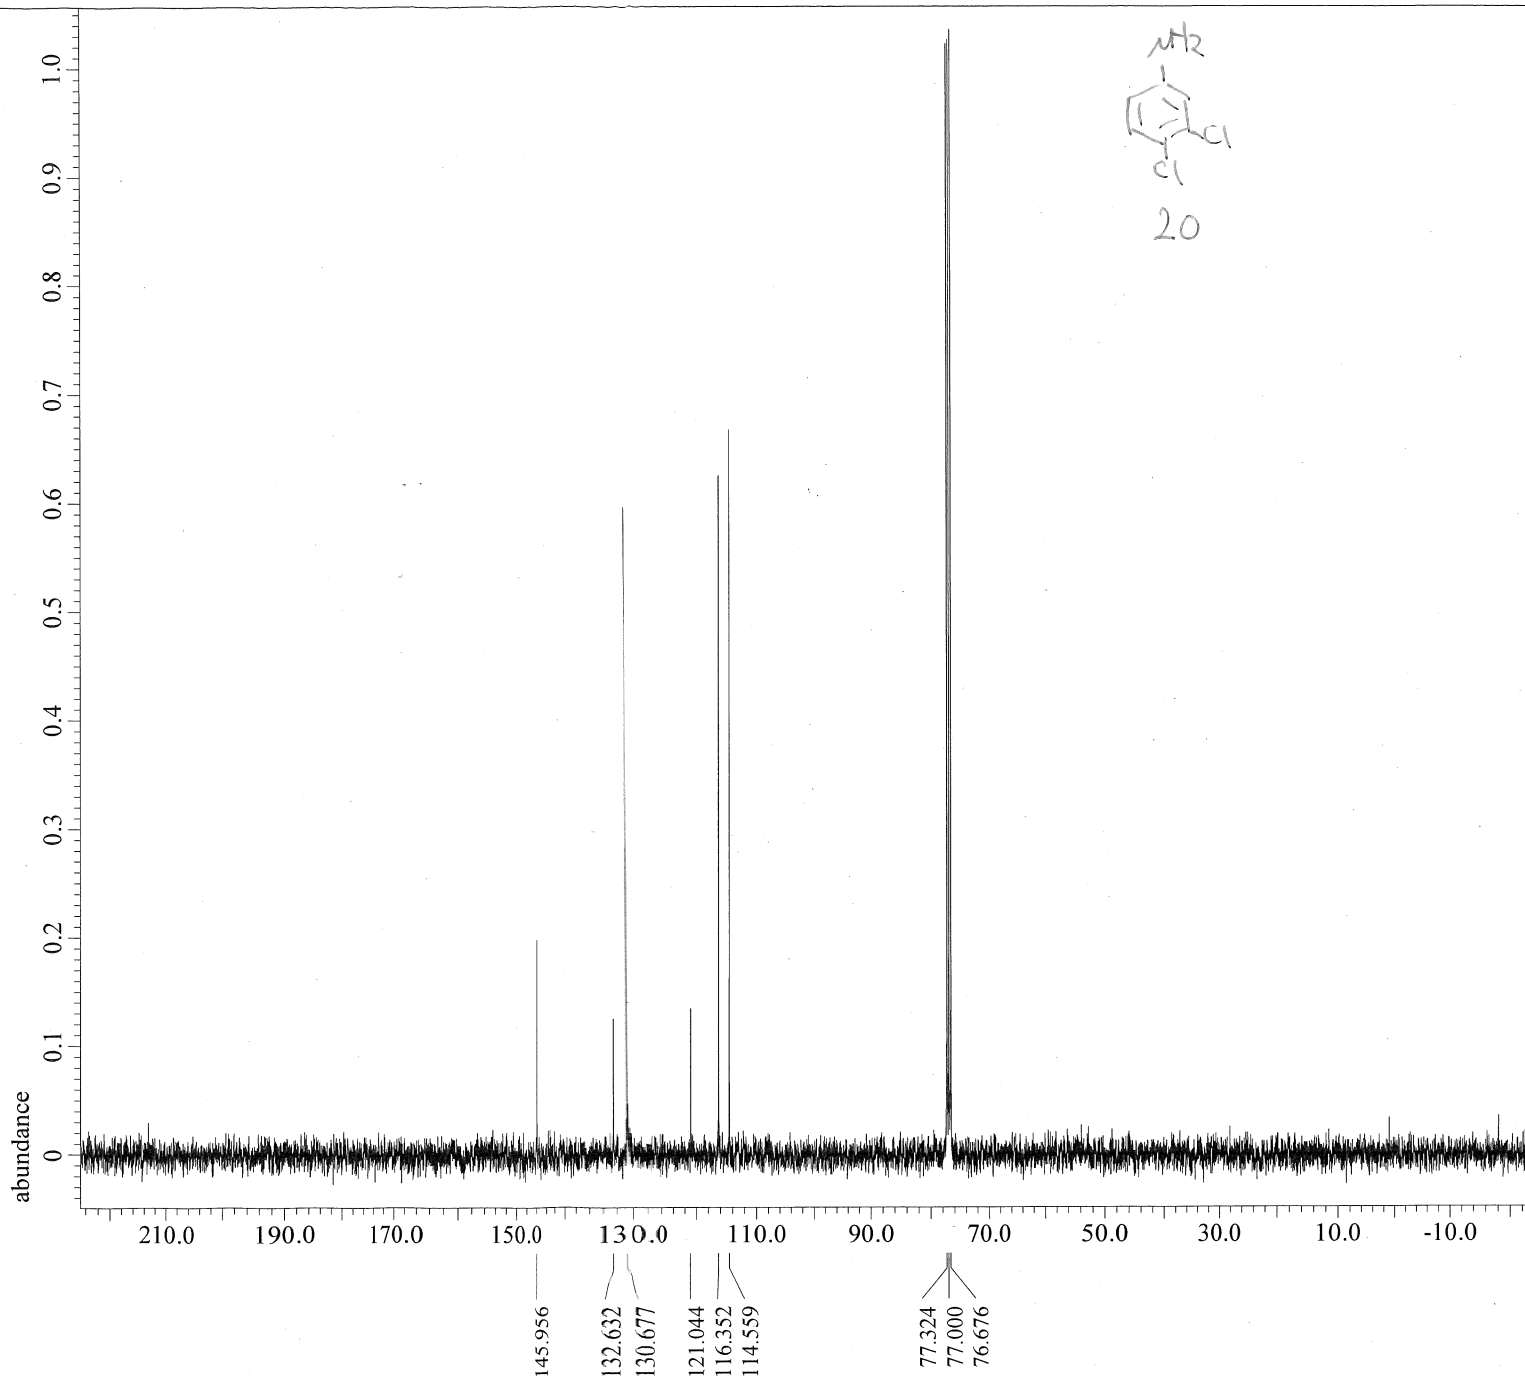

X : parts per Million : 13C

----- PROCESSING PARAMETERS -----  
dc\_balance( 0, FALSE )  
sexp( 2.0[Hz], 0.0[s] )  
trapezoid3( 0[%], 80[%], 100[%] )  
zerofill( 1 )  
fft( 1, TRUE, TRUE )  
machinephase  
ppm

Derived from: ASH-097-13C-1.jdf

Filename = ASH-097-13C-2.jdf  
Author = element  
Experiment = single\_pulse\_dec  
Sample\_Id = S#451021  
Solvent = CHLOROFORM-D  
Actual\_Start\_Time = 27-JUL-2024 18:48:15  
Revision\_Time = 27-JUL-2024 13:59:19  
  
Comment = single pulse decoupled ga  
Data\_Format = 1D COMPLEX  
Dim\_Size = 26214  
X\_Domain = 13C  
Dim\_Title = 13C  
Dim\_Units = [ppm]  
Dimensions = X  
Site = ECS 400  
Spectrometer = JNM-ECS400  
  
Field\_Strength = 9.20197068[T] (390[MHz])  
X\_Acq\_Duration = 1.06430464[s]  
X\_Domain = 13C  
X\_Freq = 98.51479726[MHz]  
X\_Offset = 100[ppm]  
X\_Points = 32768  
X\_Prescans = 4  
X\_Resolution = 0.93958061[Hz]  
X\_Sweep = 30.78817734[kHz]  
Irr\_Domain = 1H  
Irr\_Freq = 391.78655441[MHz]  
Irr\_Offset = 5[ppm]  
Clipped = FALSE  
Scans = 73  
Total\_Scans = 73  
  
Relaxation\_Delay = 2[s]  
Recvr\_Gain = 60  
Temp\_Get = 22.8[dC]  
X\_90\_Width = 9.46[us]  
X\_Acq\_Time = 1.06430464[s]  
X\_Angle = 30[deg]  
X\_Atn = 4.9[dB]  
X\_Pulse = 3.15333333[us]  
Irr\_Atn\_Dec = 22.45[dB]  
Irr\_Atn\_Noise = 22.45[dB]  
Irr\_Noise = WALTZ  
Decoupling = TRUE  
Initial\_Wait = 1[s]  
Noe = TRUE  
Noe\_Time = 2[s]  
Repetition\_Time = 3.06430464[s]

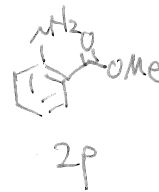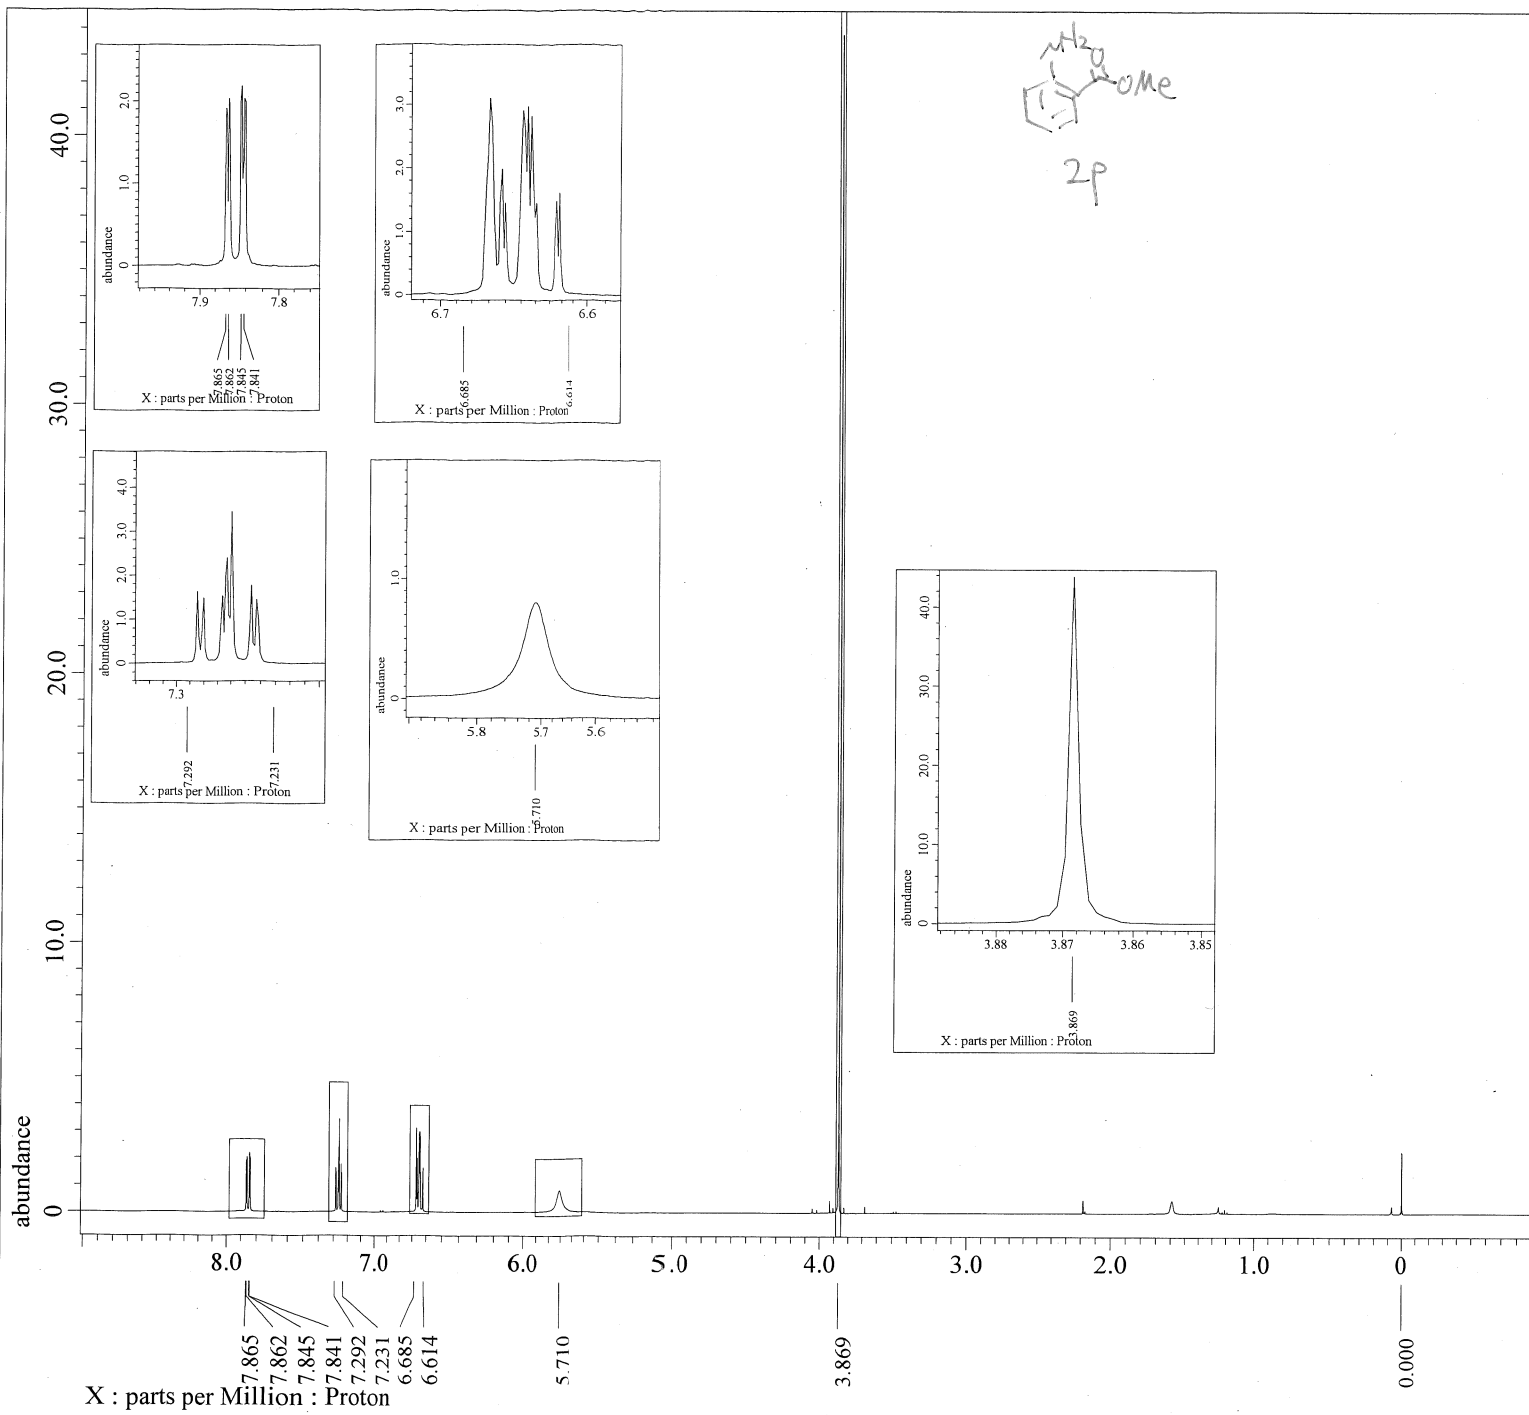

----- PROCESSING PARAMETERS -----  
 dc\_balance( 0, FALSE )  
 sexp( 0.2[Hz], 0.0[s] )  
 trapezoid( 0[%], 0[%], 80[%], 100[%] )  
 zerofill( 1 )  
 fft( 1, TRUE, TRUE )  
 machinephase  
 ppm  
 Derived from: ASH-104-purelast\_Proton-1-1.jdf

Filename = ASH-104-purelast\_Proton-1  
 Author = element  
 Experiment = proton.jxp  
 Sample\_Id = ASH-104-purelast  
 Solvent = CHLOROFORM-D  
 Actual\_Start\_Time = 27-JUL-2024 19:07:25  
 Revision\_Time = 12-NOV-2024 10:29:17

Comment = single\_pulse  
 Data\_Format = 1D COMPLEX  
 Dim\_Size = 13107  
 X\_Domain = Proton  
 Dim\_Title = Proton  
 Dim\_Units = [ppm]  
 Dimensions = X  
 Site = JNM-ECS400  
 Spectrometer = DELTA2\_NMR

Field\_Strength = 9.37221[T] (400[MHz])  
 X\_Acq\_Duration = 2.1889024[s]  
 X\_Domain = 1H  
 X\_Freq = 399.03472754 [MHz]  
 X\_Offset = 5.0[ppm]  
 X\_Points = 16384  
 X\_Prescans = 1  
 X\_Resolution = 0.45684997 [Hz]  
 X\_Sweep = 7.48502994 [kHz]  
 X\_Sweep\_Clippped = 5.98802395 [kHz]  
 Irr\_Domain = Proton  
 Irr\_Freq = 399.03472754 [MHz]  
 Irr\_Offset = 5.0[ppm]  
 Tri\_Domain = Proton  
 Tri\_Freq = 399.03472754 [MHz]  
 Tri\_Offset = 5.0[ppm]  
 Clipped = FALSE  
 Scans = 8  
 Total\_Scans = 8

Relaxation\_Delay = 5[s]  
 Recvr\_Gain = 36  
 Temp\_Get = 22.1[dC]  
 X\_90\_Width = 6.6[us]  
 X\_Acq\_Time = 2.1889024[s]  
 X\_Angle = 45[deg]  
 X\_Atn = 1[dB]  
 X\_Pulse = 3.3[us]  
 Irr\_Mode = Off  
 Tri\_Mode = Off  
 Dante\_Presat = FALSE  
 Initial\_Wait = 1[s]  
 Repetition\_Time = 7.1889024[s]

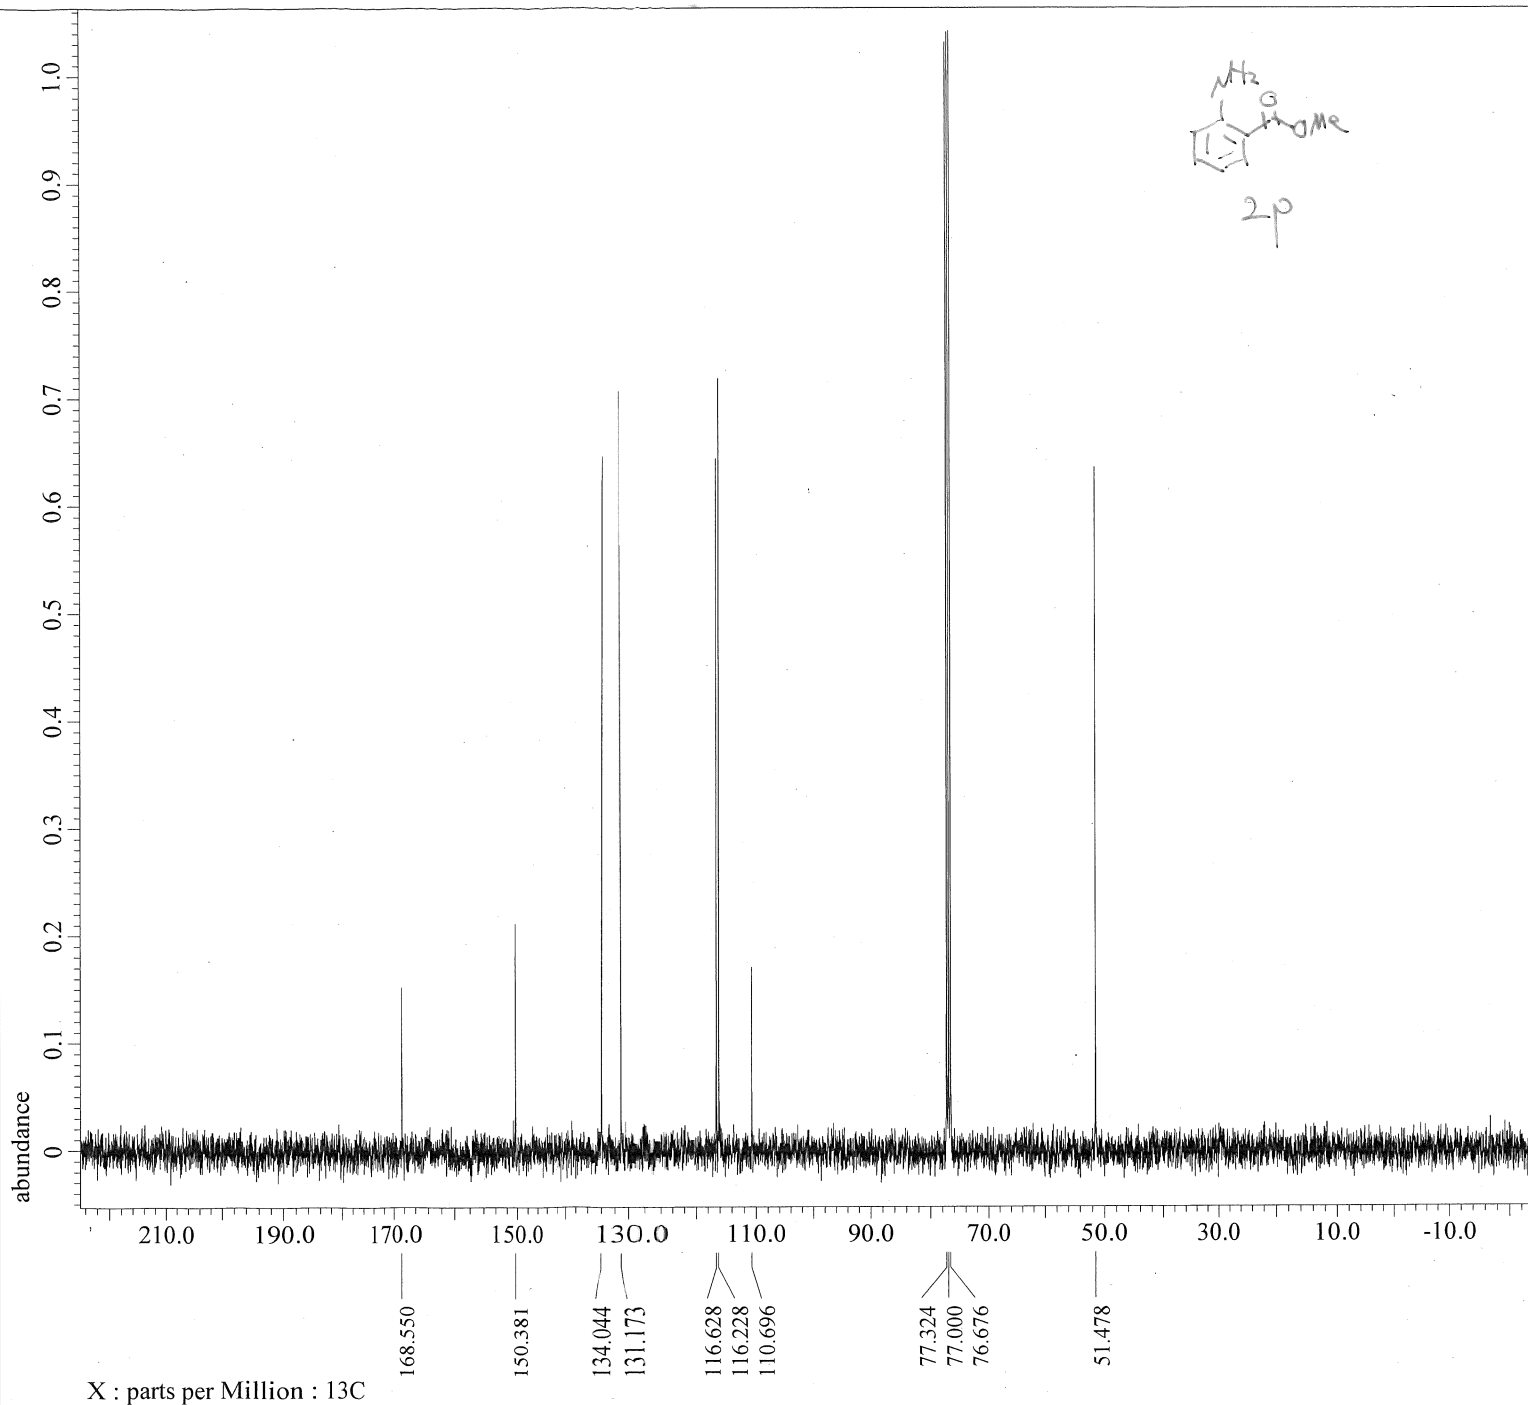

----- PROCESSING PARAMETERS -----  
 dc\_balance( 0, FALSE )  
 sexp( 2.0[Hz], 0.0[s] )  
 trapezoid3( 0[%], 80[%], 100[%] )  
 zerofill( 1 )  
 fft( 1, TRUE, TRUE )  
 machinephase  
 ppm

Derived from: ASH-104-13C-1.jdf

Filename = ASH-104-13C-2.jdf  
 Author = element  
 Experiment = single\_pulse\_dec  
 Sample\_Id = 1  
 Solvent = CHLOROFORM-D  
 Actual\_Start\_Time = 29-JUL-2024 16:20:33  
 Revision\_Time = 29-JUL-2024 10:26:09

Comment = single pulse decoupled ga  
 Data\_Format = 1D COMPLEX  
 Dim\_Size = 26214  
 X\_Domain = 13C  
 Dim\_Title = 13C  
 Dim\_Units = [ppm]  
 Dimensions = X  
 Site = ECS 400  
 Spectrometer = JNM-ECS400

Field\_Strength = 9.20197068[T] (390[MHz])  
 X\_Acq\_Duration = 1.06430464[s]  
 X\_Domain = 13C  
 X\_Freq = 98.51479726[MHz]  
 X\_Offset = 100[ppm]  
 X\_Points = 32768  
 X\_Prescans = 4  
 X\_Resolution = 0.93958061[Hz]  
 X\_Sweep = 30.78817734[kHz]  
 Irr\_Domain = 1H  
 Irr\_Freq = 391.78655441[MHz]  
 Irr\_Offset = 5[ppm]  
 Clipped = FALSE  
 Scans = 57  
 Total\_Scans = 57

Relaxation\_Delay = 2[s]  
 Recvr\_Gain = 60  
 Temp\_Get = 21.8[dC]  
 X\_90\_Width = 9.46[us]  
 X\_Acq\_Time = 1.06430464[s]  
 X\_Angle = 30[deg]  
 X\_Atn = 4.9[dB]  
 X\_Pulse = 3.15333333[us]  
 Irr\_Atn\_Dec = 22.45[dB]  
 Irr\_Atn\_Noise = 22.45[dB]  
 Irr\_Noise = WALTZ  
 Decoupling = TRUE  
 Initial\_Wait = 1[s]  
 Noe = TRUE  
 Noe\_Time = 2[s]  
 Repetition\_Time = 3.06430464[s]

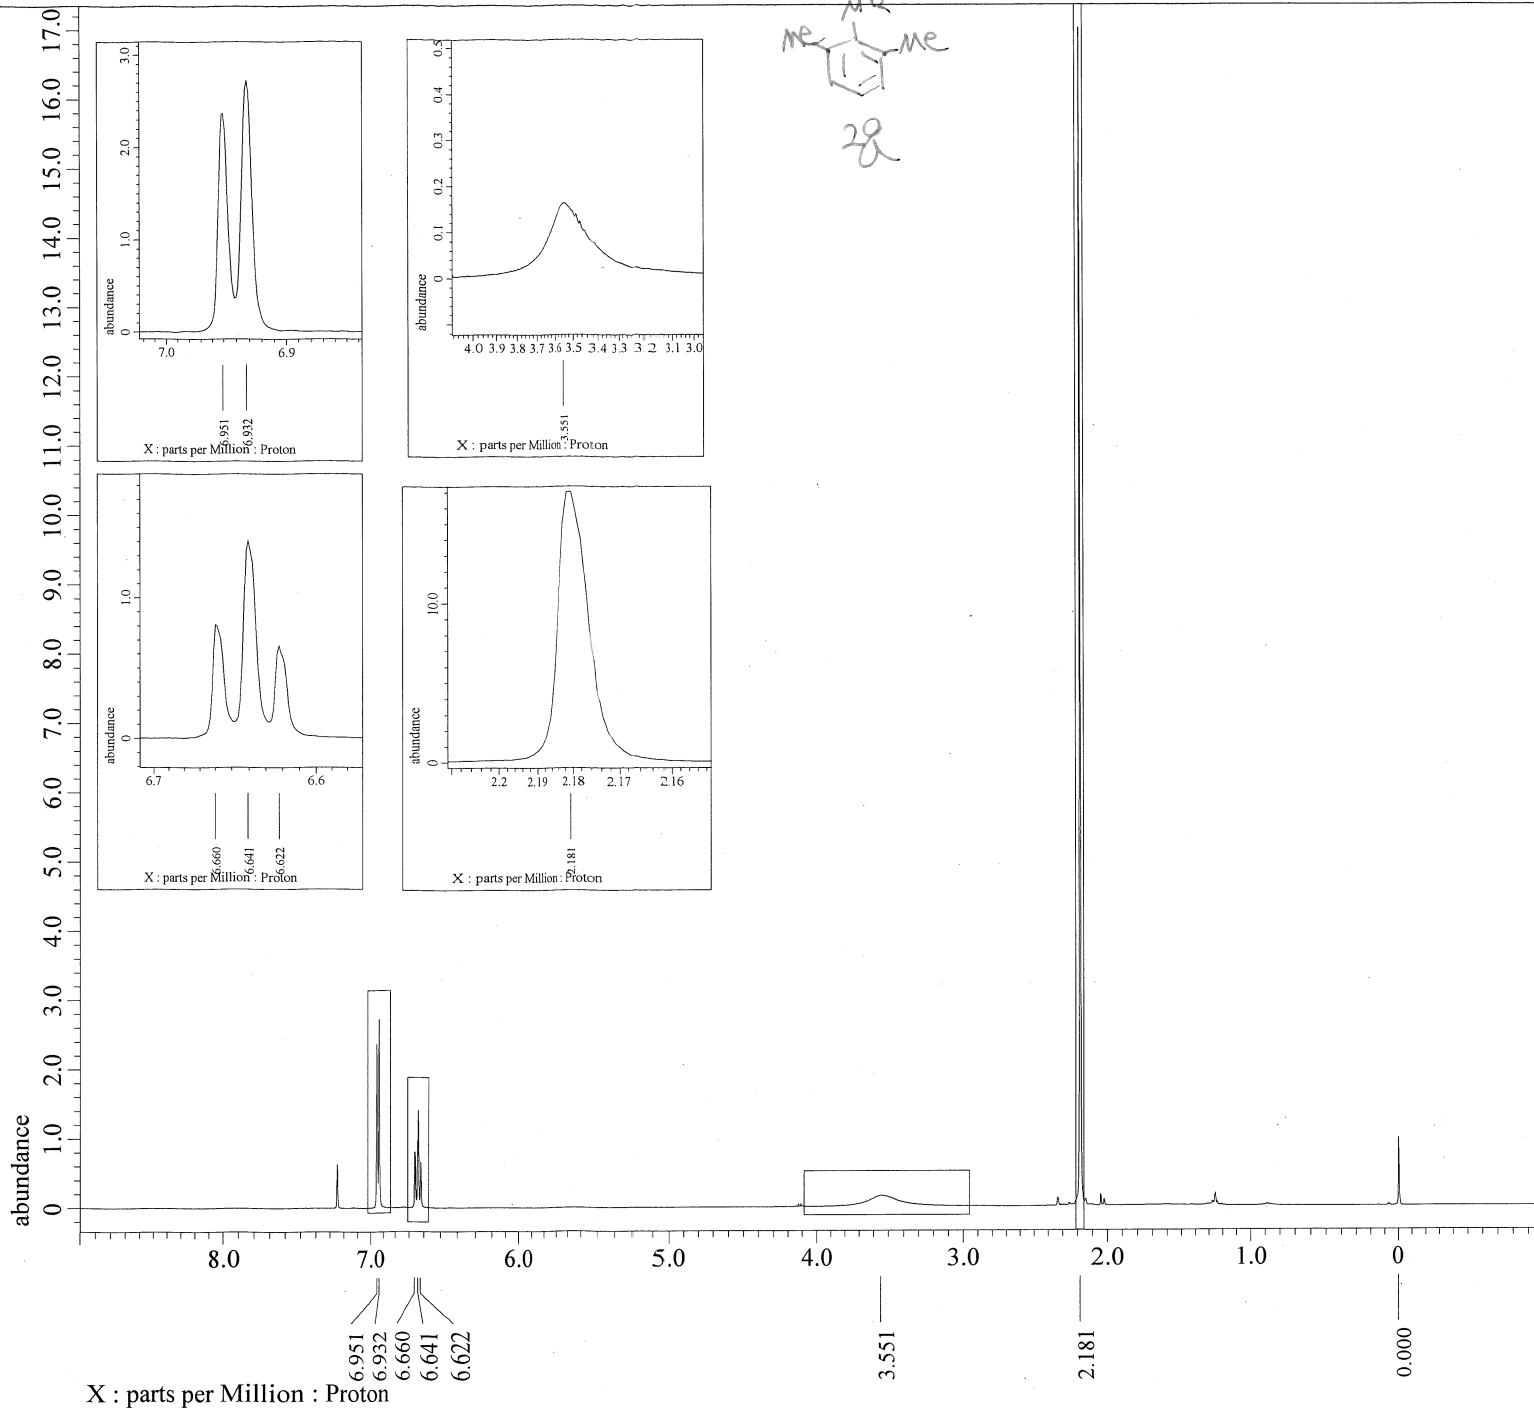

---- PROCESSING PARAMETERS ----

```

dc_balance( 0, FALSE )
sexp( 0.2[Hz], 0.0[s] )
trapezoid( 0[%], 0[%], 80[%], 100[%] )
zerofill( 1 )
fft( 1, TRUE, TRUE )
machinephase
ppm

```

Derived from: ASH-105-pure2\_Proton-1-1.jdf

Filename = ASH-105-pure2\_Proton-1-2.  
 Author = element  
 Experiment = proton.jxp  
 Sample\_Id = ASH-105-pure2  
 Solvent = CHLOROFORM-D  
 Actual\_Start\_Time = 20-JUL-2024 15:38:15  
 Revision\_Time = 12-NOV-2024 10:34:24

Comment = single\_pulse  
 Data\_Format = 1D\_COMPLEX  
 Dim\_Size = 13107  
 X\_Domain = Proton  
 Dim\_Title = Proton  
 Dim\_Units = [ppm]  
 Dimensions = X  
 Spectrometer = DELTA2\_NMR

Field\_Strength = 9.4073814[T] (400[MHz])  
 X\_Acq\_Duration = 2.18103808[s]  
 X\_Domain = 1H  
 X\_Freq = 400.53219825[MHz]  
 X\_Offset = 5[ppm]  
 X\_Points = 16384  
 X\_Prescans = 1  
 X\_Resolution = 0.45849727[Hz]  
 X\_Sweep = 7.51201923[kHz]  
 X\_Sweep\_Clippped = 6.00961538[kHz]  
 Irr\_Domain = Proton  
 Irr\_Freq = 400.53219825[MHz]  
 Irr\_Offset = 5[ppm]  
 Tri\_Domain = Proton  
 Tri\_Freq = 400.53219825[MHz]  
 Tri\_Offset = 5[ppm]  
 Clipped = FALSE  
 Scans = 8  
 Total\_Scans = 8

Relaxation\_Delay = 5[s]  
 Recvr\_Gain = 40  
 Temp\_Get = 21.7[dC]  
 X\_90\_Width = 6.7[us]  
 X\_Acq\_Time = 2.18103808[s]  
 X\_Angle = 45[deg]  
 X\_Atn = 0.8[dB]  
 X\_Pulse = 3.35[us]  
 Irr\_Mode = Off  
 Tri\_Mode = Off  
 Dante\_Presat = FALSE  
 Initial\_Wait = 1[s]  
 Repetition\_Time = 7.18103808[s]

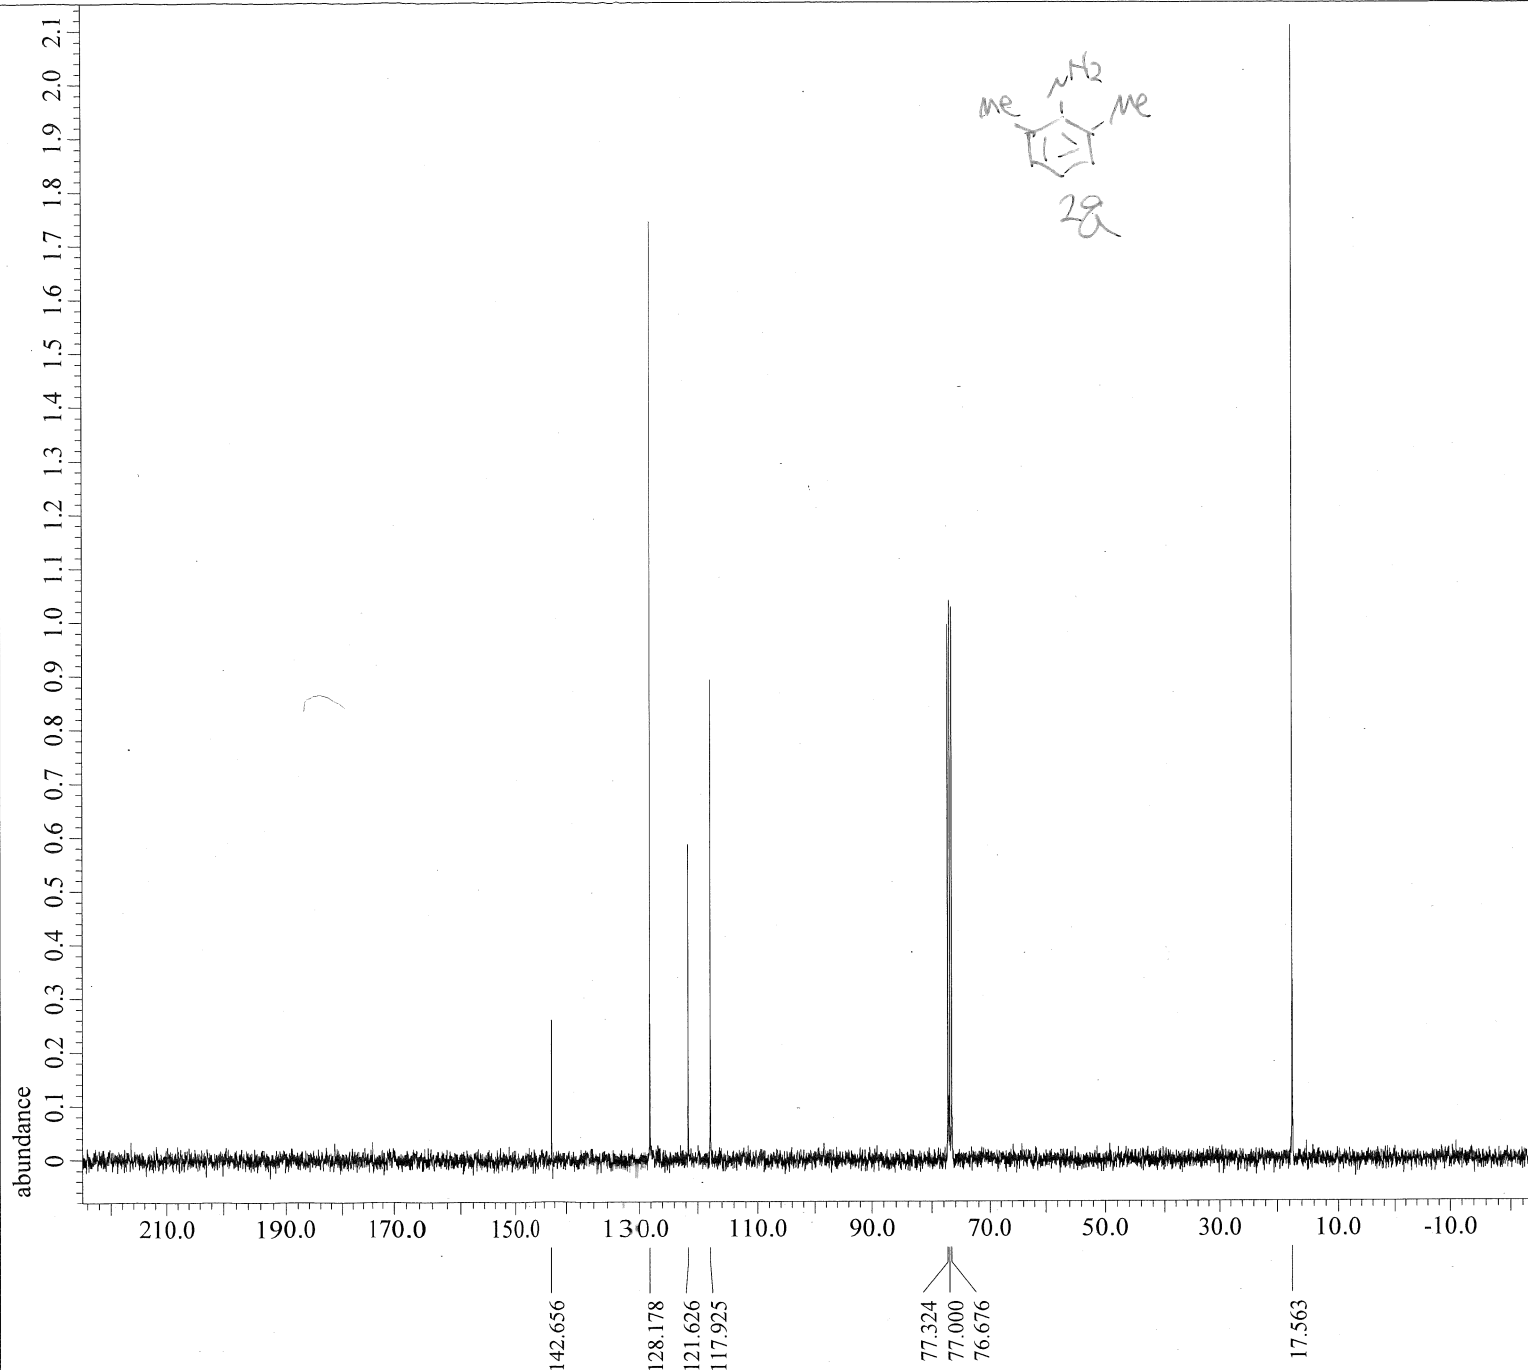

X : parts per Million : 13C

```

---- PROCESSING PARAMETERS ----
dc_balance( 0, FALSE )
sexp( 2.0[Hz], 0.0[s] )
trapezoid3( 0[%], 80[%], 100[%] )
zerofill( 1 )
fft( 1, TRUE, TRUE )
machinephase
ppm

```

Derived from: ASH-105-13C-1.jdf

```

Filename      = ASH-105-13C-2.jdf
Author        = element
Experiment     = single_pulse_dec
Sample_Id     = 1
Solvent       = CHLOROFORM-D
Actual_Start_Time = 29-JUL-2024 17:59:10
Revision_Time  = 29-JUL-2024 12:25:06

Comment       = single pulse decoupled ga
Data Format    = 1D COMPLEX
Dim_Size      = 26214
X_Domain      = 13C
Dim_Title     = 13C
Dim_Units     = [ppm]
Dimensions    = X
Site          = ECS 400
Spectrometer  = JNM-ECS400

Field_Strength = 9.20197068[T] (390[MHz])
X_Acq_Duration = 1.06430464[s]
X_Domain       = 13C
X_Freq         = 98.51479726[MHz]
X_Offset       = 100[ppm]
X_Points       = 32768
X_Prescans     = 4
X_Resolution   = 0.93958061[Hz]
X_Sweep        = 30.78817734[kHz]
Irr_Domain     = 1H
Irr_Freq       = 391.78655441[MHz]
Irr_Offset     = 5[ppm]
Clipped        = FALSE
Scans          = 59
Total_Scans    = 59

Relaxation_Delay = 2[s]
Recvr_Gain       = 60
Temp_Get         = 22.2[dC]
X_90_Width       = 9.46[us]
X_Acq_Time       = 1.06430464[s]
X_Angle          = 30[deg]
X_Atn            = 4.9[dB]
X_Pulse          = 3.15333333[us]
Irr_Atn_Dec      = 22.45[dB]
Irr_Atn_Noe     = 22.45[dB]
Irr_Noise        = WALTZ
Decoupling       = TRUE
Initial_Wait     = 1[s]
Noe              = TRUE
Noe_Time         = 2[s]
Repetition_Time  = 3.06430464[s]

```

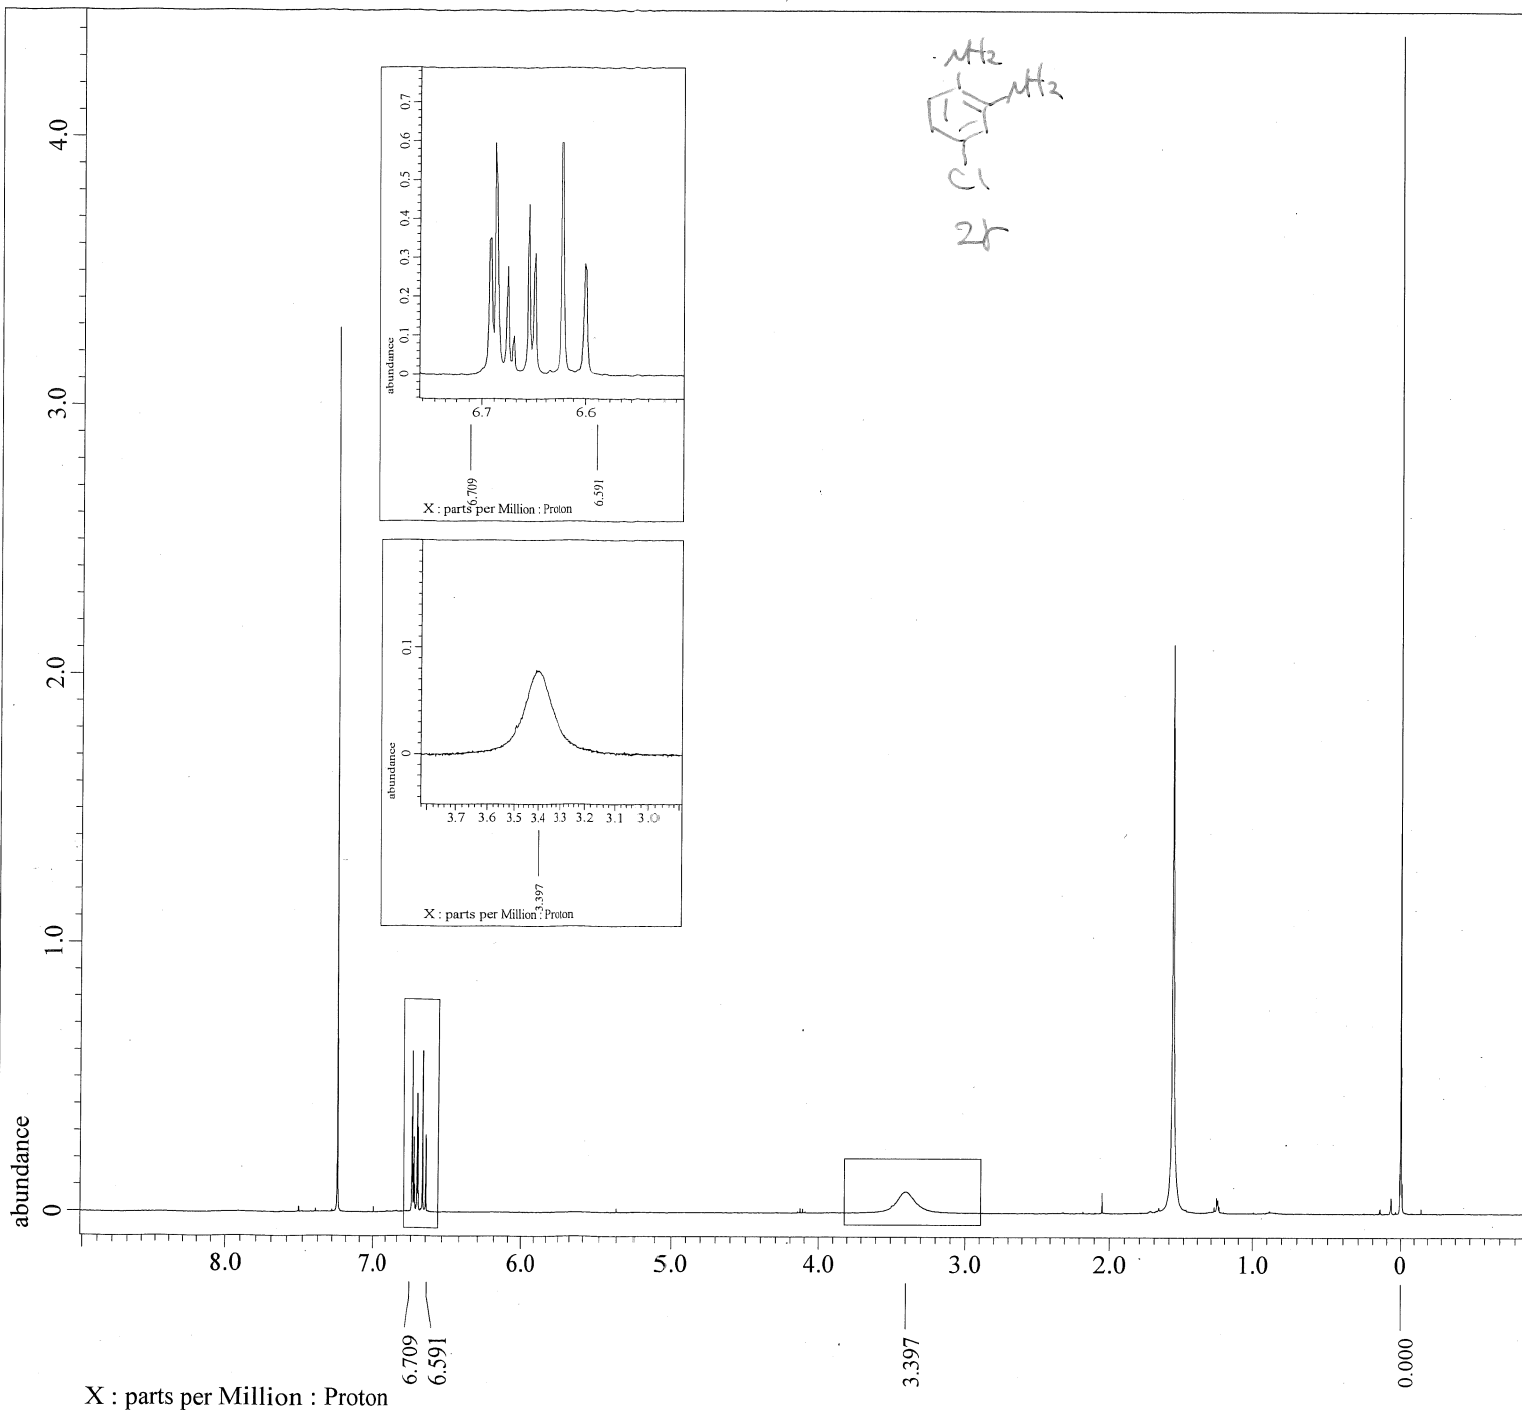

```

---- PROCESSING PARAMETERS ----
sexp( 0.2[Hz], 0.0[s] )
trapezoid( 0[%], 0[%], 80[%], 100[%] )
zerofill( 1 )
fft( 1, TRUE, TRUE )
machinephase
ppm

```

Derived from: ASH-151-pure2\_Proton-1-1.jdf

|                   |                         |
|-------------------|-------------------------|
| Filename          | = ASH-151-pure2_Proton- |
| Author            | = element               |
| Experiment        | = proton_auto.jxp       |
| Sample_Id         | = ASH-151-pure2         |
| Solvent           | = CHLOROFORM-D          |
| Actual_Start_Time | = 19-AUG-2024 21:16:11  |
| Revision_Time     | = 12-NOV-2024 10:40:18  |

|              |                |
|--------------|----------------|
| Comment      | = single_pulse |
| Data_Format  | = 1D_COMPLEX   |
| Dim_Size     | = 13107        |
| X_Domain     | = Proton       |
| Dim_Title    | = Proton       |
| Dim_Units    | = [ppm]        |
| Dimensions   | = X            |
| Spectrometer | = DELTA2_NMR   |

|                  |                          |
|------------------|--------------------------|
| Field_Strength   | = 9.2982153[T] (400[MHz] |
| X_Acq_Duration   | = 2.20725248[s]          |
| X_Domain         | = Proton                 |
| X_Freq           | = 395.88430144[MHz]      |
| X_Offset         | = 5[ppm]                 |
| X_Points         | = 16384                  |
| X_Prescans       | = 1                      |
| X_Resolution     | = 0.45305193[Hz]         |
| X_Sweep          | = 7.42280285[kHz]        |
| X_Sweep_Clippped | = 5.93824228[kHz]        |
| Irr_Domain       | = Proton                 |
| Irr_Freq         | = 395.88430144[MHz]      |
| Irr_Offset       | = 5[ppm]                 |
| Tri_Domain       | = Proton                 |
| Tri_Freq         | = 395.88430144[MHz]      |
| Tri_Offset       | = 5[ppm]                 |
| Blanking         | = 2[us]                  |
| Clipped          | = FALSE                  |
| Scans            | = 8                      |
| Total_Scans      | = 8                      |

|                  |                         |
|------------------|-------------------------|
| Relaxation_Delay | = 5[s]                  |
| Recvr_Gain       | = 66                    |
| Temp_Get         | = 19.9[dC]              |
| X_90_Width       | = 6.34[us]              |
| X_Acq_Time       | = 2.20725248[s]         |
| X_Angle          | = 45[deg]               |
| X_Atn            | = 5[dB]                 |
| X_Pulse          | = 3.17[us]              |
| Irr_Mode         | = Off                   |
| Tri_Mode         | = Off                   |
| Dante_Loop       | = 500                   |
| Dante_Presat     | = FALSE                 |
| Decimation_Rate  | = 0                     |
| Experiment_Path  | = C:\Program Files\JEOL |
| Initial_Wait     | = 1[s]                  |
| Phase            | = {0, 90, 270, 180, 180 |
| Presat_Time      | = 5[s]                  |

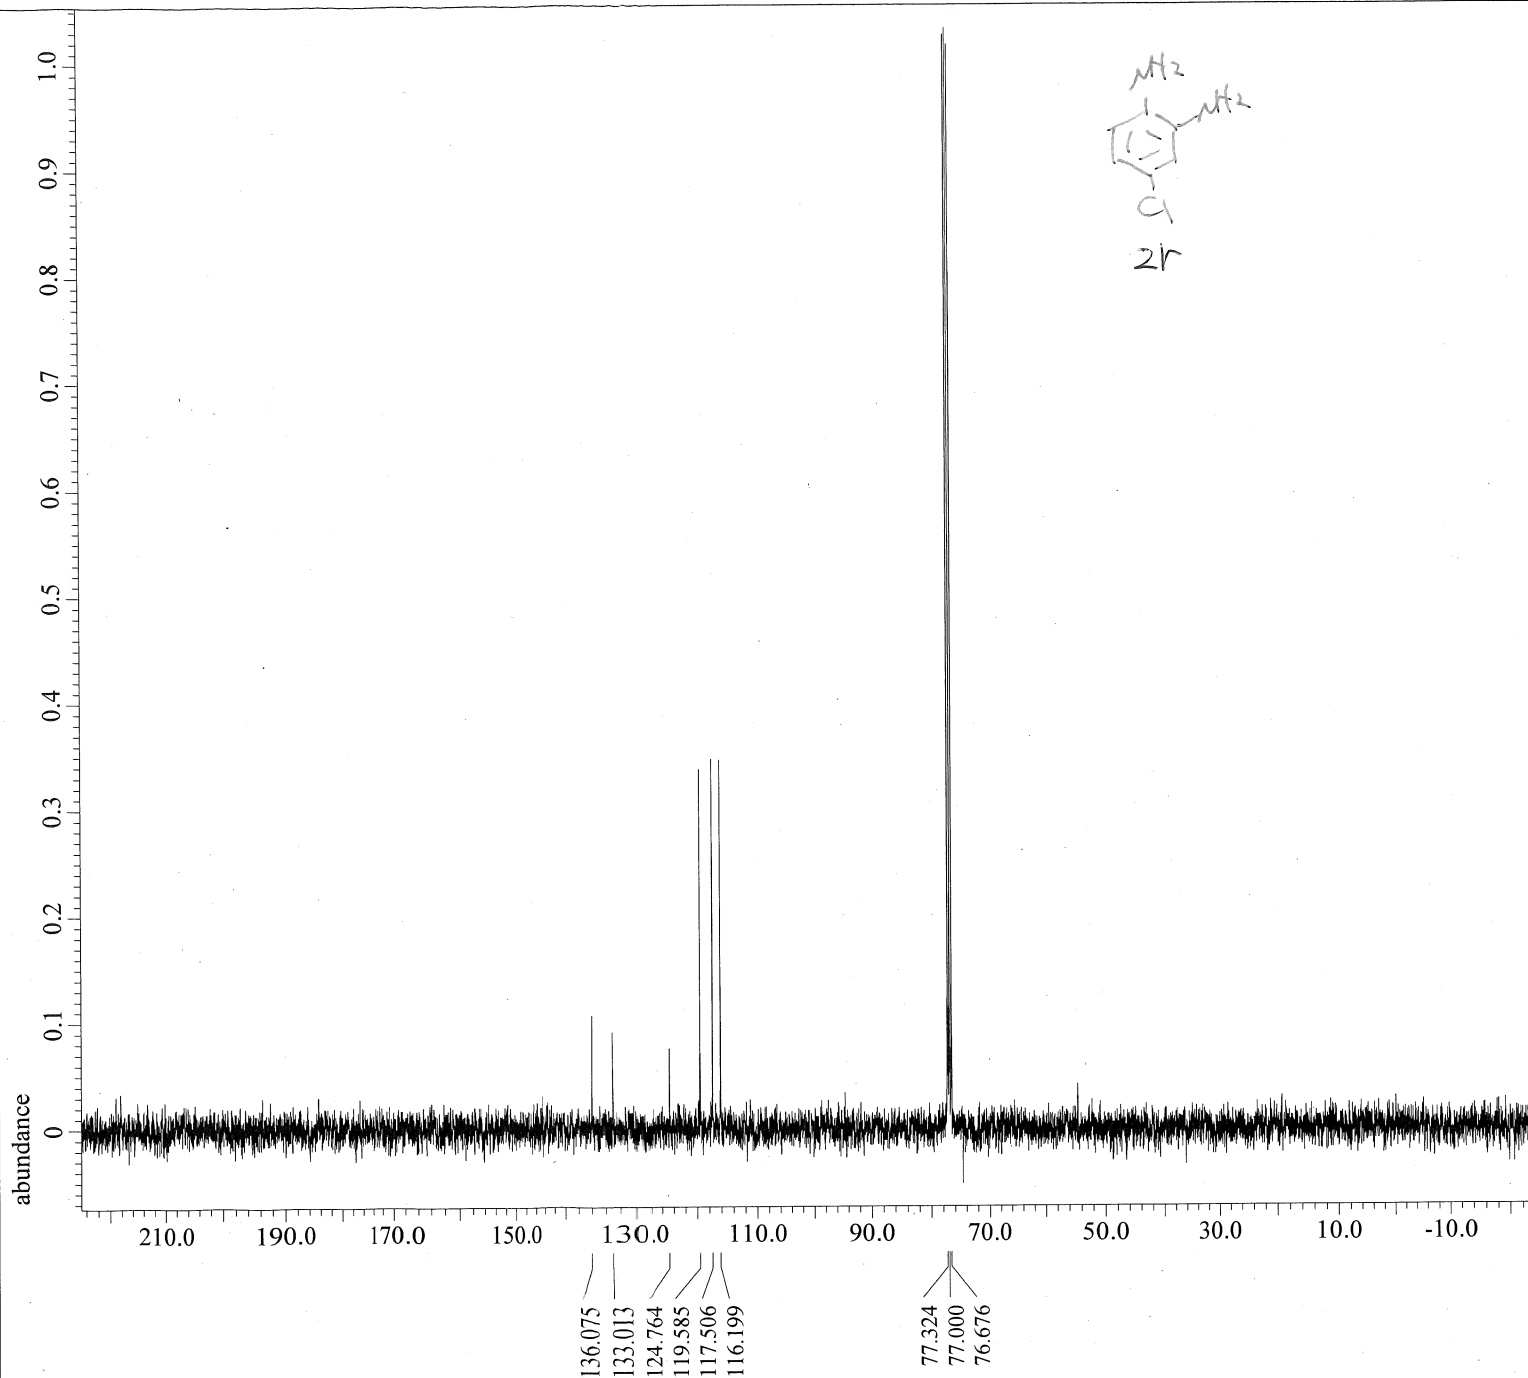

X : parts per Million : 13C

----- PROCESSING PARAMETERS -----  
dc\_balance( 0, FALSE )  
sexf( 2.0[Hz], 0.0[s] )  
trapezoid3( 0[%], 80[%], 100[%] )  
zerofill( 1 )  
fft( 1, TRUE, TRUE )  
machinephase  
ppm

Derived from: ASH-151-13C-1.jdf

Filename = ASH-151-13C-2.jdf  
Author = element  
Experiment = single\_pulse\_dec  
Sample\_Id = 1  
Solvent = CHLOROFORM-D  
Actual\_Start\_Time = 20-AUG-2024 03:48:35  
Revision\_Time = 19-OCT-2024 13:35:25  
  
Comment = single pulse decoupled ga  
Data\_Format = 1D COMPLEX  
Dim\_Size = 26214  
X\_Domain = 13C  
Dim\_Title = 13C  
Dim\_Units = [ppm]  
Dimensions = X  
Site = ECS 400  
Spectrometer = JNM-ECS400  
  
Field\_Strength = 9.20197068[T] (390[MHz])  
X\_Acq\_Duration = 1.06430464[s]  
X\_Domain = 13C  
X\_Freq = 98.51479726[MHz]  
X\_Offset = 100[ppm]  
X\_Points = 32768  
X\_Prescans = 4  
X\_Resolution = 0.93958061[Hz]  
X\_Sweep = 30.78817734[kHz]  
Irr\_Domain = 1H  
Irr\_Freq = 391.78655441[MHz]  
Irr\_Offset = 5[ppm]  
Clipped = FALSE  
Scans = 52  
Total\_Scans = 52  
  
Relaxation\_Delay = 2[s]  
Recvr\_Gain = 60  
Temp\_Get = 21.2[dC]  
X\_90\_Width = 9.46[us]  
X\_Acq\_Time = 1.06430464[s]  
X\_Angle = 30[deg]  
X\_Atn = 4.9[dB]  
X\_Pulse = 3.15333333[us]  
Irr\_Atn\_Dec = 22.45[dB]  
Irr\_Atn\_No = 22.45[dB]  
Irr\_Noise = WALTZ  
Decoupling = TRUE  
Initial\_Wait = 1[s]  
Noe = TRUE  
Noe\_Time = 2[s]  
Repetition\_Time = 3.06430464[s]
